# Supplementary material for: Development of a Prognostic Model Based on the Identification of EMT-Related lncRNAs in Triple-Negative Breast Cancer
Source: Hindawi journal article supplement (doi:10.1155/2021/9219961), 2021-11-27
Supplement: f1 [file 9219961.f1.zip]

| gene      | HR       | z        | pvalue   | lower    | upper    |
|-----------|----------|----------|----------|----------|----------|
| YTHDF3-A  | 1.764467 | 4.808526 | 1.52E-06 | 1.399889 | 2.223995 |
| UBE2E2-A  | 1.578622 | 3.336083 | 0.00085  | 1.207227 | 2.064274 |
| SOCS2-AS  | 1.367147 | 3.157191 | 0.001593 | 1.125906 | 1.660078 |
| TINCR     | 1.457961 | 2.781001 | 0.005419 | 1.117745 | 1.901731 |
| A2M-AS1   | 0.383716 | -2.74197 | 0.006107 | 0.19349  | 0.760958 |
| CYB561D2  | 1.441663 | 2.684848 | 0.007256 | 1.103804 | 1.882938 |
| TUG1      | 0.472494 | -2.66239 | 0.007759 | 0.272081 | 0.820531 |
| NIFK-AS1  | 0.452269 | -2.60589 | 0.009164 | 0.249007 | 0.821453 |
| LINC00667 | 0.48135  | -2.58671 | 0.00969  | 0.276604 | 0.837649 |
| NDUFB2-7  | 1.448511 | 2.463441 | 0.013761 | 1.078671 | 1.945157 |
| CASC15    | 0.181184 | -2.31269 | 0.02074  | 0.042598 | 0.770639 |
| PINK1-AS  | 0.521389 | -2.27136 | 0.023125 | 0.297235 | 0.914584 |
| ZSCAN16-  | 1.44251  | 2.19584  | 0.028103 | 1.040142 | 2.000531 |
| EPB41L4A- | 1.353094 | 2.156988 | 0.031007 | 1.028006 | 1.780984 |
| TRIM52-A  | 1.53284  | 2.147651 | 0.031741 | 1.038032 | 2.263512 |
| LINC00839 | 1.462265 | 2.120345 | 0.033977 | 1.029159 | 2.077638 |
| ASB16-AS  | 0.580598 | -2.11988 | 0.034016 | 0.351207 | 0.959815 |
| RGS5      | 1.304484 | 2.09526  | 0.036148 | 1.017312 | 1.672721 |
| LINC01023 | 1.364682 | 2.079744 | 0.037549 | 1.018068 | 1.829304 |
| SLC16A1-7 | 0.383245 | -2.06542 | 0.038883 | 0.154248 | 0.952212 |
| MBNL1-AS  | 0.522008 | -2.0399  | 0.04136  | 0.279523 | 0.974847 |
| LINC01315 | 0.578999 | -2.01446 | 0.043961 | 0.340233 | 0.985326 |
| RNF144A-  | 0.44389  | -1.9404  | 0.052331 | 0.195431 | 1.008221 |
| MCF2L-AS  | 0.475341 | -1.92128 | 0.054696 | 0.222591 | 1.015086 |
| TRAF3IP2- | 0.360138 | -1.87382 | 0.060955 | 0.123751 | 1.048069 |
| LINC00526 | 0.59665  | -1.87327 | 0.061031 | 0.347584 | 1.024187 |
| PCAT19    | 1.574921 | 1.853632 | 0.063792 | 0.974281 | 2.545852 |
| GHET1     | 0.54833  | -1.84693 | 0.064758 | 0.28981  | 1.03746  |
| ALMS1-IT1 | 0.529822 | -1.84324 | 0.065294 | 0.269644 | 1.041046 |
| KIAA0087  | 0.430699 | -1.82719 | 0.067671 | 0.174488 | 1.063121 |
| LINC00899 | 0.604138 | -1.76531 | 0.077512 | 0.345254 | 1.057142 |
| LINC00671 | 1.303467 | 1.752323 | 0.079718 | 0.969084 | 1.753231 |
| CLSTN2-A  | 0.187008 | -1.7453  | 0.080932 | 0.028455 | 1.229011 |
| DANCR     | 1.392538 | 1.742121 | 0.081487 | 0.95944  | 2.02114  |
| DDX11-AS  | 0.585043 | -1.71875 | 0.085661 | 0.317469 | 1.078137 |
| SH3BP5-A  | 0.525656 | -1.7115  | 0.086988 | 0.251685 | 1.097858 |
| USP30-AS  | 0.548476 | -1.70856 | 0.087532 | 0.275381 | 1.092399 |
| PPP3CB-A  | 0.550001 | -1.70506 | 0.088184 | 0.276638 | 1.093492 |
| HCG11     | 0.659631 | -1.68973 | 0.09108  | 0.407102 | 1.068806 |
| CCNT2-AS  | 0.592556 | -1.67649 | 0.093642 | 0.321388 | 1.092519 |
| SNAI3-AS  | 1.365453 | 1.646023 | 0.099759 | 0.942321 | 1.978582 |
| PSMD6-AS  | 0.26444  | -1.61937 | 0.105368 | 0.052864 | 1.322814 |
| PSORS1C3  | 0.181407 | -1.60847 | 0.107733 | 0.022662 | 1.452129 |
| HEIH      | 1.365192 | 1.607029 | 0.108048 | 0.933918 | 1.995622 |
| HCG18     | 0.349665 | -1.60476 | 0.108546 | 0.096894 | 1.261855 |
| BLACAT1   | 0.534349 | -1.59966 | 0.109675 | 0.247939 | 1.151608 |
| AGAP2-AS  | 1.355975 | 1.572601 | 0.115811 | 0.927735 | 1.98189  |
| MYLK-AS1  | 1.2906   | 1.553729 | 0.120249 | 0.935476 | 1.780537 |
| TRAM2-AS  | 0.648969 | -1.55053 | 0.121014 | 0.37572  | 1.120945 |
| SLC25A21  | 0.595131 | -1.54324 | 0.122773 | 0.307868 | 1.150434 |
| DKFZp779  | 1.295331 | 1.534913 | 0.124805 | 0.930849 | 1.802529 |
| TUSC8     | 1.298765 | 1.505191 | 0.132275 | 0.924056 | 1.82542  |
| DGCR9     | 0.608882 | -1.50337 | 0.132745 | 0.318878 | 1.162629 |
| SFTA1P    | 1.873386 | 1.494309 | 0.135095 | 0.822326 | 4.267864 |
| FGD5-AS1  | 0.670983 | -1.48516 | 0.137502 | 0.396298 | 1.136058 |
| LINC01426 | 1.180095 | 1.483155 | 0.138033 | 0.948156 | 1.468771 |
| LINC00472 | 0.565143 | -1.48216 | 0.138297 | 0.265718 | 1.201976 |

|             |          |          |          |          |          |
|-------------|----------|----------|----------|----------|----------|
| LINC0114C   | 0.567445 | -1.46929 | 0.141754 | 0.266483 | 1.208308 |
| PCAT6       | 1.297629 | 1.466423 | 0.142533 | 0.916048 | 1.838158 |
| ZNF883      | 1.219191 | 1.45753  | 0.14497  | 0.933963 | 1.591528 |
| CELF2-AS1   | 0.353082 | -1.40864 | 0.158941 | 0.082946 | 1.502987 |
| PSMG3-AS1   | 1.224679 | 1.39909  | 0.161786 | 0.921962 | 1.626791 |
| RBAKDN      | 1.196885 | 1.380401 | 0.167463 | 0.92732  | 1.544812 |
| MIAT        | 0.666307 | -1.36722 | 0.171557 | 0.37231  | 1.192461 |
| ACVR2B-AS1  | 0.623052 | -1.36603 | 0.171931 | 0.316016 | 1.228399 |
| CNTFR-AS1   | 0.395838 | -1.34914 | 0.177293 | 0.102994 | 1.521335 |
| TBX5-AS1    | 0.646969 | -1.33553 | 0.181702 | 0.341464 | 1.225806 |
| LINC00997   | 1.310588 | 1.322273 | 0.186077 | 0.877707 | 1.956964 |
| TTC28-AS1   | 0.686065 | -1.3149  | 0.188544 | 0.391251 | 1.203029 |
| PCBP1-AS1   | 0.366946 | -1.30833 | 0.190762 | 0.081724 | 1.647622 |
| STARD7-AS1  | 0.689604 | -1.30212 | 0.192876 | 0.394147 | 1.206538 |
| UNC5B-AS1   | 0.59871  | -1.28739 | 0.19796  | 0.274185 | 1.307345 |
| ARHGEF26    | 0.705121 | -1.28371 | 0.199243 | 0.413612 | 1.202082 |
| CDKN2B-AS1  | 0.662128 | -1.27485 | 0.202362 | 0.351283 | 1.248035 |
| C10orf95    | 1.381722 | 1.259144 | 0.207978 | 0.835303 | 2.285586 |
| LINC01278   | 0.724903 | -1.25395 | 0.209861 | 0.438422 | 1.198581 |
| RAB11B-AS1  | 1.225957 | 1.249458 | 0.211498 | 0.890612 | 1.687569 |
| SCAMP1-AS1  | 1.249429 | 1.246044 | 0.212748 | 0.880216 | 1.773511 |
| MIR17HG     | 0.654169 | -1.2317  | 0.218059 | 0.33297  | 1.285214 |
| CECR7       | 0.632974 | -1.21445 | 0.224577 | 0.302586 | 1.324109 |
| TRG-AS1     | 0.740497 | -1.2021  | 0.229325 | 0.453719 | 1.208535 |
| HLA-F-AS1   | 0.714497 | -1.19493 | 0.232115 | 0.411649 | 1.240149 |
| LINC00893   | 0.586413 | -1.1929  | 0.232907 | 0.243982 | 1.409449 |
| FLJ20021    | 1.169531 | 1.183389 | 0.236655 | 0.902337 | 1.515845 |
| FAM66D      | 0.617267 | -1.17981 | 0.238076 | 0.276946 | 1.375785 |
| HOXB-AS1    | 1.185576 | 1.172028 | 0.241186 | 0.891863 | 1.576016 |
| ARHGAP5     | 0.682641 | -1.15685 | 0.247335 | 0.3575   | 1.303493 |
| DGCR5       | 0.664555 | -1.14684 | 0.251447 | 0.330548 | 1.336063 |
| LINC00565   | 0.638193 | -1.13694 | 0.255562 | 0.294246 | 1.384182 |
| HOXD-AS1    | 1.169589 | 1.133256 | 0.257107 | 0.89201  | 1.533546 |
| LINC00337   | 1.226007 | 1.12594  | 0.260191 | 0.859904 | 1.747977 |
| SDCBP2-AS1  | 0.451524 | -1.11412 | 0.265226 | 0.11148  | 1.828794 |
| SOX9-AS1    | 0.725953 | -1.09459 | 0.273695 | 0.409122 | 1.288142 |
| LINC01281   | 0.742636 | -1.09298 | 0.274402 | 0.43556  | 1.266205 |
| RASSF8-AS1  | 0.624459 | -1.08577 | 0.277581 | 0.266907 | 1.460993 |
| N4BP2L2-AS1 | 0.53088  | -1.07252 | 0.283488 | 0.166895 | 1.688691 |
| PSMB8-AS1   | 0.768743 | -1.06716 | 0.285898 | 0.474248 | 1.246111 |
| FAM13A-AS1  | 0.711377 | -1.06218 | 0.288153 | 0.379481 | 1.333549 |
| DHRS4-AS1   | 0.711327 | -1.0572  | 0.290422 | 0.378283 | 1.337587 |
| LINC00909   | 0.79496  | -1.01644 | 0.309418 | 0.510724 | 1.237385 |
| TRPM2-AS1   | 1.215765 | 1.013482 | 0.31083  | 0.83322  | 1.773943 |
| RARA-AS1    | 1.165827 | 0.996054 | 0.319224 | 0.862018 | 1.576709 |
| ZMIZ1-AS1   | 0.76667  | -0.98677 | 0.323754 | 0.452287 | 1.299581 |
| SBF2-AS1    | 0.778855 | -0.98136 | 0.326415 | 0.472797 | 1.283035 |
| PARD3-AS1   | 1.256719 | 0.978486 | 0.327834 | 0.795167 | 1.986179 |
| MIR100HG    | 0.675813 | -0.9719  | 0.331099 | 0.306654 | 1.489372 |
| MIR210HG    | 1.170946 | 0.96867  | 0.33271  | 0.850868 | 1.611431 |
| ZBTB11-AS1  | 0.814627 | -0.96377 | 0.335159 | 0.536885 | 1.23605  |
| SERTAD4-AS1 | 0.815695 | -0.95472 | 0.339719 | 0.536909 | 1.239236 |
| SPATA13     | 0.779541 | -0.95175 | 0.341222 | 0.466768 | 1.301898 |
| LINC00886   | 1.152785 | 0.937736 | 0.34838  | 0.856423 | 1.551702 |
| FOXD3-AS1   | 0.749129 | -0.93645 | 0.349043 | 0.409267 | 1.371219 |
| DLGAP1-AS1  | 0.694645 | -0.93283 | 0.350907 | 0.323067 | 1.493598 |
| TMPO-AS1    | 0.766167 | -0.93189 | 0.351392 | 0.437554 | 1.341576 |
| KANSL1-AS1  | 1.151835 | 0.93087  | 0.351921 | 0.855326 | 1.551132 |

|           |          |          |          |          |          |
|-----------|----------|----------|----------|----------|----------|
| TIPARP-AS | 0.768641 | -0.9263  | 0.354288 | 0.44048  | 1.341284 |
| PP7080    | 1.177601 | 0.920709 | 0.357203 | 0.831497 | 1.667769 |
| TFAP2A-A  | 0.71493  | -0.91043 | 0.362595 | 0.347156 | 1.472322 |
| NR2F1-AS  | 1.22008  | 0.896469 | 0.370002 | 0.789798 | 1.884781 |
| AC005498  | 0.758026 | -0.88526 | 0.376014 | 0.410493 | 1.399788 |
| TPT1-AS1  | 0.788123 | -0.86775 | 0.385534 | 0.460291 | 1.349446 |
| LINC-PINT | 0.47006  | -0.86512 | 0.386974 | 0.084997 | 2.599589 |
| BDNF-AS   | 1.170591 | 0.860607 | 0.389455 | 0.817745 | 1.675687 |
| HOXA-AS   | 1.172112 | 0.853789 | 0.393222 | 0.814035 | 1.687702 |
| PITPNA-A  | 1.204045 | 0.850684 | 0.394945 | 0.784952 | 1.846894 |
| FAM83C-7  | 1.202341 | 0.850569 | 0.395009 | 0.786357 | 1.838381 |
| HOXC-AS   | 0.793798 | -0.83804 | 0.402008 | 0.462548 | 1.36227  |
| TMEM161   | 1.16244  | 0.831348 | 0.405777 | 0.815182 | 1.657628 |
| NOP14-AS  | 1.173285 | 0.827763 | 0.407805 | 0.803657 | 1.712916 |
| LINC00957 | 1.12357  | 0.825636 | 0.40901  | 0.852082 | 1.481559 |
| TYMSOS    | 0.841563 | -0.82432 | 0.409756 | 0.558428 | 1.268252 |
| THUMPD3   | 0.817929 | -0.81546 | 0.414807 | 0.504577 | 1.325879 |
| PAXBP1-A  | 0.701766 | -0.8146  | 0.415304 | 0.299311 | 1.645366 |
| ALDH1L1-  | 0.825298 | -0.80544 | 0.420565 | 0.517239 | 1.316832 |
| NADK2-AS  | 0.500997 | -0.7962  | 0.425914 | 0.091398 | 2.746203 |
| RMST      | 0.497901 | -0.7877  | 0.430872 | 0.087816 | 2.823025 |
| PRKCQ-AS  | 1.132941 | 0.779842 | 0.435484 | 0.827883 | 1.550406 |
| PCED1B-A  | 0.815205 | -0.77585 | 0.437836 | 0.486529 | 1.365919 |
| SNHG4     | 0.832789 | -0.77074 | 0.440861 | 0.522949 | 1.326207 |
| RBPMS-AS  | 1.158909 | 0.766547 | 0.443351 | 0.794846 | 1.689725 |
| PAXIP1-AS | 0.835543 | -0.76312 | 0.445395 | 0.526691 | 1.325507 |
| RHPN1-AS  | 1.164268 | 0.754546 | 0.450522 | 0.784292 | 1.728338 |
| MIR31HG   | 1.139486 | 0.753063 | 0.451412 | 0.811176 | 1.600674 |
| LINC0094  | 0.839949 | -0.74928 | 0.453689 | 0.532248 | 1.325537 |
| AP001063  | 0.793653 | -0.74799 | 0.454469 | 0.433142 | 1.454223 |
| GRIK1-AS  | 0.748864 | -0.7479  | 0.454523 | 0.350961 | 1.597892 |
| ARHGEF7-  | 1.117459 | 0.744408 | 0.45663  | 0.834146 | 1.496997 |
| UBL7-AS1  | 0.829759 | -0.73954 | 0.459582 | 0.506002 | 1.360664 |
| RAD51-AS  | 1.162042 | 0.737832 | 0.460617 | 0.779772 | 1.731712 |
| STAU2-AS  | 0.772125 | -0.72967 | 0.465594 | 0.385481 | 1.546577 |
| LINC00892 | 0.847741 | -0.72874 | 0.466158 | 0.543658 | 1.321905 |
| DLG5-AS1  | 0.832903 | -0.72483 | 0.468558 | 0.508017 | 1.365559 |
| ATP1A1-A  | 0.718578 | -0.7105  | 0.477395 | 0.288766 | 1.78814  |
| LPP-AS2   | 0.871164 | -0.70721 | 0.479439 | 0.594416 | 1.276758 |
| LINC01354 | 1.123268 | 0.703022 | 0.482042 | 0.812344 | 1.553198 |
| FGF14-AS  | 0.843227 | -0.69767 | 0.485383 | 0.522277 | 1.361408 |
| LINC01018 | 1.153081 | 0.696235 | 0.486281 | 0.772181 | 1.721869 |
| MAP3K14-  | 0.857984 | -0.69541 | 0.486797 | 0.55718  | 1.321183 |
| SEC24B-A  | 0.841141 | -0.69527 | 0.486889 | 0.516502 | 1.369825 |
| SSSCA1-A  | 1.13157  | 0.691617 | 0.489178 | 0.797176 | 1.606232 |
| LINC01085 | 0.708103 | -0.68728 | 0.491906 | 0.264611 | 1.8949   |
| TAPT1-AS  | 1.111403 | 0.680059 | 0.496467 | 0.819723 | 1.506871 |
| LINC00624 | 0.757745 | -0.67043 | 0.502586 | 0.336755 | 1.70503  |
| PGM5-AS   | 1.103893 | 0.669112 | 0.503424 | 0.82639  | 1.474584 |
| IGF2-AS   | 0.084781 | -0.66793 | 0.504181 | 6.07E-05 | 118.3327 |
| NFYC-AS1  | 0.839277 | -0.64183 | 0.52098  | 0.491514 | 1.433094 |
| TMEM191   | 0.869598 | -0.63564 | 0.525014 | 0.565208 | 1.337915 |
| LINC00174 | 0.736544 | -0.62973 | 0.528873 | 0.284359 | 1.907787 |
| ADIRF-AS  | 0.849973 | -0.62969 | 0.528898 | 0.512474 | 1.409737 |
| RBM26-AS  | 1.124181 | 0.606908 | 0.543912 | 0.770309 | 1.640618 |
| PHEX-AS1  | 0.83109  | -0.59411 | 0.552439 | 0.451406 | 1.530131 |
| ST7-OT4   | 4.40E-11 | -0.5935  | 0.552845 | 2.77E-45 | 6.99E+23 |
| LINC01144 | 1.115495 | 0.589287 | 0.555669 | 0.775516 | 1.604518 |

|           |          |          |          |          |          |
|-----------|----------|----------|----------|----------|----------|
| FAM201A   | 1.115673 | 0.585796 | 0.558012 | 0.773549 | 1.609111 |
| NCBP2-AS  | 0.883107 | -0.58547 | 0.558231 | 0.582483 | 1.338885 |
| LINC00968 | 0.227185 | -0.58355 | 0.559526 | 0.001565 | 32.96984 |
| LINC00853 | 1.105405 | 0.580864 | 0.561332 | 0.788261 | 1.550147 |
| AC024560  | 0.879173 | -0.5649  | 0.572142 | 0.562389 | 1.374398 |
| USP46-AS  | 0.887637 | -0.5604  | 0.575207 | 0.585049 | 1.346725 |
| PWAR6     | 0.817009 | -0.55796 | 0.576874 | 0.4017   | 1.661698 |
| MAN2C1    | 0.871772 | -0.55278 | 0.580416 | 0.535909 | 1.418126 |
| TP73-AS1  | 1.116078 | 0.536247 | 0.591788 | 0.747089 | 1.667312 |
| ACTA2-AS  | 0.853154 | -0.53582 | 0.59208  | 0.477239 | 1.525171 |
| GLIDR     | 0.872651 | -0.52787 | 0.59759  | 0.52624  | 1.447097 |
| PTPRG-AS  | 0.870707 | -0.52593 | 0.598937 | 0.519751 | 1.458641 |
| LINC00324 | 1.102947 | 0.521828 | 0.60179  | 0.763345 | 1.593632 |
| LINC01206 | 0.869755 | -0.51965 | 0.603311 | 0.51383  | 1.472228 |
| RAP2C-AS  | 0.859903 | -0.5149  | 0.606621 | 0.484097 | 1.527447 |
| WDR86-A   | 1.074575 | 0.5052   | 0.613418 | 0.812927 | 1.420436 |
| APTR      | 0.913145 | -0.49499 | 0.62061  | 0.637222 | 1.308544 |
| FGF13-AS  | 0.899377 | -0.49101 | 0.623419 | 0.588968 | 1.373384 |
| SNHG17    | 0.895242 | -0.48974 | 0.624321 | 0.574914 | 1.394049 |
| DLEU2     | 0.887213 | -0.48919 | 0.624708 | 0.549285 | 1.433037 |
| RAPGEF4-  | 0.486194 | -0.4837  | 0.628599 | 0.026167 | 9.03371  |
| TPTEP1    | 1.105806 | 0.482132 | 0.629712 | 0.734708 | 1.664345 |
| AC144652  | 0.899209 | -0.47474 | 0.634972 | 0.579929 | 1.394269 |
| ENTPD3-A  | 1.104065 | 0.472433 | 0.636618 | 0.732191 | 1.66481  |
| LINC00894 | 0.791234 | -0.46875 | 0.639246 | 0.297231 | 2.106278 |
| FAM222A-  | 1.076442 | 0.459649 | 0.645768 | 0.786286 | 1.473672 |
| ITGA9-AS  | 0.891422 | -0.45623 | 0.648222 | 0.544056 | 1.460573 |
| FGF10-AS  | 1.083983 | 0.452331 | 0.651031 | 0.76431  | 1.537358 |
| NPTN-IT1  | 0.676362 | -0.45023 | 0.652547 | 0.123283 | 3.710695 |
| ERVH48-1  | 0.223556 | -0.44316 | 0.657647 | 0.000296 | 168.5896 |
| CKMT2-AS  | 0.896842 | -0.4315  | 0.666104 | 0.546944 | 1.470583 |
| ST7-AS2   | 3.11E-25 | -0.4299  | 0.667272 | #####    | 1.68E+87 |
| ASH1L-AS  | 1.084646 | 0.426417 | 0.669804 | 0.746608 | 1.575735 |
| XIST      | 0.635375 | -0.42421 | 0.671416 | 0.078157 | 5.165277 |
| LDLRAD4-  | 0.7639   | -0.41685 | 0.676791 | 0.215321 | 2.710103 |
| C6orf99   | 1.115149 | 0.410201 | 0.681658 | 0.662481 | 1.877124 |
| C14orf132 | 1.074646 | 0.400983 | 0.688433 | 0.755863 | 1.527875 |
| ZFAS1     | 1.081514 | 0.397977 | 0.690647 | 0.73524  | 1.590873 |
| KCNQ1-A   | 0.900743 | -0.39721 | 0.691213 | 0.537757 | 1.508744 |
| OGFRP1    | 0.893999 | -0.39375 | 0.693767 | 0.511808 | 1.561589 |
| FTX       | 0.667157 | -0.38746 | 0.698417 | 0.086116 | 5.168614 |
| PWAR5     | 0.609506 | -0.37355 | 0.70874  | 0.045372 | 8.18785  |
| TTLL7-IT1 | 0.78427  | -0.37259 | 0.709455 | 0.218429 | 2.815923 |
| MAPKAPK   | 0.920387 | -0.36626 | 0.71417  | 0.590428 | 1.434743 |
| HOTAIR    | 1.074152 | 0.355533 | 0.72219  | 0.724116 | 1.593394 |
| DICER1-A  | 0.921692 | -0.35223 | 0.724665 | 0.585501 | 1.450924 |
| ZNF582-A  | 1.074446 | 0.338783 | 0.734773 | 0.709207 | 1.627781 |
| EPN2-AS1  | 0.606558 | -0.33141 | 0.740332 | 0.031535 | 11.6669  |
| IQCH-AS1  | 0.933928 | -0.31415 | 0.753406 | 0.609677 | 1.430628 |
| LINC00665 | 0.943267 | -0.31006 | 0.756518 | 0.652065 | 1.364514 |
| DOCK4-A   | 0.527874 | -0.30716 | 0.758721 | 0.008954 | 31.1201  |
| MNX1-AS   | 1.06842  | 0.305615 | 0.759897 | 0.6989   | 1.633312 |
| TMEM75    | 0.463717 | -0.30558 | 0.759925 | 0.003355 | 64.10303 |
| COX10-AS  | 0.925089 | -0.30325 | 0.7617   | 0.559268 | 1.530196 |
| C17orf100 | 0.924909 | -0.29179 | 0.77045  | 0.547498 | 1.562485 |
| VPS9D1-A  | 0.940709 | -0.27635 | 0.782278 | 0.609808 | 1.451167 |
| LINC01267 | 0.946462 | -0.27539 | 0.783013 | 0.639781 | 1.400152 |
| MEG3      | 0.839582 | -0.26814 | 0.78859  | 0.233887 | 3.013836 |

|           |          |          |          |          |          |
|-----------|----------|----------|----------|----------|----------|
| ELOVL2-A  | 0.9525   | -0.26009 | 0.794797 | 0.660078 | 1.374469 |
| CTBP1-AS  | 1.058413 | 0.257063 | 0.79713  | 0.686553 | 1.631684 |
| LINC00115 | 0.941046 | -0.25705 | 0.79714  | 0.592105 | 1.495626 |
| AC067956  | 1.046    | 0.25305  | 0.80023  | 0.738333 | 1.481872 |
| AFAP1-AS  | 1.046234 | 0.248245 | 0.803945 | 0.732241 | 1.494869 |
| NEBL-AS1  | 1.05148  | 0.241904 | 0.808854 | 0.700105 | 1.579207 |
| LINC01215 | 0.946871 | -0.2373  | 0.812421 | 0.60321  | 1.486321 |
| SHANK3    | 1.049053 | 0.228058 | 0.819601 | 0.695122 | 1.583193 |
| MATN1-A   | 1.041264 | 0.227102 | 0.820345 | 0.73452  | 1.476109 |
| PTOV1-AS  | 0.94943  | -0.22568 | 0.821452 | 0.604968 | 1.490024 |
| OIP5-AS1  | 1.047807 | 0.218045 | 0.827394 | 0.688614 | 1.594361 |
| RPARP-AS  | 0.937028 | -0.2154  | 0.829452 | 0.518473 | 1.693473 |
| RNASEH1-  | 0.959807 | -0.21331 | 0.831087 | 0.658387 | 1.399222 |
| AC006538  | 0.95348  | -0.20572 | 0.837006 | 0.605631 | 1.501118 |
| HCG9      | 0.943723 | -0.20479 | 0.837734 | 0.542119 | 1.642837 |
| KCNJ2-AS  | 1.038352 | 0.204499 | 0.837964 | 0.723927 | 1.489342 |
| MED14OS   | 1.052832 | 0.188041 | 0.850845 | 0.615612 | 1.800575 |
| TTLL11-IT | 0.958996 | -0.17611 | 0.860211 | 0.601793 | 1.528222 |
| WEE2-AS1  | 0.963135 | -0.17029 | 0.864779 | 0.625083 | 1.484009 |
| RNF139-A  | 0.963615 | -0.16205 | 0.87127  | 0.615484 | 1.508657 |
| WFDC21P   | 1.031787 | 0.159971 | 0.872904 | 0.703208 | 1.513896 |
| GAS5-AS1  | 1.034169 | 0.157347 | 0.874971 | 0.68051  | 1.571623 |
| GAS5      | 1.032304 | 0.155289 | 0.876594 | 0.691095 | 1.541974 |
| LINC01186 | 1.021578 | 0.146648 | 0.88341  | 0.767989 | 1.358902 |
| SMCR5     | 0.209398 | -0.14061 | 0.888178 | 7.18E-11 | 6.11E+08 |
| RAMP2-AS  | 0.976205 | -0.13842 | 0.889905 | 0.694152 | 1.372866 |
| LINC00654 | 0.964579 | -0.138   | 0.890238 | 0.577964 | 1.609812 |
| KMT2E-AS  | 1.02433  | 0.12549  | 0.900135 | 0.703694 | 1.491064 |
| PART1     | 0.978557 | -0.10741 | 0.914463 | 0.658884 | 1.453328 |
| FOXD2-AS  | 1.021065 | 0.104394 | 0.916857 | 0.690369 | 1.510169 |
| RBMS3-AS  | 1.021844 | 0.103798 | 0.91733  | 0.679482 | 1.536709 |
| LINC01094 | 0.981886 | -0.09417 | 0.924972 | 0.671164 | 1.436458 |
| LINC01128 | 0.982024 | -0.08994 | 0.928335 | 0.661375 | 1.458131 |
| LINC00862 | 0.972986 | -0.08811 | 0.92979  | 0.529108 | 1.789241 |
| LINC00641 | 0.978772 | -0.08591 | 0.931536 | 0.599917 | 1.596878 |
| KRTAP5-A  | 0.981271 | -0.08585 | 0.931584 | 0.63728  | 1.51094  |
| CIRBP-AS1 | 0.983357 | -0.08538 | 0.931959 | 0.668946 | 1.445544 |
| SNHG10    | 0.98259  | -0.07213 | 0.942501 | 0.609678 | 1.583595 |
| LIPE-AS1  | 1.013972 | 0.071213 | 0.943229 | 0.692104 | 1.485529 |
| MAGI2-AS  | 0.983892 | -0.06832 | 0.94553  | 0.617494 | 1.567697 |
| LINC00173 | 1.014066 | 0.06573  | 0.947593 | 0.668633 | 1.537958 |
| USP27X-A  | 1.013718 | 0.061072 | 0.951302 | 0.65467  | 1.569683 |
| MIR205HC  | 0.98574  | -0.05765 | 0.954029 | 0.604899 | 1.606355 |
| LINC00993 | 1.008905 | 0.040317 | 0.967841 | 0.655659 | 1.552467 |
| CRNDE     | 1.009084 | 0.039731 | 0.968307 | 0.645944 | 1.576376 |
| ZFH4-AS   | 0.989864 | -0.03197 | 0.974494 | 0.530082 | 1.84845  |
| SENCR     | 1.006951 | 0.03154  | 0.974839 | 0.65473  | 1.548655 |
| AC017002  | 0.995216 | -0.03085 | 0.97539  | 0.73383  | 1.349705 |
| LINC00643 | 0.994166 | -0.02704 | 0.978428 | 0.650509 | 1.519372 |
| LINC00920 | 1.004928 | 0.026208 | 0.979091 | 0.695788 | 1.451419 |
| LINC00910 | 0.996409 | -0.01742 | 0.986098 | 0.664825 | 1.493373 |
| ST8SIA6-A | 1.002387 | 0.011002 | 0.991222 | 0.655544 | 1.532742 |
| ITGB2-AS1 | 0.99833  | -0.00808 | 0.99355  | 0.665663 | 1.497247 |
| LINC00626 | 0.99586  | -0.00652 | 0.994801 | 0.285944 | 3.468292 |
