# Supplementary material for: Development of a Prognostic Model Based on the Identification of EMT-Related lncRNAs in Triple-Negative Breast Cancer
Source: Hindawi journal article supplement (doi:10.1155/2021/9219961), 2021-11-27
Supplement: f1 [file 9219961.f1.zip]

| lncRNA    | Gene   | cor      | p        |
|-----------|--------|----------|----------|
| A2M-AS1   | CXCL12 | 0.599261 | ≤0.0001  |
| A2M-AS1   | FZD4   | 0.716116 | ≤0.0001  |
| A2M-AS1   | FGF2   | 0.66626  | ≤0.0001  |
| A2M-AS1   | TWIST2 | 0.573254 | ≤0.0001  |
| A2M-AS1   | ZEB1   | 0.630537 | ≤0.0001  |
| A2M-AS1   | BIRC5  | -0.42302 | 3.11E-13 |
| A2M-AS1   | TWIST1 | 0.370966 | 2.67E-10 |
| AADACL2   | CDH2   | 0.342182 | 6.90E-09 |
| AATBC     | CXCL12 | -0.30562 | 2.74E-07 |
| AATBC     | TWIST2 | -0.30165 | 3.96E-07 |
| AATBC     | FGF2   | -0.30018 | 4.54E-07 |
| ABCA9-AS1 | ZEB1   | 0.341824 | 7.17E-09 |
| AC000067  | TGFB1  | 0.582103 | ≤0.0001  |
| AC000123  | ZEB1   | 0.354847 | 1.72E-09 |
| AC002066  | FZD4   | 0.67322  | ≤0.0001  |
| AC002066  | FGF2   | 0.528305 | ≤0.0001  |
| AC002066  | TWIST2 | 0.596621 | ≤0.0001  |
| AC002066  | ZEB1   | 0.692337 | ≤0.0001  |
| AC002066  | CXCL12 | 0.379329 | 9.76E-11 |
| AC002066  | TWIST1 | 0.373554 | 1.96E-10 |
| AC002066  | BIRC5  | -0.30984 | 1.83E-07 |
| AC002401  | CDH2   | 0.346139 | 4.50E-09 |
| AC003984  | FZD4   | 0.452435 | 4.00E-15 |
| AC003984  | TWIST2 | 0.404423 | 3.98E-12 |
| AC003984  | ZEB1   | 0.381558 | 7.42E-11 |
| AC003984  | FGF2   | 0.353464 | 2.01E-09 |
| AC003985  | TGFB1  | 0.467855 | 4.44E-16 |
| AC004053  | EGF    | 0.312222 | 1.46E-07 |
| AC004490  | FZD4   | 0.774386 | ≤0.0001  |
| AC004490  | FGF2   | 0.62757  | ≤0.0001  |
| AC004490  | TWIST2 | 0.689636 | ≤0.0001  |
| AC004490  | ZEB1   | 0.678358 | ≤0.0001  |
| AC004490  | TWIST1 | 0.595684 | ≤0.0001  |
| AC004490  | CXCL12 | 0.43902  | 3.04E-14 |
| AC004490  | BIRC5  | -0.35975 | 9.86E-10 |
| AC004637  | PDGFB  | 0.368165 | 3.72E-10 |
| AC004947  | CXCL12 | 0.691953 | ≤0.0001  |
| AC004947  | BIRC5  | -0.53898 | ≤0.0001  |
| AC004947  | FZD4   | 0.587734 | ≤0.0001  |
| AC004947  | FGF2   | 0.567225 | ≤0.0001  |
| AC004947  | TWIST2 | 0.528549 | ≤0.0001  |
| AC004947  | ZEB1   | 0.56693  | ≤0.0001  |
| AC004947  | TWIST1 | 0.344455 | 5.40E-09 |
| AC004947  | CXCR4  | -0.31614 | 9.98E-08 |
| AC005256  | HIF1A  | 0.309685 | 1.86E-07 |
| AC005394  | CDH2   | 0.338955 | 9.75E-09 |
| AC005498  | BIRC5  | -0.44939 | 6.22E-15 |
| AC005498  | CXCL12 | 0.374939 | 1.66E-10 |
| AC005592  | ZEB1   | 0.417256 | 6.97E-13 |
| AC006041  | ZEB1   | 0.300881 | 4.26E-07 |
| AC006150  | CDH2   | 0.351672 | 2.45E-09 |
| AC006378  | BIRC5  | -0.37736 | 1.24E-10 |
| AC006378  | ZEB1   | 0.315508 | 1.06E-07 |
| AC006538  | BIRC5  | 0.454771 | 2.66E-15 |
| AC006538  | ZEB1   | -0.4234  | 2.95E-13 |
| AC006538  | CXCL12 | -0.40447 | 3.96E-12 |
| AC006538  | FGF2   | -0.37989 | 9.11E-11 |

|                 |          |          |
|-----------------|----------|----------|
| AC006538 FZD4   | -0.3552  | 1.65E-09 |
| AC006840 CDH2   | 0.353558 | 1.98E-09 |
| AC007098 CDH2   | 0.37287  | 2.13E-10 |
| AC007106 HIF1A  | 0.373323 | 2.02E-10 |
| AC007364 ZEB1   | 0.332788 | 1.86E-08 |
| AC007557 CDH2   | 0.305657 | 2.73E-07 |
| AC007563 BIRC5  | -0.38047 | 8.49E-11 |
| AC007563 CXCL12 | 0.363007 | 6.78E-10 |
| AC007563 FZD4   | 0.352754 | 2.17E-09 |
| AC007563 ZEB1   | 0.332218 | 1.98E-08 |
| AC007563 FGF2   | 0.323294 | 4.91E-08 |
| AC007563 BIRC5  | -0.38163 | 7.36E-11 |
| AC007563 CXCL12 | 0.359853 | 9.74E-10 |
| AC007563 FZD4   | 0.343218 | 6.18E-09 |
| AC007563 ZEB1   | 0.324818 | 4.21E-08 |
| AC007563 FGF2   | 0.319947 | 6.86E-08 |
| AC007743 CXCL12 | 0.540552 | ≤0.0001  |
| AC007743 FZD4   | 0.714723 | ≤0.0001  |
| AC007743 FGF2   | 0.59979  | ≤0.0001  |
| AC007743 TWIST2 | 0.517451 | ≤0.0001  |
| AC007743 ZEB1   | 0.66224  | ≤0.0001  |
| AC007743 BIRC5  | -0.37768 | 1.19E-10 |
| AC007792 ZEB1   | 0.432508 | 7.95E-14 |
| AC007792 FZD4   | 0.355322 | 1.63E-09 |
| AC007792 CXCL12 | 0.321641 | 5.79E-08 |
| AC007792 FGF2   | 0.301412 | 4.05E-07 |
| AC007950 ZEB1   | 0.35372  | 1.95E-09 |
| AC007952 CDH2   | 0.336449 | 1.27E-08 |
| AC008175 CXCR4  | 0.30999  | 1.81E-07 |
| AC008268 BIRC5  | -0.44183 | 2.00E-14 |
| AC008268 EGF    | 0.416397 | 7.85E-13 |
| AC008268 CXCL12 | 0.362826 | 6.93E-10 |
| AC008937 ZEB1   | 0.389245 | 2.85E-11 |
| AC008991 FZD4   | 0.598427 | ≤0.0001  |
| AC008991 FGF2   | 0.53697  | ≤0.0001  |
| AC008991 TWIST2 | 0.488322 | ≤0.0001  |
| AC008991 ZEB1   | 0.548559 | ≤0.0001  |
| AC008991 CXCL12 | 0.464987 | 4.44E-16 |
| AC008991 TWIST1 | 0.397138 | 1.04E-11 |
| AC008991 BIRC5  | -0.35785 | 1.22E-09 |
| AC009110 CDH2   | 0.354216 | 1.84E-09 |
| AC009120 CDH2   | 0.350006 | 2.95E-09 |
| AC009299 TWIST2 | 0.354016 | 1.89E-09 |
| AC009299 EGF    | 0.312216 | 1.46E-07 |
| AC009495 EGF    | 0.358247 | 1.17E-09 |
| AC009495 TWIST2 | -0.40095 | 6.30E-12 |
| AC009495 FZD4   | -0.33384 | 1.67E-08 |
| AC009495 TWIST1 | -0.30975 | 1.85E-07 |
| AC009498 CXCL12 | 0.369295 | 3.25E-10 |
| AC009506 BIRC5  | -0.45248 | 4.00E-15 |
| AC009506 CXCL12 | 0.331815 | 2.06E-08 |
| AC009506 EGF    | 0.329427 | 2.64E-08 |
| AC009506 SNAI1  | -0.31354 | 1.28E-07 |
| AC010468 CDH2   | 0.319502 | 7.17E-08 |
| AC010731 ZEB1   | 0.348996 | 3.29E-09 |
| AC010731 CDH2   | 0.338948 | 9.75E-09 |
| AC010745 EGF    | 0.645447 | ≤0.0001  |
| AC010745 BIRC5  | -0.3973  | 1.01E-11 |

|                 |          |          |
|-----------------|----------|----------|
| AC010745 CXCL12 | 0.397099 | 1.04E-11 |
| AC010969 CXCL12 | 0.494305 | ≤0.0001  |
| AC010969 FZD4   | 0.698896 | ≤0.0001  |
| AC010969 FGF2   | 0.536258 | ≤0.0001  |
| AC010969 TWIST2 | 0.607379 | ≤0.0001  |
| AC010969 ZEB1   | 0.622988 | ≤0.0001  |
| AC010969 BIRC5  | -0.35814 | 1.18E-09 |
| AC010975 CDH2   | 0.423589 | 2.87E-13 |
| AC010976 CXCL12 | 0.481617 | ≤0.0001  |
| AC010976 FZD4   | 0.542955 | ≤0.0001  |
| AC010976 ZEB1   | 0.488806 | ≤0.0001  |
| AC010976 TWIST2 | 0.452798 | 3.77E-15 |
| AC010976 FGF2   | 0.387026 | 3.76E-11 |
| AC010976 BIRC5  | -0.35959 | 1.00E-09 |
| AC010976 TWIST1 | 0.322035 | 5.57E-08 |
| AC011239 ZEB1   | 0.410366 | 1.79E-12 |
| AC011306 FZD4   | 0.601022 | ≤0.0001  |
| AC011306 FGF2   | 0.480363 | ≤0.0001  |
| AC011306 ZEB1   | 0.570924 | ≤0.0001  |
| AC011306 TWIST2 | 0.420983 | 4.14E-13 |
| AC011306 CXCL12 | 0.4011   | 6.18E-12 |
| AC011306 BIRC5  | -0.34121 | 7.66E-09 |
| AC011524 CXCL12 | 0.343734 | 5.84E-09 |
| AC011524 ZEB1   | 0.330082 | 2.46E-08 |
| AC011524 CXCL12 | 0.304129 | 3.15E-07 |
| AC011625 FZD4   | 0.452334 | 4.00E-15 |
| AC011625 TWIST2 | 0.386861 | 3.84E-11 |
| AC011625 ZEB1   | 0.354991 | 1.69E-09 |
| AC011625 FGF2   | 0.337653 | 1.12E-08 |
| AC011995 FZD4   | 0.390322 | 2.48E-11 |
| AC011995 TWIST2 | 0.365759 | 4.93E-10 |
| AC011998 TGFB1  | 0.362603 | 7.11E-10 |
| AC012368 EGF    | 0.448816 | 6.88E-15 |
| AC012368 BIRC5  | -0.315   | 1.11E-07 |
| AC012462 TGFB1  | 0.437714 | 3.69E-14 |
| AC012462 CDH2   | 0.32201  | 5.58E-08 |
| AC012462 TGFB1  | 0.358957 | 1.08E-09 |
| AC012613 ZEB1   | 0.461185 | 8.88E-16 |
| AC013448 CDH2   | 0.349826 | 3.00E-09 |
| AC016644 CDH2   | 0.343345 | 6.09E-09 |
| AC016716 CDH2   | 0.439237 | 2.95E-14 |
| AC016910 ZEB1   | 0.533725 | ≤0.0001  |
| AC016910 FZD4   | 0.362178 | 7.46E-10 |
| AC016910 FGF2   | 0.3442   | 5.55E-09 |
| AC016910 CXCL12 | 0.329965 | 2.49E-08 |
| AC016910 BIRC5  | -0.30194 | 3.86E-07 |
| AC017002 CXCL12 | -0.30139 | 4.06E-07 |
| AC018685 CDH2   | 0.319786 | 6.97E-08 |
| AC018685 HIF1A  | 0.337512 | 1.14E-08 |
| AC022182 CXCL12 | -0.30981 | 1.84E-07 |
| AC022182 FGF2   | -0.30831 | 2.12E-07 |
| AC022182 BIRC5  | 0.308296 | 2.13E-07 |
| AC024028 CDH2   | 0.351597 | 2.47E-09 |
| AC024560 TWIST2 | -0.32543 | 3.96E-08 |
| AC024560 FZD4   | -0.30921 | 1.95E-07 |
| AC026904 TGFB1  | 0.479873 | ≤0.0001  |
| AC027601 BIRC5  | 0.332001 | 2.02E-08 |
| AC034228 SNAI1  | 0.309977 | 1.81E-07 |

|                 |          |          |
|-----------------|----------|----------|
| AC055764 CDH2   | 0.354642 | 1.76E-09 |
| AC062017 TWIST2 | 0.526199 | ≤0.0001  |
| AC062017 FZD4   | 0.453022 | 3.55E-15 |
| AC062017 TWIST1 | 0.395845 | 1.23E-11 |
| AC062017 FGF2   | 0.313914 | 1.24E-07 |
| AC062017 HIF1A  | -0.30249 | 3.67E-07 |
| AC064834 CDH2   | 0.330587 | 2.34E-08 |
| AC067956 CDH2   | 0.357475 | 1.28E-09 |
| AC068057 EGF    | 0.515871 | ≤0.0001  |
| AC068057 BIRC5  | -0.42513 | 2.30E-13 |
| AC068057 CXCL12 | 0.357839 | 1.23E-09 |
| AC068489 CDH2   | 0.317342 | 8.87E-08 |
| AC073130 ZEB1   | 0.348173 | 3.60E-09 |
| AC073130 ZEB1   | 0.532268 | ≤0.0001  |
| AC073130 FZD4   | 0.434959 | 5.55E-14 |
| AC073130 TWIST2 | 0.405714 | 3.35E-12 |
| AC073130 CXCL12 | 0.365532 | 5.06E-10 |
| AC073130 BIRC5  | -0.33675 | 1.23E-08 |
| AC073130 FGF2   | 0.331137 | 2.21E-08 |
| AC073316 CDH2   | 0.31789  | 8.40E-08 |
| AC073316 ZEB1   | 0.415467 | 8.93E-13 |
| AC073409 HIF1A  | 0.380382 | 8.58E-11 |
| AC073409 SNAI1  | 0.305458 | 2.78E-07 |
| AC073626 CDH2   | 0.353102 | 2.09E-09 |
| AC073636 BIRC5  | -0.35208 | 2.34E-09 |
| AC073636 EGF    | 0.347941 | 3.70E-09 |
| AC073636 ZEB1   | 0.330603 | 2.33E-08 |
| AC073636 CXCL12 | 0.324919 | 4.17E-08 |
| AC074286 CXCL12 | 0.555042 | ≤0.0001  |
| AC074286 BIRC5  | -0.44238 | 1.84E-14 |
| AC074286 EGF    | 0.40291  | 4.87E-12 |
| AC074286 ZEB1   | 0.349293 | 3.19E-09 |
| AC079154 CDH2   | 0.349806 | 3.01E-09 |
| AC079354 CXCL12 | -0.43268 | 7.77E-14 |
| AC079354 BIRC5  | 0.382095 | 6.95E-11 |
| AC079354 ZEB1   | -0.35993 | 9.66E-10 |
| AC079354 FZD4   | -0.31792 | 8.38E-08 |
| AC079354 FGF2   | -0.31469 | 1.15E-07 |
| AC079354 TWIST2 | -0.30741 | 2.31E-07 |
| AC083843 EGF    | 0.384259 | 5.32E-11 |
| AC083843 BIRC5  | -0.32371 | 4.71E-08 |
| AC083900 ZEB1   | 0.352387 | 2.26E-09 |
| AC084125 BIRC5  | 0.41439  | 1.04E-12 |
| AC084125 CXCL12 | -0.38255 | 6.57E-11 |
| AC084125 FGF2   | -0.3498  | 3.01E-09 |
| AC084125 ZEB1   | -0.34499 | 5.10E-09 |
| AC084125 FZD4   | -0.34001 | 8.71E-09 |
| AC090616 CDH2   | 0.410229 | 1.83E-12 |
| AC092162 ZEB1   | 0.383967 | 5.51E-11 |
| AC092162 CXCL12 | 0.3209   | 6.24E-08 |
| AC092168 CDH2   | 0.306561 | 2.50E-07 |
| AC092171 FGF2   | -0.33356 | 1.72E-08 |
| AC092171 ZEB1   | -0.3123  | 1.45E-07 |
| AC092171 FGF2   | -0.37813 | 1.13E-10 |
| AC092171 CXCL12 | -0.3417  | 7.27E-09 |
| AC092171 FZD4   | -0.31317 | 1.33E-07 |
| AC092535 CDH2   | 0.300512 | 4.41E-07 |
| AC092687 ZEB1   | -0.38829 | 3.21E-11 |

|                 |          |          |
|-----------------|----------|----------|
| AC092687 CXCL12 | -0.37969 | 9.34E-11 |
| AC092687 BIRC5  | 0.361663 | 7.92E-10 |
| AC092687 FZD4   | -0.33027 | 2.42E-08 |
| AC092687 FGF2   | -0.32402 | 4.57E-08 |
| AC093382 EGF    | 0.348769 | 3.37E-09 |
| AC093382 BIRC5  | -0.31035 | 1.75E-07 |
| AC093484 CDH2   | 0.35706  | 1.34E-09 |
| AC093843 CDH2   | 0.348099 | 3.63E-09 |
| AC098617 ZEB1   | 0.372869 | 2.13E-10 |
| AC099754 EGF    | 0.41672  | 7.51E-13 |
| AC099754 BIRC5  | -0.33113 | 2.21E-08 |
| AC099754 CXCL12 | 0.308809 | 2.02E-07 |
| AC104781 CDH2   | 0.359554 | 1.01E-09 |
| AC104794 CXCL12 | 0.413997 | 1.09E-12 |
| AC105760 CXCL12 | 0.475126 | ≤0.0001  |
| AC105760 BIRC5  | -0.50829 | ≤0.0001  |
| AC105760 ZEB1   | 0.440122 | 2.58E-14 |
| AC105760 EGF    | 0.41764  | 6.61E-13 |
| AC105760 FGF2   | 0.393366 | 1.69E-11 |
| AC105760 SNAI1  | -0.31696 | 9.21E-08 |
| AC108025 CXCL12 | -0.42545 | 2.20E-13 |
| AC108025 BIRC5  | 0.407843 | 2.52E-12 |
| AC108025 FGF2   | -0.38715 | 3.71E-11 |
| AC108025 FZD4   | -0.31937 | 7.26E-08 |
| AC108025 TWIST2 | -0.31305 | 1.35E-07 |
| AC108142 CDH2   | 0.354514 | 1.78E-09 |
| AC113167 ZEB1   | 0.356018 | 1.51E-09 |
| AC114752 CDH2   | 0.344035 | 5.65E-09 |
| AC116035 CXCL12 | 0.339665 | 9.04E-09 |
| AC116035 ZEB1   | 0.311657 | 1.54E-07 |
| AC116035 FZD4   | 0.305472 | 2.78E-07 |
| AC133785 CXCL12 | -0.34004 | 8.68E-09 |
| AC133785 ZEB1   | -0.30336 | 3.38E-07 |
| AC133785 HIF1A  | 0.302745 | 3.58E-07 |
| AC135050 ZEB1   | 0.349249 | 3.20E-09 |
| AC138035 EGF    | 0.323323 | 4.90E-08 |
| AC139887 ZEB1   | 0.304163 | 3.14E-07 |
| AC144652 CXCL12 | -0.36109 | 8.45E-10 |
| AC144652 ZEB1   | -0.30192 | 3.87E-07 |
| AC144831 CXCL12 | 0.48094  | ≤0.0001  |
| AC144831 FZD4   | 0.483715 | ≤0.0001  |
| AC144831 TWIST2 | 0.490449 | ≤0.0001  |
| AC144831 ZEB1   | 0.486792 | ≤0.0001  |
| AC144831 FGF2   | 0.40205  | 5.45E-12 |
| AC144831 BIRC5  | -0.38548 | 4.56E-11 |
| AC144833 CDH2   | 0.355925 | 1.52E-09 |
| AC226118 EGF    | 0.539441 | ≤0.0001  |
| ACTA2-AS EGF    | 0.61527  | ≤0.0001  |
| ACTA2-AS BIRC5  | -0.45433 | 2.89E-15 |
| ACTA2-AS CXCL12 | 0.355185 | 1.65E-09 |
| ACVR2B-AS EGF   | 0.41894  | 5.52E-13 |
| ADAMTS9 ZEB1    | 0.563213 | ≤0.0001  |
| ADAMTS9 TWIST2  | 0.339534 | 9.16E-09 |
| ADAMTS9 TWIST1  | 0.336609 | 1.25E-08 |
| ADAMTS9 FZD4    | 0.324352 | 4.41E-08 |
| ADAMTS9 FGF2    | 0.313758 | 1.26E-07 |
| ADAMTS9 CXCL12  | 0.495848 | ≤0.0001  |
| ADAMTS9 BIRC5   | -0.50514 | ≤0.0001  |

|                 |          |          |
|-----------------|----------|----------|
| ADAMTS9 EGF     | 0.499267 | ≤0.0001  |
| ADAMTS9 ZEB1    | 0.490669 | ≤0.0001  |
| ADAMTS9 FGF2    | 0.410084 | 1.86E-12 |
| ADAMTS9 SNAI1   | -0.30257 | 3.64E-07 |
| ADD3-AS1CXCL12  | 0.715512 | ≤0.0001  |
| ADD3-AS1BIRC5   | -0.52255 | ≤0.0001  |
| ADD3-AS1ZEB1    | 0.50014  | ≤0.0001  |
| ADD3-AS1FGF2    | 0.413035 | 1.25E-12 |
| ADD3-AS1FZD4    | 0.357505 | 1.27E-09 |
| ADD3-AS1TWIST2  | 0.31374  | 1.26E-07 |
| ADIPOQ-1FZD4    | 0.841756 | ≤0.0001  |
| ADIPOQ-1FGF2    | 0.662253 | ≤0.0001  |
| ADIPOQ-1TWIST2  | 0.647185 | ≤0.0001  |
| ADIPOQ-1ZEB1    | 0.623139 | ≤0.0001  |
| ADIPOQ-1TWIST1  | 0.498423 | ≤0.0001  |
| ADIPOQ-1CXCL12  | 0.40617  | 3.15E-12 |
| ADIPOQ-1BIRC5   | -0.32496 | 4.15E-08 |
| ADIRF-AS1CXCL12 | 0.494275 | ≤0.0001  |
| ADIRF-AS1BIRC5  | -0.50318 | ≤0.0001  |
| ADIRF-AS1FGF2   | 0.469666 | 2.22E-16 |
| ADIRF-AS1FZD4   | 0.459101 | 1.33E-15 |
| ADIRF-AS1TWIST2 | 0.389292 | 2.83E-11 |
| ADIRF-AS1ZEB1   | 0.388348 | 3.19E-11 |
| ADIRF-AS1CXCR4  | -0.31773 | 8.54E-08 |
| ADIRF-AS1SNAI1  | -0.31574 | 1.04E-07 |
| ADIRF-AS1HIF1A  | -0.30643 | 2.53E-07 |
| ADPGK-A1CDH2    | 0.329747 | 2.55E-08 |
| AF001548.BIRC5  | -0.33112 | 2.21E-08 |
| AF038458.CDH2   | 0.330803 | 2.29E-08 |
| AF067845.FZD4   | 0.681914 | ≤0.0001  |
| AF067845.FGF2   | 0.589433 | ≤0.0001  |
| AF067845.TWIST2 | 0.674591 | ≤0.0001  |
| AF067845.ZEB1   | 0.620523 | ≤0.0001  |
| AF067845.TWIST1 | 0.572015 | ≤0.0001  |
| AF067845.CXCL12 | 0.450159 | 5.77E-15 |
| AF067845.BIRC5  | -0.3682  | 3.70E-10 |
| AF131215.BIRC5  | -0.39314 | 1.74E-11 |
| AF131215.EGF    | 0.361685 | 7.90E-10 |
| AF131215.CXCL12 | 0.300936 | 4.24E-07 |
| AF230666.CDH2   | 0.300793 | 4.29E-07 |
| AFAP1-AS1BIRC5  | 0.396597 | 1.11E-11 |
| AFAP1-AS1CXCL12 | -0.34786 | 3.73E-09 |
| AFF2-IT1 CDH2   | 0.354456 | 1.79E-09 |
| AGAP11 CXCL12   | 0.645919 | ≤0.0001  |
| AGAP11 BIRC5    | -0.50828 | ≤0.0001  |
| AGAP11 FZD4     | 0.781578 | ≤0.0001  |
| AGAP11 FGF2     | 0.737794 | ≤0.0001  |
| AGAP11 TWIST2   | 0.556099 | ≤0.0001  |
| AGAP11 ZEB1     | 0.728432 | ≤0.0001  |
| AGAP11 TWIST1   | 0.38017  | 8.80E-11 |
| AGAP11 CXCR4    | -0.32554 | 3.91E-08 |
| AGAP2-AS1ZEB1   | -0.39429 | 1.50E-11 |
| AGAP2-AS1FZD4   | -0.31042 | 1.74E-07 |
| AGBL4-IT1CDH2   | 0.353981 | 1.89E-09 |
| AGBL5-IT1CXCL12 | 0.318568 | 7.86E-08 |
| AGBL5-IT1BIRC5  | -0.30482 | 2.95E-07 |
| AIRN CDH2       | 0.313561 | 1.28E-07 |
| AJ011932.TWIST2 | 0.35974  | 9.87E-10 |

|                  |          |          |
|------------------|----------|----------|
| AL589986.CDH2    | 0.30359  | 3.31E-07 |
| ALDH1L1-FZD4     | 0.759784 | ≤0.0001  |
| ALDH1L1-FGF2     | 0.621337 | ≤0.0001  |
| ALDH1L1-TWIST2   | 0.69319  | ≤0.0001  |
| ALDH1L1-ZEB1     | 0.571639 | ≤0.0001  |
| ALDH1L1-TWIST1   | 0.666907 | ≤0.0001  |
| ALDH1L1-CXCL12   | 0.405864 | 3.29E-12 |
| ALDH1L1-BIRC5    | -0.34599 | 4.58E-09 |
| ALG13-AS ZEB1    | 0.344858 | 5.17E-09 |
| ALG1L9P BIRC5    | 0.35487  | 1.71E-09 |
| ALG1L9P FZD4     | -0.34829 | 3.56E-09 |
| ALG1L9P ZEB1     | -0.32854 | 2.88E-08 |
| ALG1L9P TWIST2   | -0.32104 | 6.15E-08 |
| ALKBH3-AZEB1     | 0.326341 | 3.61E-08 |
| ALMS1-IT: CXCL12 | -0.32438 | 4.40E-08 |
| ALOX12-A EGF     | 0.328246 | 2.97E-08 |
| ANKRD62:EGF      | 0.471259 | 2.22E-16 |
| AP000345.CDH2    | 0.354371 | 1.81E-09 |
| AP000345.EGF     | 0.37022  | 2.92E-10 |
| AP000439.CXCL12  | 0.506033 | ≤0.0001  |
| AP000439.BIRC5   | -0.45832 | 1.55E-15 |
| AP000439.EGF     | 0.362156 | 7.48E-10 |
| AP000439.CXCL12  | 0.340741 | 8.06E-09 |
| AP000442.ZEB1    | 0.41587  | 8.44E-13 |
| AP000442.FZD4    | 0.35227  | 2.29E-09 |
| AP000442.FGF2    | 0.310438 | 1.73E-07 |
| AP001057.EGF     | 0.316087 | 1.00E-07 |
| AP001063.BIRC5   | 0.381188 | 7.77E-11 |
| AP001189.CXCL12  | 0.361921 | 7.69E-10 |
| AP001257.ZEB1    | 0.571829 | ≤0.0001  |
| AP001257.FZD4    | 0.468561 | 4.44E-16 |
| AP001257.CXCL12  | 0.41567  | 8.68E-13 |
| AP001257.FGF2    | 0.409476 | 2.02E-12 |
| AP001257.TWIST2  | 0.372249 | 2.29E-10 |
| AP001412.BIRC5   | 0.45113  | 4.88E-15 |
| AP001412.CXCL12  | -0.44171 | 2.04E-14 |
| AP001412.ZEB1    | -0.41647 | 7.77E-13 |
| AP001412.FZD4    | -0.35727 | 1.31E-09 |
| AP001412.FGF2    | -0.33044 | 2.37E-08 |
| AP001429.CDH2    | 0.32416  | 4.50E-08 |
| AP001471.TGFB1   | 0.345447 | 4.85E-09 |
| AP001476.TGFB1   | 0.544954 | ≤0.0001  |
| AP001476.TWIST1  | 0.351956 | 2.37E-09 |
| AP001476.TGFB1   | 0.49562  | ≤0.0001  |
| AP001627.FZD4    | 0.598274 | ≤0.0001  |
| AP001627.FGF2    | 0.479133 | ≤0.0001  |
| AP001627.TWIST2  | 0.561161 | ≤0.0001  |
| AP001627.ZEB1    | 0.596546 | ≤0.0001  |
| AP001627.CXCL12  | 0.461893 | 8.88E-16 |
| AP001627.BIRC5   | -0.4541  | 3.11E-15 |
| AP001627.TWIST1  | 0.361484 | 8.08E-10 |
| AP002856.EGF     | 0.480104 | ≤0.0001  |
| AP003774.CXCR4   | 0.308382 | 2.11E-07 |
| AP004782.CXCL12  | 0.497049 | ≤0.0001  |
| AP004782.FZD4    | 0.781194 | ≤0.0001  |
| AP004782.FGF2    | 0.682774 | ≤0.0001  |
| AP004782.TWIST2  | 0.655191 | ≤0.0001  |
| AP004782.ZEB1    | 0.631297 | ≤0.0001  |

|                 |          |          |
|-----------------|----------|----------|
| AP004782.TWIST1 | 0.500995 | ≤0.0001  |
| AP004782.BIRC5  | -0.41995 | 4.79E-13 |
| APTR TWIST2     | -0.32317 | 4.97E-08 |
| APTR ZEB1       | -0.31396 | 1.23E-07 |
| APTR FZD4       | -0.30158 | 3.99E-07 |
| AQP4-AS1EGF     | 0.348229 | 3.58E-09 |
| ARHGAP3.CXCL12  | -0.36285 | 6.91E-10 |
| ARHGAP3.BIRC5   | 0.301065 | 4.19E-07 |
| ARHGAP5.EGF     | 0.402109 | 5.41E-12 |
| ARHGAP5.BIRC5   | -0.36823 | 3.69E-10 |
| ARHGEF2.CXCL12  | -0.36346 | 6.44E-10 |
| ARHGEF2.TWIST2  | -0.32426 | 4.45E-08 |
| ARHGEF2.FGF2    | -0.30735 | 2.32E-07 |
| ARHGEF2.FZD4    | -0.30501 | 2.90E-07 |
| ARHGEF7-ZEB1    | 0.554278 | ≤0.0001  |
| ARHGEF7-FZD4    | 0.36441  | 5.77E-10 |
| ARHGEF7-FGF2    | 0.305141 | 2.86E-07 |
| ARHGEF7-CXCL12  | 0.54544  | ≤0.0001  |
| ARHGEF7-FZD4    | 0.837339 | ≤0.0001  |
| ARHGEF7-FGF2    | 0.70673  | ≤0.0001  |
| ARHGEF7-TWIST2  | 0.786522 | ≤0.0001  |
| ARHGEF7-ZEB1    | 0.724198 | ≤0.0001  |
| ARHGEF7-TWIST1  | 0.658122 | ≤0.0001  |
| ARHGEF7-BIRC5   | -0.43188 | 8.73E-14 |
| ARHGEF7-ZEB1    | 0.351722 | 2.44E-09 |
| ARHGEF7-CDH2    | 0.349449 | 3.13E-09 |
| ARMC2-A-ZEB1    | 0.400822 | 6.41E-12 |
| ARMC2-A-BIRC5   | -0.30509 | 2.88E-07 |
| ARMCX3-CDH2     | 0.309083 | 1.97E-07 |
| ARPP21-ACDH2    | 0.322277 | 5.44E-08 |
| ARRDC1-TGFB1    | 0.352104 | 2.33E-09 |
| ARRDC1-ZEB1     | -0.34479 | 5.21E-09 |
| ARRDC1-FGF2     | -0.31956 | 7.13E-08 |
| ASB16-AS FZD4   | -0.33297 | 1.83E-08 |
| ASB16-AS TWIST2 | -0.31836 | 8.02E-08 |
| ASH1L-AS FZD4   | -0.41329 | 1.20E-12 |
| ASH1L-AS ZEB1   | -0.38141 | 7.56E-11 |
| ASH1L-AS CXCL12 | -0.37211 | 2.33E-10 |
| ASH1L-AS BIRC5  | 0.371642 | 2.46E-10 |
| ASH1L-AS FGF2   | -0.33353 | 1.72E-08 |
| ASH1L-AS TWIST2 | -0.31567 | 1.04E-07 |
| ASTN2-AS CDH2   | 0.323587 | 4.77E-08 |
| ATP13A5- CXCL12 | -0.31825 | 8.11E-08 |
| ATP1A1-A EGF    | 0.427018 | 1.76E-13 |
| ATP1A1-ABIRC5   | -0.31664 | 9.50E-08 |
| ATP1B3-A ZEB1   | 0.415966 | 8.33E-13 |
| ATP2A1-ACXCL12  | -0.47487 | ≤0.0001  |
| ATP2A1-ABIRC5   | 0.528179 | ≤0.0001  |
| ATP2A1-A ZEB1   | -0.43977 | 2.73E-14 |
| ATP2A1-A FGF2   | -0.40301 | 4.80E-12 |
| ATP2A1-A FZD4   | -0.36728 | 4.13E-10 |
| ATP2A1-ATWIST2  | -0.3227  | 5.21E-08 |
| ATP2B2-ITCDH2   | 0.336657 | 1.24E-08 |
| B3GALT5- EGF    | 0.507451 | ≤0.0001  |
| B4GALT1- CXCL12 | 0.510187 | ≤0.0001  |
| B4GALT1- FZD4   | 0.829466 | ≤0.0001  |
| B4GALT1- FGF2   | 0.638487 | ≤0.0001  |
| B4GALT1- TWIST2 | 0.73524  | ≤0.0001  |



|                  |          |          |
|------------------|----------|----------|
| B4GALT1-ZEB1     | 0.619473 | ≤0.0001  |
| B4GALT1-TWIST1   | 0.412679 | 1.31E-12 |
| B4GALT1-BIRC5    | -0.38338 | 5.93E-11 |
| BAALC-ASTGFB1    | 0.32172  | 5.75E-08 |
| BACE1-ASTGFB1    | -0.31176 | 1.53E-07 |
| BCDIN3D-CXCL12   | 0.499633 | ≤0.0001  |
| BCDIN3D-ZEB1     | 0.491767 | ≤0.0001  |
| BCDIN3D-BIRC5    | -0.44827 | 7.55E-15 |
| BCDIN3D-FGF2     | 0.422999 | 3.12E-13 |
| BCDIN3D-FZD4     | 0.398692 | 8.47E-12 |
| BCDIN3D-SNAI1    | -0.34375 | 5.83E-09 |
| BCDIN3D-EGF      | 0.319085 | 7.47E-08 |
| BDNF-AS BIRC5    | -0.48937 | ≤0.0001  |
| BDNF-AS EGF      | 0.514913 | ≤0.0001  |
| BDNF-AS CXCL12   | 0.464156 | 6.66E-16 |
| BDNF-AS SNAI1    | -0.39436 | 1.48E-11 |
| BDNF-AS FGF2     | 0.357749 | 1.24E-09 |
| BDNF-AS TGFB1    | -0.32333 | 4.89E-08 |
| BDNF-AS HIF1A    | -0.31286 | 1.37E-07 |
| BEAN1-ASBIRC5    | -0.37687 | 1.32E-10 |
| BEAN1-ASZEB1     | 0.346245 | 4.45E-09 |
| BLACAT1 CXCL12   | -0.33607 | 1.32E-08 |
| BLACAT1 FZD4     | -0.30431 | 3.10E-07 |
| BMS1P14 FZD4     | 0.497784 | ≤0.0001  |
| BMS1P14 TWIST2   | 0.387742 | 3.44E-11 |
| BMS1P14 ZEB1     | 0.348981 | 3.30E-09 |
| BMS1P14 FGF2     | 0.338677 | 1.00E-08 |
| BMS1P4 ZEB1      | 0.306827 | 2.44E-07 |
| BOK-AS1 FZD4     | 0.325834 | 3.80E-08 |
| BRWD1-A CXCL12   | -0.34774 | 3.78E-09 |
| BVES-AS1 CDH2    | 0.321368 | 5.95E-08 |
| C10orf111 FZD4   | -0.33445 | 1.57E-08 |
| C10orf111 TWIST2 | -0.32774 | 3.13E-08 |
| C10orf95 ZEB1    | -0.39634 | 1.15E-11 |
| C10orf95 FGF2    | -0.38051 | 8.44E-11 |
| C10orf95 FZD4    | -0.37626 | 1.42E-10 |
| C10orf95 CXCL12  | -0.3592  | 1.05E-09 |
| C10orf95 BIRC5   | 0.339782 | 8.92E-09 |
| C10orf95 TWIST2  | -0.33724 | 1.17E-08 |
| C14orf132 CXCL12 | 0.447025 | 9.10E-15 |
| C14orf132 BIRC5  | -0.43498 | 5.55E-14 |
| C14orf132 SNAI1  | -0.31547 | 1.06E-07 |
| C14orf132 EGF    | 0.307749 | 2.24E-07 |
| C17orf100 FZD4   | -0.35389 | 1.91E-09 |
| C17orf100 ZEB1   | -0.34907 | 3.26E-09 |
| C17orf100 EGF    | 0.302457 | 3.68E-07 |
| C17orf82 TGFB1   | 0.623815 | ≤0.0001  |
| C1orf140 ZEB1    | 0.431719 | 8.93E-14 |
| C1QTNF9-CXCL12   | 0.397922 | 9.36E-12 |
| C1QTNF9-BIRC5    | -0.33493 | 1.49E-08 |
| C1QTNF9-FGF2     | 0.304604 | 3.01E-07 |
| C20orf203 EGF    | 0.519915 | ≤0.0001  |
| C20orf203 BIRC5  | -0.40372 | 4.37E-12 |
| C20orf203 CXCL12 | 0.315414 | 1.07E-07 |
| C21orf62-BIRC5   | -0.48726 | ≤0.0001  |
| C21orf62-CXCL12  | 0.40146  | 5.89E-12 |
| C21orf62-EGF     | 0.362944 | 6.83E-10 |
| C21orf62-ZEB1    | 0.315961 | 1.02E-07 |

|           |        |          |          |
|-----------|--------|----------|----------|
| C2orf48   | BIRC5  | 0.499787 | ≤0.0001  |
| C2orf48   | CXCL12 | -0.4513  | 4.66E-15 |
| C2orf48   | FGF2   | -0.37554 | 1.54E-10 |
| C2orf48   | FZD4   | -0.35242 | 2.25E-09 |
| C2orf48   | ZEB1   | -0.32596 | 3.75E-08 |
| C2orf48   | TWIST2 | -0.31622 | 9.90E-08 |
| C3orf67-A | CDH2   | 0.303317 | 3.40E-07 |
| C5orf64   | CXCL12 | 0.524355 | ≤0.0001  |
| C5orf64   | FZD4   | 0.678241 | ≤0.0001  |
| C5orf64   | FGF2   | 0.542392 | ≤0.0001  |
| C5orf64   | TWIST2 | 0.580051 | ≤0.0001  |
| C5orf64   | ZEB1   | 0.532415 | ≤0.0001  |
| C5orf64   | BIRC5  | -0.44134 | 2.15E-14 |
| C6orf99   | CXCL12 | -0.43383 | 6.57E-14 |
| C6orf99   | FGF2   | -0.38798 | 3.34E-11 |
| C6orf99   | ZEB1   | -0.38096 | 7.99E-11 |
| C6orf99   | TWIST2 | -0.37558 | 1.54E-10 |
| C6orf99   | BIRC5  | 0.358515 | 1.14E-09 |
| C6orf99   | FZD4   | -0.35322 | 2.06E-09 |
| C6orf99   | HIF1A  | 0.340425 | 8.33E-09 |
| C6orf99   | TWIST1 | -0.30996 | 1.81E-07 |
| C7orf69   | ZEB1   | 0.452449 | 4.00E-15 |
| C7orf69   | FZD4   | 0.305832 | 2.68E-07 |
| C9orf139  | TGFB1  | 0.446139 | 1.04E-14 |
| C9orf163  | BIRC5  | 0.422002 | 3.59E-13 |
| C9orf163  | ZEB1   | -0.41511 | 9.38E-13 |
| C9orf163  | TWIST2 | -0.39176 | 2.07E-11 |
| C9orf163  | FZD4   | -0.38408 | 5.44E-11 |
| C9orf163  | CXCL12 | -0.37897 | 1.02E-10 |
| C9orf163  | FGF2   | -0.36101 | 8.54E-10 |
| C9orf170  | CDH2   | 0.363023 | 6.77E-10 |
| CACNA1C   | CDH2   | 0.336408 | 1.28E-08 |
| CACNA1C   | CDH2   | 0.322611 | 5.26E-08 |
| CACNA2D   | CDH2   | 0.353992 | 1.89E-09 |
| CACTIN-A  | TGFB1  | 0.309546 | 1.89E-07 |
| CADM2-A   | CDH2   | 0.360465 | 9.09E-10 |
| CADM2-A   | ZEB1   | 0.313589 | 1.28E-07 |
| CADM2-A   | CDH2   | 0.352945 | 2.13E-09 |
| CADM3-A   | CXCL12 | 0.831921 | ≤0.0001  |
| CADM3-A   | BIRC5  | -0.61939 | ≤0.0001  |
| CADM3-A   | FZD4   | 0.664822 | ≤0.0001  |
| CADM3-A   | FGF2   | 0.650977 | ≤0.0001  |
| CADM3-A   | TWIST2 | 0.537913 | ≤0.0001  |
| CADM3-A   | ZEB1   | 0.667016 | ≤0.0001  |
| CADM3-A   | TWIST1 | 0.351247 | 2.57E-09 |
| CARD8-A   | ZEB1   | 0.32049  | 6.50E-08 |
| CARD8-A   | CXCL12 | 0.306807 | 2.45E-07 |
| CASC15    | CDH2   | 0.387163 | 3.70E-11 |
| CASC19    | CDH2   | 0.326068 | 3.71E-08 |
| CASC2     | TGFB1  | -0.30302 | 3.49E-07 |
| CASC22    | TWIST1 | 0.470405 | 2.22E-16 |
| CCDC144A  | CDH2   | 0.353434 | 2.01E-09 |
| CCDC39-A  | ZEB1   | 0.388636 | 3.07E-11 |
| CCDC39-A  | FGF2   | 0.368488 | 3.58E-10 |
| CCDC39-A  | CXCL12 | 0.34834  | 3.54E-09 |
| CCDC39-A  | BIRC5  | -0.32674 | 3.47E-08 |
| CCDC39-A  | FZD4   | 0.308969 | 1.99E-07 |
| CCND2-A   | ZEB1   | 0.528298 | ≤0.0001  |

|                 |          |          |
|-----------------|----------|----------|
| CCND2-A:BIRC5   | -0.39526 | 1.32E-11 |
| CCND2-A: CXCL12 | 0.333535 | 1.72E-08 |
| CCNT2-A:EGF     | 0.330486 | 2.36E-08 |
| CD27-AS1 ZEB1   | -0.33684 | 1.22E-08 |
| CD27-AS1 CDH2   | 0.313852 | 1.25E-07 |
| CDKN2B-/CXCL12  | -0.36989 | 3.03E-10 |
| CDKN2B-/BIRC5   | 0.337337 | 1.16E-08 |
| CEBPB-AS CXCL12 | 0.488005 | ≤0.0001  |
| CEBPB-AS BIRC5  | -0.50081 | ≤0.0001  |
| CEBPB-AS ZEB1   | 0.434808 | 5.68E-14 |
| CEBPB-AS FGF2   | 0.364057 | 6.01E-10 |
| CEBPB-AS FZD4   | 0.329576 | 2.60E-08 |
| CEBPB-AS CXCR4  | -0.31828 | 8.08E-08 |
| CECR3 CDH2      | 0.321682 | 5.77E-08 |
| CECR7 CDH2      | 0.320606 | 6.42E-08 |
| CELF2-AS: ZEB1  | 0.374522 | 1.75E-10 |
| CELF2-AS: ZEB1  | 0.301934 | 3.86E-07 |
| CERS3-AS ZEB1   | 0.3989   | 8.24E-12 |
| CERS3-AS CXCL12 | 0.317352 | 8.86E-08 |
| CERS3-AS BIRC5  | -0.30772 | 2.24E-07 |
| CH17-340 TGFB1  | 0.304746 | 2.97E-07 |
| CHL1-AS1 CXCL12 | 0.60361  | ≤0.0001  |
| CHL1-AS1 BIRC5  | -0.50611 | ≤0.0001  |
| CHL1-AS1 FZD4   | 0.513294 | ≤0.0001  |
| CHL1-AS1 FGF2   | 0.540609 | ≤0.0001  |
| CHL1-AS1 ZEB1   | 0.592219 | ≤0.0001  |
| CHL1-AS1 TWIST2 | 0.402261 | 5.30E-12 |
| CHL1-AS2 CXCL12 | 0.663309 | ≤0.0001  |
| CHL1-AS2 BIRC5  | -0.53411 | ≤0.0001  |
| CHL1-AS2 TWIST2 | 0.45194  | 4.22E-15 |
| CHL1-AS2 FGF2   | 0.419306 | 5.24E-13 |
| CHL1-AS2 FZD4   | 0.395    | 1.37E-11 |
| CHL1-AS2 TWIST1 | 0.358325 | 1.16E-09 |
| CHL1-AS2 ZEB1   | 0.332602 | 1.90E-08 |
| CHL1-AS2 HIF1A  | -0.3119  | 1.50E-07 |
| CHRM3-A CDH2    | 0.370689 | 2.76E-10 |
| CIRBP-AS: FGF2  | -0.30479 | 2.96E-07 |
| CKMT2-A: CXCL12 | 0.500657 | ≤0.0001  |
| CKMT2-A: BIRC5  | -0.55329 | ≤0.0001  |
| CKMT2-A: EGF    | 0.566567 | ≤0.0001  |
| CKMT2-A: FGF2   | 0.335559 | 1.39E-08 |
| CKMT2-A: SNAI1  | -0.33412 | 1.62E-08 |
| CKMT2-A: ZEB1   | 0.324515 | 4.34E-08 |
| CLSTN2-A ZEB1   | 0.309916 | 1.82E-07 |
| CNTFR-AS FZD4   | 0.697563 | ≤0.0001  |
| CNTFR-AS FGF2   | 0.5702   | ≤0.0001  |
| CNTFR-AS TWIST2 | 0.527498 | ≤0.0001  |
| CNTFR-AS ZEB1   | 0.637874 | ≤0.0001  |
| CNTFR-AS CXCL12 | 0.37681  | 1.33E-10 |
| CNTFR-AS TWIST1 | 0.373165 | 2.06E-10 |
| CNTFR-AS BIRC5  | -0.31756 | 8.68E-08 |
| CNTN4-A: ZEB1   | 0.317257 | 8.94E-08 |
| CNTN4-A: CDH2   | 0.351006 | 2.64E-09 |
| COL4A2-A ZEB1   | 0.532864 | ≤0.0001  |
| COL4A2-A FZD4   | 0.347882 | 3.72E-09 |
| COL4A2-A TWIST2 | 0.327918 | 3.07E-08 |
| COL4A2-A TWIST1 | 0.314175 | 1.21E-07 |
| COL4A2-A ZEB1   | 0.338042 | 1.07E-08 |

|                  |          |          |
|------------------|----------|----------|
| COX10-AS EGF     | 0.339864 | 8.85E-09 |
| COX10-AS SNAI1   | -0.32003 | 6.80E-08 |
| CPB2-AS1 EGF     | 0.40814  | 2.42E-12 |
| CPB2-AS1 SNAI1   | -0.30203 | 3.83E-07 |
| CPEB1-AS ZEB1    | 0.410212 | 1.83E-12 |
| CRNDE EGF        | 0.31997  | 6.84E-08 |
| CSPG4P1Y PDGFB   | 0.443921 | 1.47E-14 |
| CTBP1-AS ZEB1    | 0.305238 | 2.84E-07 |
| CTD-2201 CDH2    | 0.344439 | 5.41E-09 |
| CTD-2270 EGF     | 0.51211  | ≤0.0001  |
| CTD-2270 BIRC5   | -0.40152 | 5.85E-12 |
| CTD-2270 CXCL12  | 0.345312 | 4.92E-09 |
| CTD-2270 SNAI1   | -0.3126  | 1.41E-07 |
| CTD-3080 TWIST2  | 0.339145 | 9.55E-09 |
| CTD-3080 FZD4    | 0.331543 | 2.12E-08 |
| CTD-3080 CXCL12  | 0.322495 | 5.32E-08 |
| CYB561D2 TGFB1   | 0.313192 | 1.33E-07 |
| CYP4F26P CDH2    | 0.307964 | 2.19E-07 |
| CYYR1-AS HIF1A   | 0.41435  | 1.04E-12 |
| DAB1-AS1 CDH2    | 0.338988 | 9.71E-09 |
| DANCR ZEB1       | -0.47909 | ≤0.0001  |
| DANCR BIRC5      | 0.439599 | 2.80E-14 |
| DANCR FZD4       | -0.40778 | 2.54E-12 |
| DANCR CXCL12     | -0.40538 | 3.51E-12 |
| DANCR FGF2       | -0.38005 | 8.93E-11 |
| DANCR TWIST2     | -0.3464  | 4.38E-09 |
| DARS-AS1 FZD4    | -0.32889 | 2.78E-08 |
| DARS-AS1 TWIST2  | -0.32112 | 6.10E-08 |
| DARS-AS1 FGF2    | -0.31277 | 1.38E-07 |
| DDC-AS1 HIF1A    | 0.302135 | 3.79E-07 |
| DDX11-AS CXCL12  | -0.5077  | ≤0.0001  |
| DDX11-AS BIRC5   | 0.500541 | ≤0.0001  |
| DDX11-AS FZD4    | -0.40485 | 3.76E-12 |
| DDX11-AS CDH2    | 0.391836 | 2.05E-11 |
| DDX11-AS FGF2    | -0.38743 | 3.58E-11 |
| DDX11-AS TWIST2  | -0.37097 | 2.67E-10 |
| DDX11-AS ZEB1    | -0.37043 | 2.85E-10 |
| DEPDC1-AS BIRC5  | 0.491024 | ≤0.0001  |
| DEPDC1-AS CXCL12 | -0.43036 | 1.09E-13 |
| DEPDC1-AS FGF2   | -0.34045 | 8.31E-09 |
| DEPDC1-AS FZD4   | -0.32005 | 6.79E-08 |
| DEPDC1-AS ZEB1   | -0.31539 | 1.07E-07 |
| DGCR5 BIRC5      | 0.405187 | 3.60E-12 |
| DGCR5 CXCL12     | -0.39284 | 1.80E-11 |
| DGCR5 ZEB1       | -0.34926 | 3.20E-09 |
| DGCR5 FZD4       | -0.34353 | 5.97E-09 |
| DGCR5 FGF2       | -0.32557 | 3.90E-08 |
| DGCR9 CXCL12     | -0.35307 | 2.10E-09 |
| DGCR9 BIRC5      | 0.329059 | 2.74E-08 |
| DGCR9 FGF2       | -0.32    | 6.82E-08 |
| DGCR9 FZD4       | -0.31632 | 9.80E-08 |
| DGUOK-AS ZEB1    | -0.3683  | 3.66E-10 |
| DGUOK-AS CXCL12  | -0.34917 | 3.23E-09 |
| DGUOK-AS FZD4    | -0.3129  | 1.37E-07 |
| DGUOK-AS FGF2    | -0.30248 | 3.67E-07 |
| DHRS4-AS TGFB1   | -0.31848 | 7.93E-08 |
| DICER1-AS EGF    | 0.315091 | 1.11E-07 |
| DIO3OS FZD4      | 0.537576 | ≤0.0001  |

|           |        |          |          |
|-----------|--------|----------|----------|
| DIO3OS    | TWIST2 | 0.545315 | ≤0.0001  |
| DIO3OS    | TWIST1 | 0.553686 | ≤0.0001  |
| DIO3OS    | CXCL12 | 0.451924 | 4.22E-15 |
| DIO3OS    | ZEB1   | 0.45029  | 5.55E-15 |
| DIO3OS    | FGF2   | 0.414354 | 1.04E-12 |
| DIO3OS    | BIRC5  | -0.37995 | 9.05E-11 |
| DKFZP434  | CDH2   | 0.322284 | 5.43E-08 |
| DKFZp779  | FZD4   | 0.436359 | 4.53E-14 |
| DKFZp779  | TWIST2 | 0.41765  | 6.60E-13 |
| DLEU2     | BIRC5  | 0.350015 | 2.94E-09 |
| DLEU2     | CXCL12 | -0.32781 | 3.11E-08 |
| DLEU2     | CDH2   | 0.300768 | 4.30E-07 |
| DLEU2L    | ZEB1   | 0.356941 | 1.36E-09 |
| DLEU7-AS  | TGFB1  | 0.372766 | 2.16E-10 |
| DLG5-AS1  | ZEB1   | -0.30191 | 3.87E-07 |
| DLGAP1-A  | CDH2   | 0.372281 | 2.28E-10 |
| DLGAP1-A  | CDH2   | 0.342613 | 6.59E-09 |
| DLGAP2-A  | CDH2   | 0.367968 | 3.81E-10 |
| DLX6-AS1  | CDH2   | 0.321007 | 6.17E-08 |
| DLX6-AS1  | CXCL12 | -0.30726 | 2.34E-07 |
| DNM3-IT1  | CDH2   | 0.319592 | 7.10E-08 |
| DNMBP-A   | EGF    | 0.44112  | 2.22E-14 |
| DNMBP-A   | BIRC5  | -0.37449 | 1.75E-10 |
| DNMBP-A   | SNAI1  | -0.34415 | 5.58E-09 |
| DOCK4-A   | CDH2   | 0.331929 | 2.04E-08 |
| DPP10-AS  | CDH2   | 0.352292 | 2.29E-09 |
| DPP10-AS  | CDH2   | 0.353652 | 1.96E-09 |
| DSCAM-IT  | CDH2   | 0.34271  | 6.52E-09 |
| DSCR9     | CXCL12 | -0.32655 | 3.54E-08 |
| DUXAP8    | CXCL12 | -0.31859 | 7.84E-08 |
| EFCAB14-  | ZEB1   | 0.304866 | 2.94E-07 |
| EGFR-AS1  | CDH2   | 0.353123 | 2.08E-09 |
| EHD4-AS1  | ZEB1   | 0.316044 | 1.01E-07 |
| EIF1B-AS1 | CXCL12 | 0.615106 | ≤0.0001  |
| EIF1B-AS1 | BIRC5  | -0.59709 | ≤0.0001  |
| EIF1B-AS1 | FZD4   | 0.577477 | ≤0.0001  |
| EIF1B-AS1 | FGF2   | 0.572355 | ≤0.0001  |
| EIF1B-AS1 | TWIST2 | 0.482689 | ≤0.0001  |
| EIF1B-AS1 | ZEB1   | 0.657997 | ≤0.0001  |
| EIF1B-AS1 | TWIST1 | 0.358852 | 1.09E-09 |
| EIF1B-AS1 | CXCR4  | -0.32696 | 3.39E-08 |
| EIF1B-AS1 | SNAI1  | -0.32088 | 6.25E-08 |
| EIF1B-AS1 | EGF    | 0.310048 | 1.80E-07 |
| ELMO1-A   | CDH2   | 0.34901  | 3.29E-09 |
| ELOVL2-A  | EGF    | 0.349306 | 3.18E-09 |
| ELOVL2-A  | BIRC5  | -0.34201 | 7.03E-09 |
| EMX2OS    | CXCL12 | 0.632485 | ≤0.0001  |
| EMX2OS    | FZD4   | 0.748872 | ≤0.0001  |
| EMX2OS    | FGF2   | 0.660917 | ≤0.0001  |
| EMX2OS    | TWIST2 | 0.707343 | ≤0.0001  |
| EMX2OS    | ZEB1   | 0.859927 | ≤0.0001  |
| EMX2OS    | TWIST1 | 0.506585 | ≤0.0001  |
| EMX2OS    | BIRC5  | -0.46574 | 4.44E-16 |
| ENOX1-A   | CDH2   | 0.305476 | 2.77E-07 |
| ENOX1-A   | CDH2   | 0.353979 | 1.89E-09 |
| ENTPD3-A  | CXCL12 | 0.45423  | 3.11E-15 |
| ENTPD3-A  | BIRC5  | -0.4475  | 8.44E-15 |
| ENTPD3-A  | FGF2   | 0.385515 | 4.55E-11 |

|                 |          |          |
|-----------------|----------|----------|
| ENTPD3-A TWIST2 | 0.37444  | 1.76E-10 |
| ENTPD3-A FZD4   | 0.371657 | 2.46E-10 |
| ENTPD3-A HIF1A  | -0.3352  | 1.45E-08 |
| ENTPD3-A ZEB1   | 0.332026 | 2.02E-08 |
| ENTPD3-A CXCR4  | -0.32    | 6.82E-08 |
| EPB41L4A-EGF    | 0.542829 | ≤0.0001  |
| EPB41L4A-CXCL12 | 0.424356 | 2.57E-13 |
| EPB41L4A-BIRC5  | -0.39854 | 8.64E-12 |
| EPB41L4A-HIF1A  | -0.39401 | 1.55E-11 |
| EPHA1-AS HIF1A  | 0.332178 | 1.98E-08 |
| EPHA5-AS TWIST1 | 0.303205 | 3.43E-07 |
| EPN2-AS1 CDH2   | 0.33877  | 9.94E-09 |
| ERC2-IT1 CDH2   | 0.321303 | 5.99E-08 |
| ERICH6-A'CDH2   | 0.330938 | 2.26E-08 |
| ERVH48-1 PDGFB  | 0.435221 | 5.35E-14 |
| ETV5-AS1 CDH2   | 0.327647 | 3.16E-08 |
| ETV5-AS1 ZEB1   | 0.30529  | 2.82E-07 |
| EWSAT1 EGF      | 0.387    | 3.78E-11 |
| EWSAT1 BIRC5    | -0.35226 | 2.29E-09 |
| EXTL3-AS'EGF    | 0.318032 | 8.29E-08 |
| FAM138B CXCL12  | 0.341248 | 7.63E-09 |
| FAM13A-/BIRC5   | -0.45616 | 2.22E-15 |
| FAM13A-/CXCL12  | 0.379129 | 1.00E-10 |
| FAM13A-/ZEB1    | 0.374904 | 1.67E-10 |
| FAM13A-/EGF     | 0.330359 | 2.39E-08 |
| FAM155A-CDH2    | 0.337833 | 1.10E-08 |
| FAM157A HIF1A   | 0.340077 | 8.65E-09 |
| FAM170B-ZEB1    | 0.347092 | 4.06E-09 |
| FAM201A ZEB1    | -0.32398 | 4.58E-08 |
| FAM201A FZD4    | -0.31495 | 1.12E-07 |
| FAM222A-FZD4    | 0.488984 | ≤0.0001  |
| FAM222A-FGF2    | 0.530674 | ≤0.0001  |
| FAM222A-TWIST2  | 0.438552 | 3.26E-14 |
| FAM222A-ZEB1    | 0.372756 | 2.16E-10 |
| FAM222A-TWIST1  | 0.32715  | 3.33E-08 |
| FAM225A TGFB1   | 0.539794 | ≤0.0001  |
| FAM225B TGFB1   | 0.529201 | ≤0.0001  |
| FAM41C EGF      | 0.34279  | 6.47E-09 |
| FAM66B EGF      | 0.449761 | 6.00E-15 |
| FAM66B BIRC5    | -0.43213 | 8.39E-14 |
| FAM66B SNAI1    | -0.36124 | 8.32E-10 |
| FAM66B CXCL12   | 0.358757 | 1.10E-09 |
| FAM66B ZEB1     | 0.314995 | 1.12E-07 |
| FAM66C CDH2     | 0.44326  | 1.60E-14 |
| FAM66D EGF      | 0.413489 | 1.17E-12 |
| FAM66D CXCL12   | 0.323088 | 5.01E-08 |
| FAM83C-/CXCL12  | -0.42681 | 1.81E-13 |
| FAM83C-/BIRC5   | 0.406456 | 3.04E-12 |
| FAM83C-/ZEB1    | -0.36552 | 5.07E-10 |
| FAM83C-/FZD4    | -0.33706 | 1.19E-08 |
| FAM83C-/FGF2    | -0.32307 | 5.02E-08 |
| FAM87A CDH2     | 0.34906  | 3.27E-09 |
| FAM87B ZEB1     | 0.576436 | ≤0.0001  |
| FAM87B FZD4     | 0.333843 | 1.67E-08 |
| FAM87B TWIST2   | 0.323662 | 4.73E-08 |
| FEZF1-AS1CDH2   | 0.473545 | ≤0.0001  |
| FGD5-AS1 FGF2   | 0.515658 | ≤0.0001  |
| FGD5-AS1 ZEB1   | 0.517119 | ≤0.0001  |

|                 |          |          |
|-----------------|----------|----------|
| FGD5-AS1 FZD4   | 0.465601 | 4.44E-16 |
| FGD5-AS1 CXCL12 | 0.444758 | 1.29E-14 |
| FGD5-AS1 TWIST2 | 0.33848  | 1.02E-08 |
| FGF10-AS CXCL12 | 0.640599 | ≤0.0001  |
| FGF10-AS BIRC5  | -0.53953 | ≤0.0001  |
| FGF10-AS FZD4   | 0.525804 | ≤0.0001  |
| FGF10-AS FGF2   | 0.558526 | ≤0.0001  |
| FGF10-AS TWIST2 | 0.56308  | ≤0.0001  |
| FGF10-AS ZEB1   | 0.660696 | ≤0.0001  |
| FGF10-AS TWIST1 | 0.498779 | ≤0.0001  |
| FGF10-AS EGF    | 0.330918 | 2.26E-08 |
| FGF12-AS CDH2   | 0.31252  | 1.42E-07 |
| FGF12-AS FZD4   | 0.555139 | ≤0.0001  |
| FGF12-AS ZEB1   | 0.465332 | 4.44E-16 |
| FGF12-AS FGF2   | 0.46162  | 8.88E-16 |
| FGF12-AS TWIST2 | 0.374378 | 1.78E-10 |
| FGF12-AS CXCL12 | 0.326319 | 3.62E-08 |
| FGF12-AS TWIST1 | 0.302976 | 3.51E-07 |
| FGF13-AS CXCL12 | 0.525769 | ≤0.0001  |
| FGF13-AS FZD4   | 0.714563 | ≤0.0001  |
| FGF13-AS FGF2   | 0.633872 | ≤0.0001  |
| FGF13-AS TWIST2 | 0.573459 | ≤0.0001  |
| FGF13-AS ZEB1   | 0.65103  | ≤0.0001  |
| FGF13-AS BIRC5  | -0.47019 | 2.22E-16 |
| FGF13-AS TWIST1 | 0.309238 | 1.94E-07 |
| FGF13-AS CXCR4  | -0.30307 | 3.48E-07 |
| FGF14-AS CDH2   | 0.357727 | 1.24E-09 |
| FGF14-AS CXCL12 | 0.584969 | ≤0.0001  |
| FGF14-AS FZD4   | 0.740692 | ≤0.0001  |
| FGF14-AS FGF2   | 0.617512 | ≤0.0001  |
| FGF14-AS TWIST2 | 0.691528 | ≤0.0001  |
| FGF14-AS ZEB1   | 0.582491 | ≤0.0001  |
| FGF14-AS BIRC5  | -0.44977 | 6.00E-15 |
| FGF14-AS TWIST1 | 0.42721  | 1.71E-13 |
| FGF14-AS HIF1A  | -0.35619 | 1.48E-09 |
| FGF14-AS CXCR4  | -0.35019 | 2.89E-09 |
| FGF14-IT1 CDH2  | 0.356396 | 1.44E-09 |
| FLG-AS1 ZEB1    | 0.422354 | 3.42E-13 |
| FLG-AS1 CDH2    | 0.312904 | 1.37E-07 |
| FLJ20021 TWIST1 | 0.482404 | ≤0.0001  |
| FLJ20021 TWIST2 | 0.386596 | 3.97E-11 |
| FLJ22447 TGFB1  | 0.3349   | 1.49E-08 |
| FLJ30679 CXCL12 | -0.3117  | 1.53E-07 |
| FLJ31104 CXCL12 | 0.376422 | 1.39E-10 |
| FLJ31104 BIRC5  | -0.345   | 5.09E-09 |
| FLJ31104 EGF    | 0.344054 | 5.64E-09 |
| FLJ37035 EGF    | 0.459551 | 1.33E-15 |
| FLJ37035 BIRC5  | -0.35606 | 1.50E-09 |
| FLJ46284 BIRC5  | -0.36434 | 5.81E-10 |
| FOXC2-AS TGFB1  | 0.302854 | 3.55E-07 |
| FOXD2-AS BIRC5  | 0.36508  | 5.33E-10 |
| FOXD2-AS CXCL12 | -0.35014 | 2.90E-09 |
| FOXD3-AS BIRC5  | 0.472811 | ≤0.0001  |
| FOXD3-AS CXCL12 | -0.39525 | 1.32E-11 |
| FOXD3-AS ZEB1   | -0.34419 | 5.56E-09 |
| FOXD3-AS FZD4   | -0.30613 | 2.61E-07 |
| FOXG1-AS CDH2   | 0.360938 | 8.61E-10 |
| FREM2-AS CDH2   | 0.332286 | 1.96E-08 |

|                 |          |          |
|-----------------|----------|----------|
| FRMPD3-/CDH2    | 0.32277  | 5.18E-08 |
| FRMPD4-/CDH2    | 0.348129 | 3.62E-09 |
| FTX ZEB1        | 0.351048 | 2.62E-09 |
| GABRG3-/CDH2    | 0.355038 | 1.68E-09 |
| GACAT2 SNAI1    | 0.331771 | 2.07E-08 |
| GACAT2 BIRC5    | 0.305687 | 2.72E-07 |
| GAS5 ZEB1       | -0.31425 | 1.20E-07 |
| GAS5 PDGFB      | -0.30145 | 4.04E-07 |
| GAS5-AS1 ZEB1   | 0.420149 | 4.66E-13 |
| GAS5-AS1 BIRC5  | -0.36445 | 5.74E-10 |
| GAS5-AS1 CXCL12 | 0.326134 | 3.69E-08 |
| GAS5-AS1 FGF2   | 0.301188 | 4.14E-07 |
| GATA2-AS1 HIF1A | 0.305508 | 2.77E-07 |
| GDNF-AS1 CDH2   | 0.361846 | 7.75E-10 |
| GHET1 TWIST2    | -0.38235 | 6.73E-11 |
| GHET1 FGF2      | -0.33822 | 1.05E-08 |
| GHET1 FZD4      | -0.33351 | 1.73E-08 |
| GHET1 CXCL12    | -0.31357 | 1.28E-07 |
| GLIDR CXCL12    | 0.331035 | 2.23E-08 |
| GLIDR BIRC5     | -0.33019 | 2.44E-08 |
| GLIDR EGF       | 0.327031 | 3.37E-08 |
| GLIDR SNAI1     | -0.30661 | 2.49E-07 |
| GLYCTK-A ZEB1   | 0.34293  | 6.37E-09 |
| GNG12-A ZEB1    | 0.399923 | 7.21E-12 |
| GNG12-A BIRC5   | -0.3745  | 1.75E-10 |
| GPC6-AS1 CDH2   | 0.305897 | 2.67E-07 |
| GPC6-AS2 CDH2   | 0.311949 | 1.50E-07 |
| GRID1-AS ZEB1   | 0.347761 | 3.77E-09 |
| GRIK1-AS BIRC5  | -0.34482 | 5.19E-09 |
| GRIK1-AS EGF    | 0.31084  | 1.67E-07 |
| GRM7-AS CDH2    | 0.353101 | 2.09E-09 |
| GRPEL2-A ZEB1   | 0.459954 | 1.33E-15 |
| GRPEL2-A FZD4   | 0.369199 | 3.29E-10 |
| GRPEL2-A CXCL12 | 0.339053 | 9.64E-09 |
| GS1-600G CDH2   | 0.354115 | 1.86E-09 |
| GYG2-AS1 ZEB1   | 0.388999 | 2.94E-11 |
| GYG2-AS1 FZD4   | 0.313466 | 1.29E-07 |
| HAND2-A CXCL12  | 0.477976 | ≤0.0001  |
| HAND2-A ZEB1    | 0.634757 | ≤0.0001  |
| HAND2-A FGF2    | 0.422029 | 3.57E-13 |
| HAND2-A FZD4    | 0.384567 | 5.12E-11 |
| HAND2-A TWIST1  | 0.380953 | 8.00E-11 |
| HAND2-A BIRC5   | -0.37963 | 9.40E-11 |
| HAND2-A TWIST2  | 0.368336 | 3.64E-10 |
| HAR1B SNAI1     | 0.324743 | 4.24E-08 |
| HCG11 CXCL12    | 0.423202 | 3.03E-13 |
| HCG11 FGF2      | 0.413246 | 1.21E-12 |
| HCG11 EGF       | 0.36059  | 8.96E-10 |
| HCG11 ZEB1      | 0.34906  | 3.27E-09 |
| HCG11 SNAI1     | -0.34235 | 6.78E-09 |
| HCG11 BIRC5     | -0.33213 | 1.99E-08 |
| HCG11 TGFB1     | -0.31366 | 1.27E-07 |
| HCG14 ZEB1      | 0.376786 | 1.33E-10 |
| HCG14 FZD4      | 0.375712 | 1.51E-10 |
| HCG14 TWIST2    | 0.331018 | 2.24E-08 |
| HCG14 TWIST1    | 0.310809 | 1.67E-07 |
| HCG18 CDH2      | 0.37002  | 2.99E-10 |
| HCG21 TWIST1    | 0.375355 | 1.58E-10 |



|                 |        |          |          |
|-----------------|--------|----------|----------|
| HCG22           | CXCL12 | 0.389638 | 2.71E-11 |
| HCG22           | BIRC5  | -0.30178 | 3.92E-07 |
| HCG24           | CDH2   | 0.452102 | 4.00E-15 |
| HCG9            | ZEB1   | 0.371454 | 2.52E-10 |
| HCP5B           | CXCL12 | 0.36651  | 4.51E-10 |
| HCP5B           | BIRC5  | -0.33596 | 1.34E-08 |
| HDAC11-/CXCL12  |        | -0.30511 | 2.87E-07 |
| HEIH            | CXCL12 | 0.365071 | 5.34E-10 |
| HEIH            | BIRC5  | -0.3297  | 2.56E-08 |
| HEXA-AS1EGF     |        | 0.391467 | 2.15E-11 |
| HEXA-AS1BIRC5   |        | -0.39032 | 2.48E-11 |
| HHIP-AS1 FGF2   |        | 0.329706 | 2.56E-08 |
| HHIP-AS1 TWIST1 |        | 0.31308  | 1.34E-07 |
| HID1-AS1 CXCL12 |        | 0.812266 | ≤0.0001  |
| HID1-AS1 BIRC5  |        | -0.58302 | ≤0.0001  |
| HID1-AS1 FZD4   |        | 0.815532 | ≤0.0001  |
| HID1-AS1 FGF2   |        | 0.734973 | ≤0.0001  |
| HID1-AS1 TWIST2 |        | 0.682859 | ≤0.0001  |
| HID1-AS1 ZEB1   |        | 0.768743 | ≤0.0001  |
| HID1-AS1 TWIST1 |        | 0.507574 | ≤0.0001  |
| HID1-AS1 CXCR4  |        | -0.33831 | 1.04E-08 |
| HIF1A-AS: HIF1A |        | 0.52272  | ≤0.0001  |
| HLA-F-AS BIRC5  |        | -0.34025 | 8.49E-09 |
| HLA-F-AS CXCL12 |        | 0.32136  | 5.96E-08 |
| HLX-AS1 CXCL12  |        | 0.601625 | ≤0.0001  |
| HLX-AS1 FZD4    |        | 0.547587 | ≤0.0001  |
| HLX-AS1 FGF2    |        | 0.534574 | ≤0.0001  |
| HLX-AS1 ZEB1    |        | 0.590469 | ≤0.0001  |
| HLX-AS1 TWIST2  |        | 0.459418 | 1.33E-15 |
| HLX-AS1 BIRC5   |        | -0.45669 | 2.00E-15 |
| HORMAD: FZD4    |        | 0.636975 | ≤0.0001  |
| HORMAD: ZEB1    |        | 0.513917 | ≤0.0001  |
| HORMAD: TWIST2  |        | 0.447622 | 8.44E-15 |
| HORMAD: FGF2    |        | 0.44543  | 1.15E-14 |
| HORMAD: CXCL12  |        | 0.404749 | 3.81E-12 |
| HORMAD: TWIST1  |        | 0.301007 | 4.21E-07 |
| HOTAIR CXCL12   |        | -0.34317 | 6.21E-09 |
| HOTAIR FGF2     |        | -0.32921 | 2.69E-08 |
| HOXA-AS: BIRC5  |        | -0.37747 | 1.22E-10 |
| HOXA-AS: CXCL12 |        | 0.338062 | 1.07E-08 |
| HOXA-AS: EGF    |        | 0.328029 | 3.04E-08 |
| HOXA-AS: EGF    |        | 0.321148 | 6.09E-08 |
| HOXA-AS: BIRC5  |        | -0.31065 | 1.70E-07 |
| HOXB-AS: CXCL12 |        | 0.580399 | ≤0.0001  |
| HOXB-AS: BIRC5  |        | -0.47305 | ≤0.0001  |
| HOXB-AS: FZD4   |        | 0.899671 | ≤0.0001  |
| HOXB-AS: FGF2   |        | 0.709274 | ≤0.0001  |
| HOXB-AS: TWIST2 |        | 0.848445 | ≤0.0001  |
| HOXB-AS: ZEB1   |        | 0.737311 | ≤0.0001  |
| HOXB-AS: TWIST1 |        | 0.584469 | ≤0.0001  |
| HOXB-AS: CXCR4  |        | -0.31956 | 7.12E-08 |
| HOXB-AS: ZEB1   |        | 0.428942 | 1.33E-13 |
| HOXC13-/FGF2    |        | -0.3226  | 5.26E-08 |
| HOXC-AS: HIF1A  |        | -0.339   | 9.70E-09 |
| HOXC-AS: TWIST2 |        | 0.325412 | 3.97E-08 |
| HOXC-AS: BIRC5  |        | -0.32445 | 4.37E-08 |
| HOXC-AS: TWIST1 |        | 0.318018 | 8.30E-08 |
| HOXC-AS: FZD4   |        | 0.300371 | 4.46E-07 |

|                 |          |          |
|-----------------|----------|----------|
| HOXC-AS:CDH2    | 0.348111 | 3.63E-09 |
| HOXC-AS:CXCL12  | -0.31569 | 1.04E-07 |
| HOXC-AS:BIRC5   | 0.402875 | 4.89E-12 |
| HOXC-AS:CXCL12  | -0.39737 | 1.01E-11 |
| HOXC-AS:CDH2    | 0.378606 | 1.07E-10 |
| HOXC-AS:FGF2    | -0.34107 | 7.78E-09 |
| HOXC-AS:ZEB1    | -0.31028 | 1.76E-07 |
| HOXC-AS:TWIST2  | -0.30413 | 3.15E-07 |
| HOXD-AS:CXCL12  | 0.606003 | ≤0.0001  |
| HOXD-AS:BIRC5   | -0.51225 | ≤0.0001  |
| HOXD-AS:FZD4    | 0.611917 | ≤0.0001  |
| HOXD-AS:FGF2    | 0.477685 | ≤0.0001  |
| HOXD-AS:TWIST2  | 0.621953 | ≤0.0001  |
| HOXD-AS:ZEB1    | 0.607055 | ≤0.0001  |
| HOXD-AS:TWIST1  | 0.443722 | 1.51E-14 |
| HPN-AS1 CXCL12  | -0.44776 | 7.99E-15 |
| HPN-AS1 ZEB1    | -0.43824 | 3.42E-14 |
| HPN-AS1 BIRC5   | 0.409967 | 1.89E-12 |
| HPN-AS1 FZD4    | -0.40694 | 2.85E-12 |
| HPN-AS1 TWIST2  | -0.36466 | 5.60E-10 |
| HS1BP3-ITZEB1   | 0.52873  | ≤0.0001  |
| HS1BP3-ITFZD4   | 0.411344 | 1.57E-12 |
| HS1BP3-ITFGF2   | 0.340789 | 8.02E-09 |
| HS1BP3-ITBIRC5  | -0.33815 | 1.06E-08 |
| HS1BP3-ITTWIST2 | 0.31664  | 9.50E-08 |
| HS1BP3-ITCXCL12 | 0.316209 | 9.91E-08 |
| HS6ST2-A CDH2   | 0.317162 | 9.03E-08 |
| HSD52 ZEB1      | 0.541907 | ≤0.0001  |
| HSD52 TWIST2    | 0.443476 | 1.55E-14 |
| HSD52 FZD4      | 0.438387 | 3.35E-14 |
| HSD52 FGF2      | 0.432047 | 8.53E-14 |
| HSD52 CXCL12    | 0.431621 | 9.06E-14 |
| HTR2A-AS:CDH2   | 0.352685 | 2.19E-09 |
| HUNK-AS:HIF1A   | 0.464152 | 6.66E-16 |
| HYI-AS1 TGFB1   | 0.512322 | ≤0.0001  |
| IGF2-AS TGFB1   | 0.357206 | 1.32E-09 |
| IGF2BP2-ACDH2   | 0.355361 | 1.62E-09 |
| IGFBP7-AS:PDGFB | 0.320828 | 6.28E-08 |
| IQCH-AS1 EGF    | 0.519401 | ≤0.0001  |
| IQCH-AS1 TGFB1  | -0.31943 | 7.22E-08 |
| IQCH-AS1 SNAI1  | -0.31188 | 1.51E-07 |
| ITGA9-AS:EGF    | 0.584135 | ≤0.0001  |
| ITGA9-AS:BIRC5  | -0.44686 | 9.33E-15 |
| ITGA9-AS:CXCL12 | 0.391827 | 2.05E-11 |
| ITGA9-AS:SNAI1  | -0.35182 | 2.41E-09 |
| ITGB2-AS:TGFB1  | 0.352338 | 2.27E-09 |
| JAZF1-AS:ZEB1   | 0.511914 | ≤0.0001  |
| JAZF1-AS:CXCL12 | 0.451702 | 4.44E-15 |
| JAZF1-AS:BIRC5  | -0.37795 | 1.15E-10 |
| JAZF1-AS:TWIST2 | 0.348249 | 3.57E-09 |
| JAZF1-AS:FZD4   | 0.325448 | 3.95E-08 |
| JAZF1-AS:TWIST1 | 0.301256 | 4.11E-07 |
| JAZF1-AS:FGF2   | 0.300153 | 4.55E-07 |
| KANSL1-ABIRC5   | -0.30212 | 3.79E-07 |
| KCNAB1-EGF      | 0.530723 | ≤0.0001  |
| KCNAB1-TGFB1    | 0.411069 | 1.63E-12 |
| KCNAB1-TWIST1   | 0.32559  | 3.90E-08 |
| KCNIP2-A FZD4   | 0.762029 | ≤0.0001  |

|                  |          |          |
|------------------|----------|----------|
| KCNIP2-A'FGF2    | 0.59146  | ≤0.0001  |
| KCNIP2-A'TWIST2  | 0.552198 | ≤0.0001  |
| KCNIP2-A'ZEB1    | 0.631453 | ≤0.0001  |
| KCNIP2-A'CXCL12  | 0.398121 | 9.12E-12 |
| KCNIP2-A'TWIST1  | 0.380318 | 8.64E-11 |
| KCNIP2-A'BIRC5   | -0.31963 | 7.07E-08 |
| KCNJ2-AS CXCL12  | 0.345573 | 4.79E-09 |
| KCNJ2-AS EGF     | 0.312798 | 1.38E-07 |
| KCNMA1- CDH2     | 0.341726 | 7.25E-09 |
| KCNMA1- ZEB1     | 0.303777 | 3.25E-07 |
| KCNQ1-A'ZEB1     | 0.486815 | ≤0.0001  |
| KCNQ1-A'CXCL12   | 0.349903 | 2.98E-09 |
| KCNQ1-A'FZD4     | 0.341777 | 7.21E-09 |
| KCNQ1-A'BIRC5    | -0.31609 | 1.00E-07 |
| KIAA0087 CXCL12  | 0.565871 | ≤0.0001  |
| KIAA0087 BIRC5   | -0.48041 | ≤0.0001  |
| KIAA0087 FZD4    | 0.479907 | ≤0.0001  |
| KIAA0087 FGF2    | 0.475355 | ≤0.0001  |
| KIAA0087 ZEB1    | 0.548623 | ≤0.0001  |
| KIAA0087 TWIST2  | 0.350095 | 2.92E-09 |
| KIF9-AS1 BIRC5   | -0.31471 | 1.15E-07 |
| KIRREL3-A BIRC5  | 0.33588  | 1.35E-08 |
| KIRREL3-A CXCL12 | -0.31933 | 7.29E-08 |
| KIRREL3-A CDH2   | 0.602907 | ≤0.0001  |
| KIZ-AS1 ZEB1     | 0.315548 | 1.06E-07 |
| KIZ-AS1 CDH2     | 0.302079 | 3.81E-07 |
| KLF3-AS1 EGF     | 0.495591 | ≤0.0001  |
| KLF3-AS1 BIRC5   | -0.41993 | 4.80E-13 |
| KLF3-AS1 CXCL12  | 0.391534 | 2.13E-11 |
| KLF3-AS1 ZEB1    | 0.387863 | 3.39E-11 |
| KLF3-AS1 SNAI1   | -0.34745 | 3.90E-09 |
| KLF3-AS1 FGF2    | 0.308513 | 2.08E-07 |
| KMT2E-AS FGF2    | -0.34505 | 5.07E-09 |
| KMT2E-AS CXCL12  | -0.32911 | 2.72E-08 |
| KMT2E-AS ZEB1    | -0.32382 | 4.66E-08 |
| KMT2E-AS FZD4    | -0.30668 | 2.48E-07 |
| KRTAP5-A FGF2    | -0.32485 | 4.20E-08 |
| KRTAP5-A HIF1A   | 0.321008 | 6.17E-08 |
| KTN1-AS1 EGF     | 0.548699 | ≤0.0001  |
| KTN1-AS1 BIRC5   | -0.41612 | 8.16E-13 |
| KTN1-AS1 CXCL12  | 0.394312 | 1.49E-11 |
| L3MBTL4- CDH2    | 0.320754 | 6.33E-08 |
| LAMP5-A'CDH2     | 0.389998 | 2.59E-11 |
| LAMTOR5 CDH2     | 0.323572 | 4.78E-08 |
| LANCL1-A ZEB1    | 0.399984 | 7.15E-12 |
| LARS2-AS CDH2    | 0.319105 | 7.45E-08 |
| LDLRAD4- ZEB1    | 0.319921 | 6.87E-08 |
| LEF1-AS1 TGFB1   | 0.693009 | ≤0.0001  |
| LENG8-AS EGF     | 0.326736 | 3.47E-08 |
| LIFR-AS1 BIRC5   | -0.48752 | ≤0.0001  |
| LIFR-AS1 EGF     | 0.624115 | ≤0.0001  |
| LIFR-AS1 CXCL12  | 0.442895 | 1.69E-14 |
| LIFR-AS1 SNAI1   | -0.38127 | 7.69E-11 |
| LIFR-AS1 FGF2    | 0.308002 | 2.19E-07 |
| LIMD1-AS EGF     | 0.448829 | 6.88E-15 |
| LINC00111 CXCL12 | -0.39073 | 2.36E-11 |
| LINC00111 FZD4   | -0.3699  | 3.03E-10 |
| LINC00111 FGF2   | -0.35591 | 1.52E-09 |

|          |        |          |          |
|----------|--------|----------|----------|
| LINC0011 | EWIST2 | -0.30781 | 2.23E-07 |
| LINC0017 | EGF    | 0.464531 | 4.44E-16 |
| LINC0017 | HIF1A  | 0.314525 | 1.17E-07 |
| LINC0018 | TGFB1  | 0.377308 | 1.25E-10 |
| LINC0020 | FZD4   | -0.38053 | 8.42E-11 |
| LINC0020 | EWIST2 | -0.37126 | 2.58E-10 |
| LINC0020 | ZEB1   | -0.36455 | 5.68E-10 |
| LINC0020 | CXCL12 | -0.3496  | 3.08E-09 |
| LINC0021 | CDH2   | 0.352097 | 2.34E-09 |
| LINC0021 | CXCL12 | 0.353102 | 2.09E-09 |
| LINC0021 | BIRC5  | -0.30787 | 2.21E-07 |
| LINC0022 | HIF1A  | 0.300065 | 4.59E-07 |
| LINC0023 | FZD4   | -0.35751 | 1.27E-09 |
| LINC0023 | ZEB1   | -0.34127 | 7.61E-09 |
| LINC0023 | FGF2   | -0.31039 | 1.74E-07 |
| LINC0024 | FZD4   | -0.32583 | 3.80E-08 |
| LINC0024 | ZEB1   | -0.31376 | 1.26E-07 |
| LINC0024 | CXCL12 | 0.399339 | 7.78E-12 |
| LINC0024 | EWIST2 | 0.333243 | 1.78E-08 |
| LINC0026 | BIRC5  | -0.35323 | 2.06E-09 |
| LINC0026 | CXCL12 | 0.319185 | 7.39E-08 |
| LINC0026 | BIRC5  | -0.3187  | 7.76E-08 |
| LINC0026 | EGF    | 0.317192 | 9.00E-08 |
| LINC0027 | BIRC5  | -0.48226 | ≤0.0001  |
| LINC0027 | EGF    | 0.465762 | 4.44E-16 |
| LINC0027 | CXCL12 | 0.431503 | 9.21E-14 |
| LINC0030 | CDH2   | 0.576785 | ≤0.0001  |
| LINC0031 | ZEB1   | 0.427626 | 1.61E-13 |
| LINC0031 | CDH2   | 0.331754 | 2.07E-08 |
| LINC0031 | ZEB1   | 0.30203  | 3.83E-07 |
| LINC0032 | BIRC5  | -0.43644 | 4.46E-14 |
| LINC0032 | EGF    | 0.367501 | 4.02E-10 |
| LINC0032 | CXCL12 | 0.344631 | 5.30E-09 |
| LINC0033 | ZEB1   | 0.451302 | 4.66E-15 |
| LINC0033 | FZD4   | 0.358397 | 1.15E-09 |
| LINC0033 | EWIST2 | 0.336028 | 1.33E-08 |
| LINC0033 | HIF1A  | 0.334081 | 1.63E-08 |
| LINC0033 | CXCL12 | -0.47238 | ≤0.0001  |
| LINC0033 | ZEB1   | -0.42006 | 4.72E-13 |
| LINC0033 | BIRC5  | 0.400043 | 7.10E-12 |
| LINC0033 | FZD4   | -0.37515 | 1.62E-10 |
| LINC0033 | EWIST2 | -0.33481 | 1.51E-08 |
| LINC0035 | CDH2   | 0.34131  | 7.58E-09 |
| LINC0036 | ZEB1   | 0.407526 | 2.63E-12 |
| LINC0037 | ZEB1   | 0.369505 | 3.18E-10 |
| LINC0039 | CXCL12 | 0.479619 | ≤0.0001  |
| LINC0039 | BIRC5  | -0.47696 | ≤0.0001  |
| LINC0039 | FZD4   | 0.589355 | ≤0.0001  |
| LINC0039 | FGF2   | 0.522159 | ≤0.0001  |
| LINC0039 | ZEB1   | 0.550092 | ≤0.0001  |
| LINC0039 | EWIST2 | 0.424096 | 2.67E-13 |
| LINC0040 | CXCR4  | 0.333418 | 1.74E-08 |
| LINC0040 | CDH2   | 0.560611 | ≤0.0001  |
| LINC0042 | CXCR4  | 0.362387 | 7.29E-10 |
| LINC0042 | CXCR4  | 0.382973 | 6.23E-11 |
| LINC0042 | TGFB1  | 0.307184 | 2.36E-07 |
| LINC0042 | TGFB1  | 0.305643 | 2.73E-07 |
| LINC0043 | CDH2   | 0.325343 | 3.99E-08 |

|           |        |          |          |
|-----------|--------|----------|----------|
| LINC0044C | CDH2   | 0.325832 | 3.80E-08 |
| LINC0044E | EGF    | 0.463022 | 8.88E-16 |
| LINC0045Z | PDGFB  | 0.316162 | 9.95E-08 |
| LINC0046J | BIRC5  | 0.362689 | 7.04E-10 |
| LINC0046J | CXCL12 | -0.34895 | 3.31E-09 |
| LINC0046E | BIRC5  | 0.380696 | 8.25E-11 |
| LINC0047Z | EGF    | 0.536283 | ≤0.0001  |
| LINC0047Z | BIRC5  | -0.40749 | 2.64E-12 |
| LINC0047Z | CXCL12 | 0.391609 | 2.11E-11 |
| LINC0047Z | SNAI1  | -0.30289 | 3.53E-07 |
| LINC0047Z | HIF1A  | 0.355184 | 1.65E-09 |
| LINC0048Z | ZEB1   | 0.50955  | ≤0.0001  |
| LINC0048Z | FZD4   | 0.385261 | 4.69E-11 |
| LINC0048Z | TWIST2 | 0.331717 | 2.08E-08 |
| LINC0049C | CDH2   | 0.336686 | 1.24E-08 |
| LINC0050C | CDH2   | 0.312308 | 1.45E-07 |
| LINC0050Z | BIRC5  | -0.48543 | ≤0.0001  |
| LINC0050Z | CXCL12 | 0.44142  | 2.13E-14 |
| LINC0050Z | EGF    | 0.426481 | 1.90E-13 |
| LINC0050E | EGF    | 0.323871 | 4.63E-08 |
| LINC00507 | HIF1A  | 0.314736 | 1.14E-07 |
| LINC0051J | CXCL12 | -0.4524  | 4.00E-15 |
| LINC0051J | BIRC5  | 0.444617 | 1.31E-14 |
| LINC0051J | FZD4   | -0.35444 | 1.80E-09 |
| LINC0051J | ZEB1   | -0.3172  | 8.99E-08 |
| LINC0051J | TWIST2 | -0.31375 | 1.26E-07 |
| LINC00517 | CXCL12 | 0.372898 | 2.12E-10 |
| LINC00517 | BIRC5  | -0.33323 | 1.78E-08 |
| LINC00517 | ZEB1   | 0.300833 | 4.28E-07 |
| LINC0052E | SNAI1  | -0.31866 | 7.78E-08 |
| LINC0052E | TGFB1  | 0.373625 | 1.95E-10 |
| LINC0052E | CXCR4  | 0.353522 | 1.99E-09 |
| LINC0053E | ZEB1   | 0.32995  | 2.50E-08 |
| LINC0053E | CDH2   | 0.364773 | 5.53E-10 |
| LINC0055Z | CXCR4  | 0.388505 | 3.12E-11 |
| LINC0056J | ZEB1   | 0.31189  | 1.51E-07 |
| LINC0056Z | BIRC5  | -0.35923 | 1.05E-09 |
| LINC0056Z | ZEB1   | 0.35827  | 1.17E-09 |
| LINC0056Z | CXCL12 | 0.349103 | 3.25E-09 |
| LINC0056E | PDGFB  | 0.360174 | 9.39E-10 |
| LINC0057C | FGF2   | 0.369249 | 3.27E-10 |
| LINC0057J | ZEB1   | 0.318407 | 7.99E-08 |
| LINC0057Z | CXCL12 | 0.503208 | ≤0.0001  |
| LINC0057Z | BIRC5  | -0.4008  | 6.43E-12 |
| LINC0057Z | FGF2   | 0.367158 | 4.18E-10 |
| LINC0057Z | EGF    | 0.335637 | 1.38E-08 |
| LINC0057Z | ZEB1   | 0.330189 | 2.44E-08 |
| LINC0057Z | FZD4   | 0.322483 | 5.33E-08 |
| LINC0058J | CDH2   | 0.383309 | 5.98E-11 |
| LINC0059Z | ZEB1   | -0.33133 | 2.17E-08 |
| LINC0059Z | FZD4   | -0.32318 | 4.96E-08 |
| LINC0059Z | FGF2   | -0.30065 | 4.35E-07 |
| LINC0059E | ZEB1   | 0.569262 | ≤0.0001  |
| LINC0059E | BIRC5  | -0.35196 | 2.37E-09 |
| LINC0059E | TWIST1 | 0.319045 | 7.50E-08 |
| LINC0059E | FZD4   | 0.300431 | 4.44E-07 |
| LINC0059C | CDH2   | 0.418666 | 5.73E-13 |
| LINC0059C | TWIST1 | 0.323032 | 5.04E-08 |

|           |        |          |          |
|-----------|--------|----------|----------|
| LINC00603 | CXCL12 | 0.383913 | 5.55E-11 |
| LINC00607 | TGFB1  | 0.392789 | 1.81E-11 |
| LINC00624 | HIF1A  | 0.39578  | 1.24E-11 |
| LINC00626 | TGFB1  | 0.489218 | ≤0.0001  |
| LINC00632 | FZD4   | 0.473071 | ≤0.0001  |
| LINC00632 | TWIST1 | 0.485613 | ≤0.0001  |
| LINC00632 | TWIST2 | 0.457768 | 1.78E-15 |
| LINC00632 | ZEB1   | 0.454165 | 3.11E-15 |
| LINC00632 | FGF2   | 0.328502 | 2.90E-08 |
| LINC00635 | FZD4   | 0.464657 | 4.44E-16 |
| LINC00635 | TWIST2 | 0.406548 | 3.00E-12 |
| LINC00635 | ZEB1   | 0.388389 | 3.17E-11 |
| LINC00635 | FGF2   | 0.338323 | 1.04E-08 |
| LINC00635 | CXCL12 | 0.329053 | 2.74E-08 |
| LINC00636 | CXCL12 | 0.4771   | ≤0.0001  |
| LINC00640 | EGF    | 0.675018 | ≤0.0001  |
| LINC00640 | BIRC5  | -0.41363 | 1.15E-12 |
| LINC00640 | CXCL12 | 0.368037 | 3.77E-10 |
| LINC00641 | CXCL12 | 0.628127 | ≤0.0001  |
| LINC00641 | BIRC5  | -0.58649 | ≤0.0001  |
| LINC00641 | FZD4   | 0.621626 | ≤0.0001  |
| LINC00641 | FGF2   | 0.629981 | ≤0.0001  |
| LINC00641 | ZEB1   | 0.679503 | ≤0.0001  |
| LINC00641 | TWIST2 | 0.470135 | 2.22E-16 |
| LINC00641 | EGF    | 0.358221 | 1.17E-09 |
| LINC00641 | CXCR4  | -0.32467 | 4.28E-08 |
| LINC00641 | SNAI1  | -0.32464 | 4.29E-08 |
| LINC00641 | TGFB1  | -0.30277 | 3.57E-07 |
| LINC00643 | FZD4   | 0.466404 | 4.44E-16 |
| LINC00643 | TWIST2 | 0.45042  | 5.33E-15 |
| LINC00643 | FGF2   | 0.42829  | 1.47E-13 |
| LINC00643 | ZEB1   | 0.389224 | 2.85E-11 |
| LINC00645 | ZEB1   | 0.496862 | ≤0.0001  |
| LINC00654 | ZEB1   | 0.421535 | 3.83E-13 |
| LINC00654 | FGF2   | 0.34801  | 3.67E-09 |
| LINC00654 | FZD4   | 0.328042 | 3.04E-08 |
| LINC00665 | CXCL12 | -0.42912 | 1.30E-13 |
| LINC00665 | BIRC5  | 0.414441 | 1.03E-12 |
| LINC00665 | ZEB1   | -0.4046  | 3.89E-12 |
| LINC00665 | FZD4   | -0.39864 | 8.53E-12 |
| LINC00665 | TWIST2 | -0.38503 | 4.83E-11 |
| LINC00665 | FGF2   | -0.37204 | 2.35E-10 |
| LINC00667 | CXCL12 | 0.618861 | ≤0.0001  |
| LINC00667 | FZD4   | 0.617302 | ≤0.0001  |
| LINC00667 | FGF2   | 0.654524 | ≤0.0001  |
| LINC00667 | TWIST2 | 0.477844 | ≤0.0001  |
| LINC00667 | ZEB1   | 0.563172 | ≤0.0001  |
| LINC00667 | BIRC5  | -0.44462 | 1.31E-14 |
| LINC00667 | TWIST1 | 0.341754 | 7.23E-09 |
| LINC00667 | SNAI1  | -0.30445 | 3.05E-07 |
| LINC00670 | ZEB1   | 0.427896 | 1.55E-13 |
| LINC00670 | CXCL12 | 0.362412 | 7.26E-10 |
| LINC00670 | FZD4   | 0.358503 | 1.14E-09 |
| LINC00670 | FGF2   | 0.35303  | 2.11E-09 |
| LINC00671 | CXCL12 | 0.626688 | ≤0.0001  |
| LINC00671 | BIRC5  | -0.47503 | ≤0.0001  |
| LINC00671 | FZD4   | 0.813189 | ≤0.0001  |
| LINC00671 | FGF2   | 0.6188   | ≤0.0001  |

|           |        |          |          |
|-----------|--------|----------|----------|
| LINC00671 | TWIST2 | 0.687138 | ≤0.0001  |
| LINC00671 | ZEB1   | 0.644975 | ≤0.0001  |
| LINC00671 | TWIST1 | 0.514211 | ≤0.0001  |
| LINC00671 | CXCR4  | -0.30707 | 2.39E-07 |
| LINC00680 | BIRC5  | 0.437014 | 4.11E-14 |
| LINC00680 | CXCL12 | -0.41125 | 1.59E-12 |
| LINC00680 | FZD4   | -0.37337 | 2.01E-10 |
| LINC00680 | FGF2   | -0.37226 | 2.29E-10 |
| LINC00680 | TWIST2 | -0.33425 | 1.60E-08 |
| LINC00680 | CXCR4  | 0.316748 | 9.40E-08 |
| LINC00681 | CDH2   | 0.495341 | ≤0.0001  |
| LINC00702 | CXCL12 | 0.576992 | ≤0.0001  |
| LINC00702 | FZD4   | 0.581698 | ≤0.0001  |
| LINC00702 | FGF2   | 0.501057 | ≤0.0001  |
| LINC00702 | TWIST2 | 0.479373 | ≤0.0001  |
| LINC00702 | ZEB1   | 0.672844 | ≤0.0001  |
| LINC00702 | BIRC5  | -0.41811 | 6.19E-13 |
| LINC00702 | TWIST1 | 0.305576 | 2.75E-07 |
| LINC00710 | ZEB1   | 0.457317 | 1.78E-15 |
| LINC00835 | CXCL12 | -0.30541 | 2.79E-07 |
| LINC00840 | CXCL12 | 0.537381 | ≤0.0001  |
| LINC00840 | ZEB1   | 0.543189 | ≤0.0001  |
| LINC00840 | FZD4   | 0.450879 | 4.88E-15 |
| LINC00840 | FGF2   | 0.404203 | 4.10E-12 |
| LINC00840 | BIRC5  | -0.38989 | 2.62E-11 |
| LINC00840 | TWIST2 | 0.369386 | 3.22E-10 |
| LINC00840 | ZEB1   | 0.311007 | 1.64E-07 |
| LINC00840 | BIRC5  | -0.43623 | 4.62E-14 |
| LINC00840 | CXCL12 | 0.423499 | 2.90E-13 |
| LINC00840 | EGF    | 0.356956 | 1.35E-09 |
| LINC00850 | ZEB1   | -0.30206 | 3.82E-07 |
| LINC00861 | CXCR4  | 0.34611  | 4.51E-09 |
| LINC00862 | HIF1A  | 0.372688 | 2.18E-10 |
| LINC00862 | BIRC5  | -0.30499 | 2.90E-07 |
| LINC00860 | EGF    | 0.440309 | 2.51E-14 |
| LINC00877 | TGFB1  | 0.413452 | 1.18E-12 |
| LINC00882 | CXCL12 | 0.362352 | 7.32E-10 |
| LINC00882 | ZEB1   | 0.349527 | 3.10E-09 |
| LINC00882 | BIRC5  | -0.33886 | 9.84E-09 |
| LINC00880 | ZEB1   | -0.3702  | 2.92E-10 |
| LINC00880 | FZD4   | -0.32411 | 4.53E-08 |
| LINC00880 | BIRC5  | -0.52361 | ≤0.0001  |
| LINC00880 | CXCL12 | 0.4566   | 2.00E-15 |
| LINC00880 | EGF    | 0.435471 | 5.15E-14 |
| LINC00880 | FGF2   | 0.38657  | 3.98E-11 |
| LINC00880 | ZEB1   | 0.318217 | 8.14E-08 |
| LINC00880 | FZD4   | 0.315584 | 1.05E-07 |
| LINC00891 | CXCL12 | 0.528031 | ≤0.0001  |
| LINC00891 | FZD4   | 0.5713   | ≤0.0001  |
| LINC00891 | FGF2   | 0.495307 | ≤0.0001  |
| LINC00891 | TWIST2 | 0.521341 | ≤0.0001  |
| LINC00891 | ZEB1   | 0.579414 | ≤0.0001  |
| LINC00891 | BIRC5  | -0.38113 | 7.82E-11 |
| LINC00892 | TGFB1  | 0.351507 | 2.49E-09 |
| LINC00892 | CXCR4  | 0.334539 | 1.55E-08 |
| LINC00890 | EGF    | 0.465543 | 4.44E-16 |
| LINC00890 | BIRC5  | -0.43482 | 5.68E-14 |
| LINC00890 | CXCL12 | 0.351842 | 2.40E-09 |

|           |        |          |          |
|-----------|--------|----------|----------|
| LINC00893 | ZEB1   | 0.306936 | 2.42E-07 |
| LINC00894 | ZEB1   | 0.300687 | 4.33E-07 |
| LINC00895 | EGF    | 0.339271 | 9.42E-09 |
| LINC00901 | CDH2   | 0.352384 | 2.26E-09 |
| LINC00903 | CDH2   | 0.352306 | 2.28E-09 |
| LINC00906 | FZD4   | 0.497029 | ≤0.0001  |
| LINC00906 | ZEB1   | 0.480718 | ≤0.0001  |
| LINC00906 | FGF2   | 0.455041 | 2.66E-15 |
| LINC00906 | CXCL12 | 0.443809 | 1.49E-14 |
| LINC00906 | TWIST2 | 0.37546  | 1.56E-10 |
| LINC00906 | TWIST1 | 0.352908 | 2.13E-09 |
| LINC00906 | BIRC5  | -0.32494 | 4.16E-08 |
| LINC00908 | CXCL12 | 0.645618 | ≤0.0001  |
| LINC00908 | BIRC5  | -0.5165  | ≤0.0001  |
| LINC00908 | EGF    | 0.426309 | 1.95E-13 |
| LINC00908 | ZEB1   | 0.31832  | 8.05E-08 |
| LINC00908 | FGF2   | 0.308835 | 2.02E-07 |
| LINC00909 | EGF    | 0.344005 | 5.67E-09 |
| LINC00910 | BIRC5  | -0.4297  | 1.20E-13 |
| LINC00910 | CXCL12 | 0.34236  | 6.77E-09 |
| LINC00910 | EGF    | 0.3187   | 7.76E-08 |
| LINC00910 | FGF2   | 0.300443 | 4.43E-07 |
| LINC00920 | EGF    | 0.457738 | 1.78E-15 |
| LINC00920 | BIRC5  | -0.37174 | 2.44E-10 |
| LINC00921 | CXCL12 | 0.561086 | ≤0.0001  |
| LINC00921 | BIRC5  | -0.58279 | ≤0.0001  |
| LINC00921 | FZD4   | 0.492493 | ≤0.0001  |
| LINC00921 | FGF2   | 0.497591 | ≤0.0001  |
| LINC00921 | ZEB1   | 0.457138 | 1.78E-15 |
| LINC00921 | TWIST2 | 0.40381  | 4.32E-12 |
| LINC00921 | HIF1A  | -0.30472 | 2.98E-07 |
| LINC00924 | CXCL12 | 0.630872 | ≤0.0001  |
| LINC00924 | ZEB1   | 0.509562 | ≤0.0001  |
| LINC00924 | BIRC5  | -0.43164 | 9.02E-14 |
| LINC00924 | FZD4   | 0.427817 | 1.57E-13 |
| LINC00924 | FGF2   | 0.423628 | 2.85E-13 |
| LINC00924 | TWIST2 | 0.339761 | 8.94E-09 |
| LINC00924 | TWIST1 | 0.329936 | 2.50E-08 |
| LINC00928 | CDH2   | 0.317863 | 8.42E-08 |
| LINC00944 | BIRC5  | 0.326093 | 3.70E-08 |
| LINC00957 | HIF1A  | -0.31022 | 1.77E-07 |
| LINC00968 | FZD4   | 0.510782 | ≤0.0001  |
| LINC00968 | ZEB1   | 0.510168 | ≤0.0001  |
| LINC00968 | FGF2   | 0.440816 | 2.33E-14 |
| LINC00968 | TWIST2 | 0.408871 | 2.19E-12 |
| LINC00968 | CXCL12 | 0.374609 | 1.73E-10 |
| LINC00974 | TWIST2 | 0.397158 | 1.03E-11 |
| LINC00974 | FZD4   | 0.394561 | 1.45E-11 |
| LINC00982 | CXCL12 | 0.492112 | ≤0.0001  |
| LINC00982 | FZD4   | 0.543044 | ≤0.0001  |
| LINC00982 | TWIST2 | 0.510414 | ≤0.0001  |
| LINC00982 | ZEB1   | 0.459665 | 1.33E-15 |
| LINC00982 | FGF2   | 0.434785 | 5.71E-14 |
| LINC00982 | BIRC5  | -0.40566 | 3.38E-12 |
| LINC00982 | TWIST1 | 0.3247   | 4.26E-08 |
| LINC00985 | CXCL12 | 0.62656  | ≤0.0001  |
| LINC00985 | BIRC5  | -0.51663 | ≤0.0001  |
| LINC00985 | FZD4   | 0.672576 | ≤0.0001  |



|          |        |          |          |
|----------|--------|----------|----------|
| LINC0098 | FGF2   | 0.577935 | ≤0.0001  |
| LINC0098 | TWIST2 | 0.588301 | ≤0.0001  |
| LINC0098 | ZEB1   | 0.682394 | ≤0.0001  |
| LINC0098 | TWIST1 | 0.455433 | 2.44E-15 |
| LINC0099 | BIRC5  | -0.41454 | 1.01E-12 |
| LINC0099 | EGF    | 0.382535 | 6.58E-11 |
| LINC0099 | CXCL12 | 0.366962 | 4.28E-10 |
| LINC0099 | ZEB1   | 0.379612 | 9.42E-11 |
| LINC0099 | CXCL12 | 0.425877 | 2.07E-13 |
| LINC0099 | BIRC5  | -0.34026 | 8.48E-09 |
| LINC0100 | CXCL12 | -0.45422 | 3.11E-15 |
| LINC0100 | ZEB1   | -0.41431 | 1.05E-12 |
| LINC0100 | BIRC5  | 0.373278 | 2.03E-10 |
| LINC0100 | TWIST2 | -0.36523 | 5.24E-10 |
| LINC0100 | FZD4   | -0.34436 | 5.46E-09 |
| LINC0100 | FGF2   | -0.33885 | 9.85E-09 |
| LINC0100 | TWIST1 | -0.31409 | 1.22E-07 |
| LINC0101 | CXCL12 | -0.33239 | 1.94E-08 |
| LINC0101 | CDH2   | 0.329719 | 2.56E-08 |
| LINC0101 | FZD4   | -0.32925 | 2.68E-08 |
| LINC0101 | TWIST2 | -0.31509 | 1.11E-07 |
| LINC0101 | TGFB1  | 0.421843 | 3.67E-13 |
| LINC0101 | ZEB1   | 0.302251 | 3.75E-07 |
| LINC0101 | HIF1A  | 0.308371 | 2.11E-07 |
| LINC0102 | TGFB1  | 0.423137 | 3.06E-13 |
| LINC0102 | TWIST1 | 0.348346 | 3.54E-09 |
| LINC0102 | CXCL12 | 0.340316 | 8.43E-09 |
| LINC0103 | CDH2   | 0.321848 | 5.68E-08 |
| LINC0103 | CDH2   | 0.332434 | 1.93E-08 |
| LINC0104 | ZEB1   | 0.329233 | 2.69E-08 |
| LINC0104 | FZD4   | 0.31981  | 6.95E-08 |
| LINC0104 | FZD4   | 0.713667 | ≤0.0001  |
| LINC0104 | FGF2   | 0.554336 | ≤0.0001  |
| LINC0104 | TWIST2 | 0.575637 | ≤0.0001  |
| LINC0104 | ZEB1   | 0.563196 | ≤0.0001  |
| LINC0104 | CXCL12 | 0.373452 | 1.99E-10 |
| LINC0104 | TWIST1 | 0.312118 | 1.47E-07 |
| LINC0105 | TGFB1  | 0.413935 | 1.10E-12 |
| LINC0105 | SNAI1  | 0.314685 | 1.15E-07 |
| LINC0105 | CXCL12 | 0.410318 | 1.80E-12 |
| LINC0105 | CXCL12 | 0.573849 | ≤0.0001  |
| LINC0105 | BIRC5  | -0.53955 | ≤0.0001  |
| LINC0105 | FZD4   | 0.618072 | ≤0.0001  |
| LINC0105 | FGF2   | 0.623506 | ≤0.0001  |
| LINC0105 | ZEB1   | 0.546306 | ≤0.0001  |
| LINC0105 | TWIST2 | 0.460179 | 1.11E-15 |
| LINC0106 | EGF    | 0.349961 | 2.96E-09 |
| LINC0106 | CXCL12 | -0.35726 | 1.31E-09 |
| LINC0106 | BIRC5  | 0.3428   | 6.46E-09 |
| LINC0106 | ZEB1   | -0.33307 | 1.81E-08 |
| LINC0106 | FGF2   | -0.31911 | 7.45E-08 |
| LINC0107 | CXCL12 | 0.614474 | ≤0.0001  |
| LINC0107 | FZD4   | 0.836583 | ≤0.0001  |
| LINC0107 | FGF2   | 0.69566  | ≤0.0001  |
| LINC0107 | TWIST2 | 0.700154 | ≤0.0001  |
| LINC0107 | ZEB1   | 0.666748 | ≤0.0001  |
| LINC0107 | BIRC5  | -0.42581 | 2.09E-13 |
| LINC0107 | TWIST1 | 0.39835  | 8.85E-12 |

|           |        |          |          |
|-----------|--------|----------|----------|
| LINC0108C | HIF1A  | 0.314581 | 1.16E-07 |
| LINC0108Z | FZD4   | 0.664629 | ≤0.0001  |
| LINC0108Z | TWIST2 | 0.607364 | ≤0.0001  |
| LINC0108Z | ZEB1   | 0.514921 | ≤0.0001  |
| LINC0108Z | FGF2   | 0.455622 | 2.44E-15 |
| LINC0108Z | CXCL12 | 0.381683 | 7.31E-11 |
| LINC0108Z | CXCL12 | 0.438592 | 3.24E-14 |
| LINC0108Z | BIRC5  | -0.39173 | 2.08E-11 |
| LINC0108Z | EGF    | 0.315212 | 1.09E-07 |
| LINC0109J | ZEB1   | 0.450995 | 4.88E-15 |
| LINC0109Z | HIF1A  | 0.409085 | 2.13E-12 |
| LINC0109Z | CXCL12 | -0.352   | 2.36E-09 |
| LINC0109Z | TWIST2 | -0.35053 | 2.78E-09 |
| LINC0109Z | FZD4   | -0.34809 | 3.64E-09 |
| LINC0109Z | CDH2   | 0.370822 | 2.72E-10 |
| LINC0110Z | TGFB1  | 0.331634 | 2.10E-08 |
| LINC0110Z | CDH2   | 0.400779 | 6.44E-12 |
| LINC0112Z | CDH2   | 0.321092 | 6.12E-08 |
| LINC0112Z | SNAI1  | 0.313504 | 1.29E-07 |
| LINC0112Z | CXCL12 | 0.554637 | ≤0.0001  |
| LINC0112Z | BIRC5  | -0.47354 | ≤0.0001  |
| LINC0112Z | FZD4   | 0.786445 | ≤0.0001  |
| LINC0112Z | FGF2   | 0.681888 | ≤0.0001  |
| LINC0112Z | TWIST2 | 0.645144 | ≤0.0001  |
| LINC0112Z | ZEB1   | 0.697979 | ≤0.0001  |
| LINC0112Z | TWIST1 | 0.430359 | 1.09E-13 |
| LINC0113Z | HIF1A  | 0.398119 | 9.12E-12 |
| LINC0113Z | BIRC5  | -0.36017 | 9.39E-10 |
| LINC0113Z | ZEB1   | 0.344872 | 5.16E-09 |
| LINC0113Z | CXCL12 | 0.33361  | 1.71E-08 |
| LINC0113Z | FGF2   | 0.318756 | 7.71E-08 |
| LINC0113Z | FZD4   | 0.301984 | 3.84E-07 |
| LINC0114C | CXCL12 | 0.514668 | ≤0.0001  |
| LINC0114C | FZD4   | 0.766118 | ≤0.0001  |
| LINC0114C | FGF2   | 0.653206 | ≤0.0001  |
| LINC0114C | TWIST2 | 0.728385 | ≤0.0001  |
| LINC0114C | ZEB1   | 0.649806 | ≤0.0001  |
| LINC0114C | TWIST1 | 0.446599 | 9.77E-15 |
| LINC0114C | BIRC5  | -0.32667 | 3.49E-08 |
| LINC0114Z | TGFB1  | 0.454347 | 2.89E-15 |
| LINC0114Z | TWIST1 | 0.33278  | 1.86E-08 |
| LINC0114Z | CXCL12 | -0.36741 | 4.06E-10 |
| LINC0114Z | BIRC5  | 0.318885 | 7.62E-08 |
| LINC0114Z | FZD4   | -0.30448 | 3.04E-07 |
| LINC0114Z | ZEB1   | -0.36575 | 4.94E-10 |
| LINC0114Z | FZD4   | -0.32411 | 4.52E-08 |
| LINC0115C | TGFB1  | 0.408519 | 2.30E-12 |
| LINC0115Z | EGF    | 0.434509 | 5.95E-14 |
| LINC0115Z | CDH2   | 0.554042 | ≤0.0001  |
| LINC0117Z | HIF1A  | 0.386912 | 3.82E-11 |
| LINC0118Z | EGF    | 0.308617 | 2.06E-07 |
| LINC0118Z | FZD4   | 0.591704 | ≤0.0001  |
| LINC0118Z | FGF2   | 0.475665 | ≤0.0001  |
| LINC0118Z | TWIST2 | 0.521429 | ≤0.0001  |
| LINC0118Z | ZEB1   | 0.455871 | 2.22E-15 |
| LINC0118Z | CXCL12 | 0.39978  | 7.34E-12 |
| LINC0118Z | BIRC5  | -0.31169 | 1.54E-07 |
| LINC0119Z | CXCL12 | 0.775981 | ≤0.0001  |

|                 |          |          |
|-----------------|----------|----------|
| LINC01197BIRC5  | -0.54032 | ≤0.0001  |
| LINC01197FZD4   | 0.642322 | ≤0.0001  |
| LINC01197FGF2   | 0.582583 | ≤0.0001  |
| LINC01197TWIST2 | 0.529828 | ≤0.0001  |
| LINC01197ZEB1   | 0.705506 | ≤0.0001  |
| LINC01197TWIST1 | 0.410822 | 1.69E-12 |
| LINC01197EGF    | 0.331515 | 2.13E-08 |
| LINC01207CDH2   | 0.326831 | 3.44E-08 |
| LINC01207CXCR4  | 0.328715 | 2.83E-08 |
| LINC01214TGFB1  | 0.3019   | 3.87E-07 |
| LINC01215CXCR4  | 0.354594 | 1.77E-09 |
| LINC01227CXCL12 | 0.521503 | ≤0.0001  |
| LINC01227FZD4   | 0.619009 | ≤0.0001  |
| LINC01227FGF2   | 0.536249 | ≤0.0001  |
| LINC01227TWIST2 | 0.605315 | ≤0.0001  |
| LINC01227ZEB1   | 0.554785 | ≤0.0001  |
| LINC01227BIRC5  | -0.44478 | 1.29E-14 |
| LINC01227TWIST1 | 0.434264 | 6.15E-14 |
| LINC01227CXCR4  | -0.30563 | 2.73E-07 |
| LINC01227TGFB1  | 0.384818 | 4.96E-11 |
| LINC01237FZD4   | 0.510451 | ≤0.0001  |
| LINC01237FGF2   | 0.519426 | ≤0.0001  |
| LINC01237TWIST2 | 0.580896 | ≤0.0001  |
| LINC01237TWIST1 | 0.475824 | ≤0.0001  |
| LINC01237ZEB1   | 0.459767 | 1.33E-15 |
| LINC01237CXCL12 | 0.317522 | 8.71E-08 |
| LINC01237EGF    | 0.47861  | ≤0.0001  |
| LINC01237BIRC5  | -0.31827 | 8.09E-08 |
| LINC01237FZD4   | 0.612897 | ≤0.0001  |
| LINC01237FGF2   | 0.538032 | ≤0.0001  |
| LINC01237TWIST2 | 0.525084 | ≤0.0001  |
| LINC01237ZEB1   | 0.543357 | ≤0.0001  |
| LINC01237TWIST1 | 0.386224 | 4.16E-11 |
| LINC01237CXCL12 | 0.320539 | 6.47E-08 |
| LINC01247CDH2   | 0.308518 | 2.08E-07 |
| LINC01247BIRC5  | 0.376697 | 1.34E-10 |
| LINC01267FZD4   | 0.441638 | 2.04E-14 |
| LINC01267TWIST2 | 0.351226 | 2.57E-09 |
| LINC01267EGF    | 0.562871 | ≤0.0001  |
| LINC01267BIRC5  | -0.42679 | 1.82E-13 |
| LINC01267CXCL12 | 0.416874 | 7.35E-13 |
| LINC01267BIRC5  | -0.42289 | 3.17E-13 |
| LINC01267CXCL12 | 0.407223 | 2.74E-12 |
| LINC01267EGF    | 0.370825 | 2.72E-10 |
| LINC01277EGF    | 0.330162 | 2.44E-08 |
| LINC01287CXCR4  | 0.403209 | 4.68E-12 |
| LINC01287TGFB1  | 0.327257 | 3.29E-08 |
| LINC01287TGFB1  | 0.429363 | 1.26E-13 |
| LINC01307TWIST1 | 0.358405 | 1.15E-09 |
| LINC01307TGFB1  | 0.316126 | 9.99E-08 |
| LINC01317BIRC5  | 0.439658 | 2.78E-14 |
| LINC01317ZEB1   | -0.41443 | 1.03E-12 |
| LINC01317CXCL12 | -0.3885  | 3.13E-11 |
| LINC01317FGF2   | -0.38218 | 6.88E-11 |
| LINC01317FZD4   | -0.38183 | 7.18E-11 |
| LINC01317TWIST2 | -0.31293 | 1.36E-07 |
| LINC01317ZEB1   | -0.4176  | 6.64E-13 |
| LINC01317BIRC5  | 0.369273 | 3.26E-10 |

|           |        |          |          |
|-----------|--------|----------|----------|
| LINC01315 | CXCL12 | -0.35487 | 1.71E-09 |
| LINC01315 | FZD4   | -0.35344 | 2.01E-09 |
| LINC01315 | FGF2   | -0.32484 | 4.20E-08 |
| LINC01315 | TWIST2 | -0.30366 | 3.29E-07 |
| LINC01336 | CXCL12 | 0.479829 | ≤0.0001  |
| LINC01336 | BIRC5  | -0.50063 | ≤0.0001  |
| LINC01336 | EGF    | 0.590527 | ≤0.0001  |
| LINC01336 | ZEB1   | 0.354661 | 1.75E-09 |
| LINC01336 | FGF2   | 0.306227 | 2.58E-07 |
| LINC01340 | EGF    | 0.476681 | ≤0.0001  |
| LINC01340 | BIRC5  | -0.34402 | 5.66E-09 |
| LINC01340 | HIF1A  | 0.388216 | 3.24E-11 |
| LINC01352 | CXCL12 | 0.70737  | ≤0.0001  |
| LINC01352 | BIRC5  | -0.49437 | ≤0.0001  |
| LINC01352 | FZD4   | 0.571745 | ≤0.0001  |
| LINC01352 | FGF2   | 0.537634 | ≤0.0001  |
| LINC01352 | TWIST2 | 0.488226 | ≤0.0001  |
| LINC01352 | ZEB1   | 0.640947 | ≤0.0001  |
| LINC01352 | TWIST1 | 0.345891 | 4.62E-09 |
| LINC01354 | ZEB1   | 0.367997 | 3.79E-10 |
| LINC01354 | FZD4   | 0.360987 | 8.56E-10 |
| LINC01354 | CXCL12 | 0.329027 | 2.75E-08 |
| LINC01354 | FGF2   | 0.306516 | 2.52E-07 |
| LINC01354 | TWIST2 | 0.300689 | 4.33E-07 |
| LINC01356 | BIRC5  | 0.307574 | 2.28E-07 |
| LINC01356 | ZEB1   | 0.379321 | 9.76E-11 |
| LINC01356 | BIRC5  | -0.37544 | 1.56E-10 |
| LINC01356 | EGF    | 0.329337 | 2.66E-08 |
| LINC01356 | CXCL12 | 0.311437 | 1.57E-07 |
| LINC01366 | CXCL12 | 0.643947 | ≤0.0001  |
| LINC01366 | FZD4   | 0.701269 | ≤0.0001  |
| LINC01366 | FGF2   | 0.595437 | ≤0.0001  |
| LINC01366 | TWIST2 | 0.62184  | ≤0.0001  |
| LINC01366 | ZEB1   | 0.661882 | ≤0.0001  |
| LINC01366 | BIRC5  | -0.45406 | 3.11E-15 |
| LINC01366 | TWIST1 | 0.440281 | 2.53E-14 |
| LINC01381 | FZD4   | 0.570123 | ≤0.0001  |
| LINC01381 | ZEB1   | 0.535382 | ≤0.0001  |
| LINC01381 | TWIST2 | 0.466973 | 4.44E-16 |
| LINC01381 | FGF2   | 0.434167 | 6.24E-14 |
| LINC01381 | CXCL12 | 0.388831 | 3.00E-11 |
| LINC01381 | TWIST1 | 0.349632 | 3.07E-09 |
| LINC01381 | BIRC5  | -0.31009 | 1.79E-07 |
| LINC01395 | TWIST2 | 0.34781  | 3.75E-09 |
| LINC01395 | FZD4   | 0.346002 | 4.57E-09 |
| LINC01396 | ZEB1   | 0.337686 | 1.11E-08 |
| LINC01397 | TWIST1 | 0.33953  | 9.17E-09 |
| LINC01402 | CXCL12 | 0.529914 | ≤0.0001  |
| LINC01402 | BIRC5  | -0.48525 | ≤0.0001  |
| LINC01402 | FZD4   | 0.623664 | ≤0.0001  |
| LINC01402 | FGF2   | 0.553884 | ≤0.0001  |
| LINC01402 | TWIST2 | 0.474796 | ≤0.0001  |
| LINC01402 | ZEB1   | 0.597563 | ≤0.0001  |
| LINC01412 | CXCL12 | 0.586087 | ≤0.0001  |
| LINC01412 | TWIST2 | 0.492873 | ≤0.0001  |
| LINC01412 | ZEB1   | 0.468846 | 4.44E-16 |
| LINC01412 | BIRC5  | -0.45052 | 5.33E-15 |
| LINC01412 | FGF2   | 0.436479 | 4.44E-14 |

|           |        |          |          |
|-----------|--------|----------|----------|
| LINC01412 | FZD4   | 0.417538 | 6.70E-13 |
| LINC01412 | TWIST1 | 0.384532 | 5.14E-11 |
| LINC01415 | ZEB1   | 0.664657 | ≤0.0001  |
| LINC01415 | FZD4   | 0.468232 | 4.44E-16 |
| LINC01415 | TWIST2 | 0.399659 | 7.46E-12 |
| LINC01415 | FGF2   | 0.39857  | 8.60E-12 |
| LINC01415 | TWIST1 | 0.379056 | 1.01E-10 |
| LINC01415 | CXCL12 | 0.327515 | 3.20E-08 |
| LINC01415 | BIRC5  | -0.30123 | 4.12E-07 |
| LINC01422 | ZEB1   | 0.382994 | 6.22E-11 |
| LINC01422 | BIRC5  | -0.35483 | 1.72E-09 |
| LINC01423 | TGFB1  | 0.382109 | 6.94E-11 |
| LINC01426 | TGFB1  | 0.361659 | 7.92E-10 |
| LINC01435 | CDH2   | 0.319802 | 6.96E-08 |
| LINC01440 | ZEB1   | 0.311373 | 1.58E-07 |
| LINC01440 | FZD4   | 0.304852 | 2.94E-07 |
| LINC01443 | HIF1A  | 0.317437 | 8.79E-08 |
| LINC01456 | HIF1A  | 0.373824 | 1.90E-10 |
| LINC01471 | CDH2   | 0.310717 | 1.69E-07 |
| LINC01474 | CXCL12 | 0.660744 | ≤0.0001  |
| LINC01474 | BIRC5  | -0.51055 | ≤0.0001  |
| LINC01474 | FZD4   | 0.663412 | ≤0.0001  |
| LINC01474 | FGF2   | 0.646787 | ≤0.0001  |
| LINC01474 | TWIST2 | 0.509858 | ≤0.0001  |
| LINC01474 | ZEB1   | 0.661673 | ≤0.0001  |
| LINC01474 | TWIST1 | 0.32778  | 3.12E-08 |
| LINC01478 | CDH2   | 0.303241 | 3.42E-07 |
| LINC01484 | FZD4   | 0.749905 | ≤0.0001  |
| LINC01484 | FGF2   | 0.535526 | ≤0.0001  |
| LINC01484 | TWIST2 | 0.607295 | ≤0.0001  |
| LINC01484 | ZEB1   | 0.5808   | ≤0.0001  |
| LINC01484 | TWIST1 | 0.383117 | 6.12E-11 |
| LINC01484 | CXCL12 | 0.367661 | 3.95E-10 |
| LINC01485 | FZD4   | 0.757607 | ≤0.0001  |
| LINC01485 | FGF2   | 0.563176 | ≤0.0001  |
| LINC01485 | TWIST2 | 0.752436 | ≤0.0001  |
| LINC01485 | ZEB1   | 0.572858 | ≤0.0001  |
| LINC01485 | TWIST1 | 0.501342 | ≤0.0001  |
| LINC01485 | CXCL12 | 0.464076 | 6.66E-16 |
| LINC01485 | BIRC5  | -0.38175 | 7.25E-11 |
| LINC01504 | ZEB1   | 0.393966 | 1.56E-11 |
| LINC01504 | FZD4   | 0.357076 | 1.34E-09 |
| LINC01504 | TWIST2 | 0.324983 | 4.14E-08 |
| LINC01504 | CXCL12 | 0.306852 | 2.44E-07 |
| LINC01506 | TWIST2 | 0.42835  | 1.45E-13 |
| LINC01506 | CXCL12 | 0.345504 | 4.82E-09 |
| LINC01506 | ZEB1   | 0.32627  | 3.64E-08 |
| LINC01506 | TWIST1 | 0.311599 | 1.55E-07 |
| LINC01506 | FZD4   | 0.309208 | 1.95E-07 |
| LINC01508 | CXCL12 | -0.35563 | 1.57E-09 |
| LINC01508 | BIRC5  | 0.35138  | 2.53E-09 |
| LINC01508 | ZEB1   | -0.3499  | 2.98E-09 |
| LINC01515 | EGF    | 0.370127 | 2.95E-10 |
| LINC01523 | HIF1A  | 0.3683   | 3.66E-10 |
| LINC01524 | EGF    | 0.348361 | 3.53E-09 |
| LINC01527 | TGFB1  | 0.42623  | 1.97E-13 |
| LINC01532 | CXCL12 | 0.608818 | ≤0.0001  |
| LINC01532 | BIRC5  | -0.38231 | 6.77E-11 |

|                 |          |          |
|-----------------|----------|----------|
| LINC01537CXCL12 | 0.784902 | ≤0.0001  |
| LINC01537BIRC5  | -0.54549 | ≤0.0001  |
| LINC01537FZD4   | 0.837012 | ≤0.0001  |
| LINC01537FGF2   | 0.744134 | ≤0.0001  |
| LINC01537TWIST2 | 0.734829 | ≤0.0001  |
| LINC01537ZEB1   | 0.733182 | ≤0.0001  |
| LINC01537TWIST1 | 0.480257 | ≤0.0001  |
| LINC01537CXCR4  | -0.36008 | 9.50E-10 |
| LINC01547CDH2   | 0.306724 | 2.47E-07 |
| LINC01547FZD4   | -0.37041 | 2.85E-10 |
| LINC01547ZEB1   | -0.35769 | 1.25E-09 |
| LINC01547TWIST2 | -0.35582 | 1.54E-09 |
| LINC01547CXCL12 | -0.34789 | 3.72E-09 |
| LINC01547TWIST1 | -0.30175 | 3.93E-07 |
| LINC01557FGF2   | 0.476382 | ≤0.0001  |
| LINC01557BIRC5  | -0.45269 | 3.77E-15 |
| LINC01557FZD4   | 0.445908 | 1.07E-14 |
| LINC01557CXCL12 | 0.401876 | 5.58E-12 |
| LINC01557ZEB1   | 0.363273 | 6.58E-10 |
| LINC01557TWIST2 | 0.356013 | 1.51E-09 |
| LINC01557HIF1A  | 0.360535 | 9.01E-10 |
| LINC01567EGF    | 0.343038 | 6.30E-09 |
| LINC01567BIRC5  | -0.303   | 3.50E-07 |
| LINC01567CDH2   | 0.34516  | 5.01E-09 |
| LINC01567TWIST2 | -0.32754 | 3.20E-08 |
| LINC01567ZEB1   | -0.32066 | 6.39E-08 |
| LINC01567FZD4   | -0.31282 | 1.38E-07 |
| LINC01577CDH2   | 0.333961 | 1.65E-08 |
| LINC01577EGF    | 0.328189 | 2.99E-08 |
| LINC01577TGFB1  | 0.350631 | 2.75E-09 |
| LINC01587HIF1A  | 0.360802 | 8.74E-10 |
| LINC01587TGFB1  | 0.360818 | 8.73E-10 |
| LINC01587FZD4   | 0.649934 | ≤0.0001  |
| LINC01587FGF2   | 0.565172 | ≤0.0001  |
| LINC01587TWIST2 | 0.631722 | ≤0.0001  |
| LINC01587ZEB1   | 0.594306 | ≤0.0001  |
| LINC01587TWIST1 | 0.646725 | ≤0.0001  |
| LINC01587CXCL12 | 0.319484 | 7.18E-08 |
| LINC01587BIRC5  | -0.31737 | 8.84E-08 |
| LINC01587FGF2   | -0.36935 | 3.23E-10 |
| LINC01587FZD4   | -0.35304 | 2.10E-09 |
| LINC01587CXCL12 | -0.34933 | 3.17E-09 |
| LINC01587ZEB1   | -0.34635 | 4.40E-09 |
| LINC01587TWIST2 | -0.30768 | 2.25E-07 |
| LINC-PINTZEB1   | 0.345282 | 4.94E-09 |
| LINGO1-ACDH2    | 0.335926 | 1.34E-08 |
| LIPE-AS1 CXCL12 | 0.485908 | ≤0.0001  |
| LIPE-AS1 FZD4   | 0.788465 | ≤0.0001  |
| LIPE-AS1 FGF2   | 0.607929 | ≤0.0001  |
| LIPE-AS1 TWIST2 | 0.784505 | ≤0.0001  |
| LIPE-AS1 ZEB1   | 0.597262 | ≤0.0001  |
| LIPE-AS1 TWIST1 | 0.613113 | ≤0.0001  |
| LIPE-AS1 BIRC5  | -0.40106 | 6.21E-12 |
| LIPE-AS1 HIF1A  | -0.32646 | 3.57E-08 |
| LL22NC03 CXCL12 | -0.33711 | 1.18E-08 |
| LMF1-AS1 EGF    | 0.421014 | 4.13E-13 |
| LMO7DN-CXCL12   | 0.543711 | ≤0.0001  |
| LMO7DN-BIRC5    | -0.44995 | 5.77E-15 |

|                  |          |          |
|------------------|----------|----------|
| LMO7DN-ZEB1      | 0.392695 | 1.84E-11 |
| LMO7DN-EGF       | 0.373119 | 2.07E-10 |
| LMO7DN-FGF2      | 0.327651 | 3.16E-08 |
| LPP-AS2 BIRC5    | -0.5092  | ≤0.0001  |
| LPP-AS2 CXCL12   | 0.45208  | 4.22E-15 |
| LPP-AS2 FGF2     | 0.378655 | 1.06E-10 |
| LPP-AS2 EGF      | 0.361743 | 7.85E-10 |
| LPP-AS2 FZD4     | 0.31146  | 1.57E-07 |
| LPP-AS2 SNAI1    | -0.30596 | 2.65E-07 |
| LRP4-AS1 CDH2    | 0.343968 | 5.70E-09 |
| LRRC75A- CDH2    | 0.426025 | 2.03E-13 |
| LSINCT5 BIRC5    | -0.31884 | 7.65E-08 |
| LY86-AS1 FZD4    | 0.411104 | 1.62E-12 |
| LY86-AS1 ZEB1    | 0.335947 | 1.34E-08 |
| LY86-AS1 TWIST2  | 0.316275 | 9.85E-08 |
| LY86-AS1 FGF2    | 0.314666 | 1.15E-07 |
| MAFA-AS: TGFB1   | 0.494629 | ≤0.0001  |
| MAGI1-AS:CDH2    | 0.342961 | 6.35E-09 |
| MAGI1-IT:CDH2    | 0.309415 | 1.91E-07 |
| MAGI2-AS:CDH2    | 0.353388 | 2.02E-09 |
| MAGI2-AS: CXCL12 | 0.799055 | ≤0.0001  |
| MAGI2-AS: BIRC5  | -0.64166 | ≤0.0001  |
| MAGI2-AS: FZD4   | 0.812518 | ≤0.0001  |
| MAGI2-AS: FGF2   | 0.81452  | ≤0.0001  |
| MAGI2-AS: TWIST2 | 0.666475 | ≤0.0001  |
| MAGI2-AS: ZEB1   | 0.827094 | ≤0.0001  |
| MAGI2-AS: TWIST1 | 0.509936 | ≤0.0001  |
| MAGI2-AS: CXCR4  | -0.36689 | 4.32E-10 |
| MAN2C1 BIRC5     | -0.39956 | 7.56E-12 |
| MAN2C1 CXCL12    | 0.348639 | 3.42E-09 |
| MAN2C1 ZEB1      | 0.327719 | 3.14E-08 |
| MAN2C1 FGF2      | 0.30108  | 4.18E-07 |
| MAP3K14- TWIST2  | -0.32789 | 3.08E-08 |
| MAP3K14- TWIST1  | -0.31143 | 1.58E-07 |
| MAP3K14- FZD4    | -0.30013 | 4.56E-07 |
| MAPKAPK ZEB1     | -0.39289 | 1.79E-11 |
| MAST4-AS: BIRC5  | -0.44329 | 1.60E-14 |
| MAST4-AS: CXCL12 | 0.393083 | 1.75E-11 |
| MAST4-AS: EGF    | 0.305653 | 2.73E-07 |
| MATN1- A FZD4    | -0.30138 | 4.07E-07 |
| MBNL1- A: ZEB1   | 0.478132 | ≤0.0001  |
| MBNL1- A: FGF2   | 0.43659  | 4.37E-14 |
| MBNL1- A: FZD4   | 0.432872 | 7.55E-14 |
| MBNL1- A: TWIST2 | 0.341203 | 7.67E-09 |
| MBNL1- A: CXCL12 | 0.336813 | 1.22E-08 |
| MCF2L-AS: ZEB1   | -0.3872  | 3.68E-11 |
| MCF2L-AS: FZD4   | -0.32526 | 4.03E-08 |
| MCF2L-AS: BIRC5  | 0.319421 | 7.22E-08 |
| MCF2L-AS: TWIST2 | -0.31265 | 1.40E-07 |
| MCF2L-AS: CXCL12 | -0.30276 | 3.58E-07 |
| MCHR2- A TGFB1   | 0.353967 | 1.90E-09 |
| MCM8- AS: CDH2   | 0.307718 | 2.24E-07 |
| MED14OS TGFB1    | 0.413836 | 1.12E-12 |
| MEF2C-AS: CXCL12 | 0.539741 | ≤0.0001  |
| MEF2C-AS: BIRC5  | -0.51886 | ≤0.0001  |
| MEF2C-AS: ZEB1   | 0.5356   | ≤0.0001  |
| MEF2C-AS: FGF2   | 0.437356 | 3.91E-14 |
| MEF2C-AS: EGF    | 0.357718 | 1.24E-09 |

|                 |          |          |
|-----------------|----------|----------|
| MEF2C-AS:FZD4   | 0.349138 | 3.24E-09 |
| MEF2C-AS:TWIST2 | 0.330277 | 2.41E-08 |
| MEF2C-AS:SNAI1  | -0.31831 | 8.06E-08 |
| MEF2C-AS:TWIST1 | 0.308403 | 2.10E-07 |
| MEG3 CDH2       | 0.327742 | 3.13E-08 |
| MEG3 ZEB1       | 0.318743 | 7.72E-08 |
| MEG8 CDH2       | 0.352356 | 2.27E-09 |
| MEG9 BIRC5      | -0.38525 | 4.70E-11 |
| MEG9 ZEB1       | 0.378255 | 1.11E-10 |
| MEG9 CXCL12     | 0.317393 | 8.82E-08 |
| MEIS1-AS:CDH2   | 0.354885 | 1.71E-09 |
| MEIS1-AS:ZEB1   | 0.304544 | 3.03E-07 |
| MEIS1-AS:CDH2   | 0.411356 | 1.57E-12 |
| MESTIT1 FZD4    | 0.723506 | ≤0.0001  |
| MESTIT1 FGF2    | 0.577464 | ≤0.0001  |
| MESTIT1 TWIST2  | 0.572322 | ≤0.0001  |
| MESTIT1 ZEB1    | 0.633806 | ≤0.0001  |
| MESTIT1 CXCL12  | 0.450776 | 5.11E-15 |
| MESTIT1 BIRC5   | -0.38609 | 4.23E-11 |
| MESTIT1 TWIST1  | 0.345204 | 4.98E-09 |
| MGAT3-A:FGF2    | 0.399696 | 7.43E-12 |
| MGAT3-A:ZEB1    | 0.35867  | 1.12E-09 |
| MGAT3-A:FZD4    | 0.352804 | 2.16E-09 |
| MGC1588:ZEB1    | 0.33489  | 1.50E-08 |
| MIAT CXCR4      | 0.345685 | 4.73E-09 |
| MIAT TGFB1      | 0.336271 | 1.29E-08 |
| MID1IP1-:FZD4   | 0.493624 | ≤0.0001  |
| MID1IP1-:ZEB1   | 0.486754 | ≤0.0001  |
| MID1IP1-:TWIST2 | 0.450397 | 5.33E-15 |
| MID1IP1-:TWIST1 | 0.405705 | 3.36E-12 |
| MID1IP1-:FGF2   | 0.395516 | 1.28E-11 |
| MIMT1 BIRC5     | 0.354119 | 1.86E-09 |
| MIR100HG CXCL12 | 0.584484 | ≤0.0001  |
| MIR100HGBIRC5   | -0.54358 | ≤0.0001  |
| MIR100HGBIRC5   | 0.505049 | ≤0.0001  |
| MIR100HGFZD4    | 0.376394 | 1.39E-10 |
| MIR124-2ITGFB1  | 0.473784 | ≤0.0001  |
| MIR137HGCCDH2   | 0.361994 | 7.62E-10 |
| MIR155HGCCXCR4  | 0.378366 | 1.10E-10 |
| MIR155HGFZD4    | -0.32908 | 2.73E-08 |
| MIR155HGBIRC5   | 0.323422 | 4.85E-08 |
| MIR155HGTGFB1   | 0.321186 | 6.06E-08 |
| MIR155HGCXCL12  | -0.31937 | 7.26E-08 |
| MIR155HGFZD4    | -0.3119  | 1.51E-07 |
| MIR17HG CDH2    | 0.304245 | 3.11E-07 |
| MIR181A1 CDH2   | 0.328713 | 2.84E-08 |
| MIR202HGCXCL12  | 0.49944  | ≤0.0001  |
| MIR202HGBIRC5   | -0.3354  | 1.42E-08 |
| MIR205HCEGF     | 0.403263 | 4.64E-12 |
| MIR205HGBIRC5   | -0.38733 | 3.62E-11 |
| MIR205HGCXCL12  | 0.325709 | 3.85E-08 |
| MIR210HGCXCL12  | -0.40664 | 2.96E-12 |
| MIR210HGBIRC5   | -0.34701 | 4.09E-09 |
| MIR210HGFZD4    | -0.3365  | 1.26E-08 |
| MIR210HGCXCL12  | -0.30885 | 2.02E-07 |
| MIR22HG CXCL12  | 0.721803 | ≤0.0001  |
| MIR22HG BIRC5   | -0.5524  | ≤0.0001  |
| MIR22HG FZD4    | 0.738353 | ≤0.0001  |



|          |        |          |          |
|----------|--------|----------|----------|
| MIR22HG  | FGF2   | 0.707009 | ≤0.0001  |
| MIR22HG  | TWIST2 | 0.713225 | ≤0.0001  |
| MIR22HG  | ZEB1   | 0.705149 | ≤0.0001  |
| MIR22HG  | TWIST1 | 0.413861 | 1.11E-12 |
| MIR22HG  | CXCR4  | -0.33991 | 8.80E-09 |
| MIR31HG  | HIF1A  | 0.37363  | 1.94E-10 |
| MIR381HG | CDH2   | 0.35033  | 2.84E-09 |
| MIR4697H | CXCL12 | 0.494697 | ≤0.0001  |
| MIR4697H | BIRC5  | -0.49112 | ≤0.0001  |
| MIR4697H | EGF    | 0.354594 | 1.77E-09 |
| MIR497HG | CXCL12 | 0.652665 | ≤0.0001  |
| MIR497HG | BIRC5  | -0.58621 | ≤0.0001  |
| MIR497HG | FZD4   | 0.515844 | ≤0.0001  |
| MIR497HG | FGF2   | 0.473517 | ≤0.0001  |
| MIR497HG | TWIST2 | 0.572417 | ≤0.0001  |
| MIR497HG | TWIST1 | 0.426798 | 1.82E-13 |
| MIR497HG | HIF1A  | -0.40904 | 2.15E-12 |
| MIR497HG | ZEB1   | 0.408533 | 2.30E-12 |
| MIR497HG | CXCR4  | -0.34224 | 6.86E-09 |
| MIR503HG | TGFB1  | 0.580129 | ≤0.0001  |
| MIR762HG | CXCL12 | -0.42685 | 1.80E-13 |
| MIR762HG | FZD4   | -0.41577 | 8.56E-13 |
| MIR762HG | FGF2   | -0.3973  | 1.01E-11 |
| MIR762HG | ZEB1   | -0.38915 | 2.88E-11 |
| MIR762HG | BIRC5  | 0.362632 | 7.08E-10 |
| MIR762HG | TWIST2 | -0.35262 | 2.20E-09 |
| MIR99AH  | CXCL12 | 0.553262 | ≤0.0001  |
| MIR99AH  | BIRC5  | -0.5424  | ≤0.0001  |
| MIR99AH  | FGF2   | 0.482751 | ≤0.0001  |
| MIR99AH  | ZEB1   | 0.549072 | ≤0.0001  |
| MIR99AH  | FZD4   | 0.456063 | 2.22E-15 |
| MIR99AH  | TWIST2 | 0.374398 | 1.77E-10 |
| MIR99AH  | EGF    | 0.353112 | 2.09E-09 |
| MIR99AH  | CXCR4  | -0.30867 | 2.05E-07 |
| MKLN1-AS | BIRC5  | -0.40202 | 5.47E-12 |
| MKLN1-AS | CXCL12 | 0.328798 | 2.81E-08 |
| MKLN1-AS | EGF    | 0.316115 | 1.00E-07 |
| MKLN1-AS | ZEB1   | 0.300113 | 4.57E-07 |
| MX-AS1   | CDH2   | 0.351199 | 2.58E-09 |
| MX-AS1   | EGF    | 0.448641 | 7.11E-15 |
| MX-AS1   | BIRC5  | -0.43271 | 7.73E-14 |
| MX-AS1   | CXCL12 | 0.414941 | 9.60E-13 |
| MX-AS1   | ZEB1   | 0.389746 | 2.67E-11 |
| MX-AS1   | FGF2   | 0.323148 | 4.98E-08 |
| MMP25-A  | FZD4   | -0.36819 | 3.71E-10 |
| MMP25-A  | TWIST2 | -0.33781 | 1.10E-08 |
| MX1-AS   | BIRC5  | 0.373769 | 1.91E-10 |
| MX1-AS   | CXCL12 | -0.36233 | 7.33E-10 |
| MX1-AS   | ZEB1   | -0.33759 | 1.13E-08 |
| MORF4L2  | EGF    | 0.397612 | 9.74E-12 |
| MPRI-AS  | CDH2   | 0.345901 | 4.62E-09 |
| MRGPRF-/ | CXCL12 | 0.623244 | ≤0.0001  |
| MRGPRF-/ | BIRC5  | -0.54559 | ≤0.0001  |
| MRGPRF-/ | FZD4   | 0.532134 | ≤0.0001  |
| MRGPRF-/ | FGF2   | 0.491427 | ≤0.0001  |
| MRGPRF-/ | TWIST2 | 0.510756 | ≤0.0001  |
| MRGPRF-/ | ZEB1   | 0.504599 | ≤0.0001  |
| MRGPRF-/ | TWIST1 | 0.336246 | 1.30E-08 |

|                 |          |          |
|-----------------|----------|----------|
| MRGPRF-/CXCR4   | -0.30828 | 2.13E-07 |
| MTHFS BIRC5     | 0.324911 | 4.17E-08 |
| MYB-AS1 EGF     | 0.3104   | 1.74E-07 |
| MYCBP2-/ZEB1    | 0.324216 | 4.48E-08 |
| MYCNOS CXCL12   | -0.30343 | 3.36E-07 |
| MYLK-AS1CXCL12  | -0.33334 | 1.76E-08 |
| MYLK-AS1BIRC5   | 0.331114 | 2.21E-08 |
| MYO16-A'CDH2    | 0.367967 | 3.81E-10 |
| N4BP2L2- ZEB1   | 0.32246  | 5.34E-08 |
| NAALADL'CDH2    | 0.31027  | 1.76E-07 |
| NADK2-A'ZEB1    | 0.403647 | 4.41E-12 |
| NALCN-A'HIF1A   | 0.307119 | 2.38E-07 |
| NARF-IT1 CDH2   | 0.326227 | 3.65E-08 |
| NARF-IT1 ZEB1   | 0.300195 | 4.54E-07 |
| NCAM1-A CDH2    | 0.300326 | 4.48E-07 |
| NCBP2-AS CXCL12 | -0.5068  | ≤0.0001  |
| NCBP2-AS BIRC5  | 0.578551 | ≤0.0001  |
| NCBP2-AS ZEB1   | -0.5712  | ≤0.0001  |
| NCBP2-AS FGF2   | -0.45638 | 2.22E-15 |
| NCBP2-AS FZD4   | -0.43155 | 9.15E-14 |
| NCBP2-AS TWIST2 | -0.31024 | 1.77E-07 |
| NDUFB2-/ZEB1    | -0.46025 | 1.11E-15 |
| NDUFB2-/CXCL12  | -0.43551 | 5.11E-14 |
| NDUFB2-/FZD4    | -0.42007 | 4.71E-13 |
| NDUFB2-/FGF2    | -0.40221 | 5.34E-12 |
| NDUFB2-/TWIST2  | -0.38086 | 8.09E-11 |
| NDUFB2-/BIRC5   | 0.32126  | 6.02E-08 |
| NDUFB2-/TWIST1  | -0.3139  | 1.24E-07 |
| NEBL-AS1 ZEB1   | -0.30287 | 3.54E-07 |
| NEXN-AS1ZEB1    | 0.486436 | ≤0.0001  |
| NFIA-AS1 CDH2   | 0.346324 | 4.41E-09 |
| NFYC-AS1 TWIST2 | -0.30331 | 3.40E-07 |
| NIFK-AS1 CXCL12 | 0.463821 | 6.66E-16 |
| NIFK-AS1 FGF2   | 0.378649 | 1.06E-10 |
| NIFK-AS1 HIF1A  | -0.37357 | 1.96E-10 |
| NIFK-AS1 BIRC5  | -0.34302 | 6.31E-09 |
| NLGN1-A'CDH2    | 0.354258 | 1.84E-09 |
| NOP14-A'BIRC5   | -0.37111 | 2.63E-10 |
| NPTN-IT1 ZEB1   | 0.404707 | 3.83E-12 |
| NR2F1-AS CXCL12 | 0.656887 | ≤0.0001  |
| NR2F1-AS BIRC5  | -0.52808 | ≤0.0001  |
| NR2F1-AS FZD4   | 0.557315 | ≤0.0001  |
| NR2F1-AS FGF2   | 0.499327 | ≤0.0001  |
| NR2F1-AS ZEB1   | 0.659608 | ≤0.0001  |
| NR2F1-AS TWIST1 | 0.516724 | ≤0.0001  |
| NR2F1-AS TWIST2 | 0.458109 | 1.78E-15 |
| NR2F2-AS ZEB1   | 0.442007 | 1.95E-14 |
| NR2F2-AS BIRC5  | -0.30069 | 4.33E-07 |
| NRG1-IT1 CDH2   | 0.352156 | 2.32E-09 |
| NRG1-IT3 CDH2   | 0.349933 | 2.97E-09 |
| NRG3-AS1CDH2    | 0.354118 | 1.86E-09 |
| OGFRP1 CXCL12   | -0.34147 | 7.45E-09 |
| OGFRP1 FZD4     | -0.31799 | 8.32E-08 |
| OIP5-AS1 CXCL12 | 0.552487 | ≤0.0001  |
| OIP5-AS1 BIRC5  | -0.49396 | ≤0.0001  |
| OIP5-AS1 FZD4   | 0.485846 | ≤0.0001  |
| OIP5-AS1 FGF2   | 0.558273 | ≤0.0001  |
| OIP5-AS1 ZEB1   | 0.593765 | ≤0.0001  |

|                         |          |               |
|-------------------------|----------|---------------|
| OIP5-AS1 EGF            | 0.372804 | 2.15E-10      |
| OIP5-AS1 SNAI1          | -0.3459  | 4.62E-09      |
| OIP5-AS1 TGFB1          | -0.34529 | 4.94E-09      |
| OR2A1-A $\zeta$ EGF     | 0.397594 | 9.77E-12      |
| OR2A1-A $\zeta$ BIRC5   | -0.39286 | 1.80E-11      |
| OR2A1-A $\zeta$ CXCL12  | 0.367755 | 3.90E-10      |
| OXCT1-A $\zeta$ CXCL12  | 0.485085 | $\leq 0.0001$ |
| OXCT1-A $\zeta$ FZD4    | 0.683691 | $\leq 0.0001$ |
| OXCT1-A $\zeta$ FGF2    | 0.670004 | $\leq 0.0001$ |
| OXCT1-A $\zeta$ TWIST2  | 0.627756 | $\leq 0.0001$ |
| OXCT1-A $\zeta$ ZEB1    | 0.524331 | $\leq 0.0001$ |
| OXCT1-A $\zeta$ TWIST1  | 0.499776 | $\leq 0.0001$ |
| OXCT1-A $\zeta$ BIRC5   | -0.41569 | 8.66E-13      |
| OXCT1-A $\zeta$ SNAI1   | -0.3274  | 3.24E-08      |
| OXCT1-A $\zeta$ CXCR4   | -0.30204 | 3.82E-07      |
| P4HA2-AS BIRC5          | -0.31982 | 6.94E-08      |
| PABPC5-A ZEB1           | 0.408788 | 2.22E-12      |
| PAQR9-A $\zeta$ CDH2    | 0.3971   | 1.04E-11      |
| PAQR9-A $\zeta$ ZEB1    | 0.307881 | 2.21E-07      |
| PARD3-A $\zeta$ EGF     | 0.346084 | 4.53E-09      |
| PART1 ZEB1              | -0.33542 | 1.42E-08      |
| PART1 FZD4              | -0.32611 | 3.70E-08      |
| PART1 TWIST2            | -0.31516 | 1.10E-07      |
| PAXBP1-A ZEB1           | 0.389725 | 2.68E-11      |
| PAXBP1-A BIRC5          | -0.3035  | 3.34E-07      |
| PAXIP1-A $\zeta$ ZEB1   | -0.3516  | 2.47E-09      |
| PAXIP1-A $\zeta$ CXCL12 | 0.671521 | $\leq 0.0001$ |
| PAXIP1-A $\zeta$ BIRC5  | -0.62387 | $\leq 0.0001$ |
| PAXIP1-A $\zeta$ FGF2   | 0.543329 | $\leq 0.0001$ |
| PAXIP1-A $\zeta$ EGF    | 0.509931 | $\leq 0.0001$ |
| PAXIP1-A $\zeta$ ZEB1   | 0.536679 | $\leq 0.0001$ |
| PAXIP1-A $\zeta$ FZD4   | 0.446267 | 1.02E-14      |
| PAXIP1-A $\zeta$ SNAI1  | -0.33947 | 9.22E-09      |
| PAXIP1-A $\zeta$ TWIST2 | 0.302098 | 3.80E-07      |
| PCAT19 CXCL12           | 0.569474 | $\leq 0.0001$ |
| PCAT19 FZD4             | 0.509722 | $\leq 0.0001$ |
| PCAT19 TWIST2           | 0.507894 | $\leq 0.0001$ |
| PCAT19 ZEB1             | 0.444098 | 1.42E-14      |
| PCAT19 FGF2             | 0.404048 | 4.19E-12      |
| PCAT19 BIRC5            | -0.38536 | 4.63E-11      |
| PCAT19 TWIST1           | 0.317127 | 9.06E-08      |
| PCAT4 ZEB1              | 0.408651 | 2.26E-12      |
| PCAT6 CXCL12            | -0.46266 | 8.88E-16      |
| PCAT6 ZEB1              | -0.43598 | 4.80E-14      |
| PCAT6 FZD4              | -0.36531 | 5.19E-10      |
| PCAT6 FGF2              | -0.35876 | 1.10E-09      |
| PCAT6 BIRC5             | 0.354554 | 1.78E-09      |
| PCAT6 TWIST2            | -0.32181 | 5.69E-08      |
| PCAT7 CXCL12            | -0.3351  | 1.46E-08      |
| PCAT7 CDH2              | 0.301551 | 4.00E-07      |
| PCBP1-AS CDH2           | 0.34468  | 5.27E-09      |
| PCBP1-AS ZEB1           | 0.330006 | 2.48E-08      |
| PCDH9-A $\zeta$ CDH2    | 0.344265 | 5.52E-09      |
| PCDH9-A $\zeta$ CDH2    | 0.349471 | 3.12E-09      |
| PCED1B-ATGFB1           | 0.410676 | 1.72E-12      |
| PCED1B-ACXCR4           | 0.370831 | 2.71E-10      |
| PDZRN3- $\neg$ ZEB1     | 0.346119 | 4.51E-09      |
| PDZRN3- $\neg$ CDH2     | 0.332981 | 1.83E-08      |

|                 |          |          |
|-----------------|----------|----------|
| PEX5L-AS:CDH2   | 0.380808 | 8.14E-11 |
| PEX5L-AS:CDH2   | 0.397507 | 9.88E-12 |
| PGM5-AS: CXCL12 | 0.799087 | ≤0.0001  |
| PGM5-AS: BIRC5  | -0.56475 | ≤0.0001  |
| PGM5-AS: FZD4   | 0.733072 | ≤0.0001  |
| PGM5-AS: FGF2   | 0.667451 | ≤0.0001  |
| PGM5-AS: TWIST2 | 0.71236  | ≤0.0001  |
| PGM5-AS: ZEB1   | 0.700356 | ≤0.0001  |
| PGM5-AS: TWIST1 | 0.483992 | ≤0.0001  |
| PGM5-AS: CXCR4  | -0.34948 | 3.12E-09 |
| PGM5-AS: HIF1A  | -0.31932 | 7.29E-08 |
| PGM5P2 ZEB1     | 0.374475 | 1.76E-10 |
| PGM5P3-/CXCL12  | 0.59681  | ≤0.0001  |
| PGM5P3-/BIRC5   | -0.4735  | ≤0.0001  |
| PGM5P3-/FZD4    | 0.730871 | ≤0.0001  |
| PGM5P3-/FGF2    | 0.704257 | ≤0.0001  |
| PGM5P3-/TWIST2  | 0.672992 | ≤0.0001  |
| PGM5P3-/ZEB1    | 0.622593 | ≤0.0001  |
| PGM5P3-/TWIST1  | 0.553318 | ≤0.0001  |
| PGM5P3-/CXCR4   | -0.30372 | 3.27E-07 |
| PGM5P4-/CXCL12  | 0.544813 | ≤0.0001  |
| PGM5P4-/FZD4    | 0.644764 | ≤0.0001  |
| PGM5P4-/FGF2    | 0.653595 | ≤0.0001  |
| PGM5P4-/TWIST2  | 0.618274 | ≤0.0001  |
| PGM5P4-/ZEB1    | 0.55024  | ≤0.0001  |
| PGM5P4-/TWIST1  | 0.545075 | ≤0.0001  |
| PGM5P4-/BIRC5   | -0.41659 | 7.65E-13 |
| PHEx-AS1 EGF    | 0.433967 | 6.44E-14 |
| PHKA2-AS TWIST1 | 0.30136  | 4.07E-07 |
| PIK3CD-A ZEB1   | -0.33941 | 9.29E-09 |
| PIK3CD-A FZD4   | -0.31281 | 1.38E-07 |
| PINK1-AS EGF    | 0.361732 | 7.86E-10 |
| PITPNA-A HIF1A  | -0.36178 | 7.81E-10 |
| PLBD1-AS ZEB1   | 0.33004  | 2.47E-08 |
| PLBD1-AS FGF2   | 0.300906 | 4.25E-07 |
| PLCE1-AS:CDH2   | 0.321115 | 6.11E-08 |
| PLCE1-AS:CDH2   | 0.323093 | 5.01E-08 |
| PLCG1-AS ZEB1   | 0.331541 | 2.12E-08 |
| PLCG1-AS CDH2   | 0.30149  | 4.02E-07 |
| POU6F2-A CDH2   | 0.310085 | 1.79E-07 |
| PP7080 ZEB1     | -0.45391 | 3.11E-15 |
| PP7080 FZD4     | -0.40985 | 1.92E-12 |
| PP7080 CXCL12   | -0.34585 | 4.64E-09 |
| PP7080 BIRC5    | 0.336405 | 1.28E-08 |
| PP7080 TWIST2   | -0.32567 | 3.86E-08 |
| PP7080 TWIST1   | -0.31504 | 1.11E-07 |
| PP7080 FGF2     | -0.30163 | 3.97E-07 |
| PPEF1-AS:CDH2   | 0.305726 | 2.71E-07 |
| PPP3CB-A BIRC5  | -0.50994 | ≤0.0001  |
| PPP3CB-A CXCL12 | 0.445936 | 1.07E-14 |
| PPP3CB-A EGF    | 0.422489 | 3.35E-13 |
| PPP3CB-A ZEB1   | 0.306737 | 2.46E-07 |
| PRICKLE2-ZEB1   | 0.460972 | 8.88E-16 |
| PRICKLE2-ZEB1   | 0.343625 | 5.91E-09 |
| PRKAR2A-BIRC5   | -0.39189 | 2.03E-11 |
| PRKCQ-A FZD4    | -0.3072  | 2.36E-07 |
| PROX1-A CXCL12  | 0.334301 | 1.59E-08 |
| PRSS51 EGF      | 0.333113 | 1.80E-08 |

|                 |          |          |
|-----------------|----------|----------|
| PSMA3-A: CXCL12 | 0.474965 | ≤0.0001  |
| PSMA3-A: BIRC5  | -0.4949  | ≤0.0001  |
| PSMA3-A: EGF    | 0.479206 | ≤0.0001  |
| PSMB8-A: TGFB1  | 0.341261 | 7.62E-09 |
| PSMD6-A: ZEB1   | 0.360098 | 9.48E-10 |
| PSMG3-A: CXCL12 | 0.510804 | ≤0.0001  |
| PSMG3-A: BIRC5  | -0.45048 | 5.33E-15 |
| PSMG3-A: FZD4   | 0.426168 | 1.99E-13 |
| PSMG3-A: FGF2   | 0.387838 | 3.40E-11 |
| PSMG3-A: ZEB1   | 0.381052 | 7.90E-11 |
| PSMG3-A: EGF    | 0.3146   | 1.16E-07 |
| PSMG3-A: TWIST2 | 0.310892 | 1.66E-07 |
| PSORS1C3PDGFB   | 0.37398  | 1.86E-10 |
| PTENP1-A FZD4   | 0.647346 | ≤0.0001  |
| PTENP1-A FGF2   | 0.647484 | ≤0.0001  |
| PTENP1-A TWIST2 | 0.606268 | ≤0.0001  |
| PTENP1-A ZEB1   | 0.593862 | ≤0.0001  |
| PTENP1-A TWIST1 | 0.517021 | ≤0.0001  |
| PTENP1-A CXCL12 | 0.462531 | 8.88E-16 |
| PTENP1-A BIRC5  | -0.42497 | 2.36E-13 |
| PTOV1-A: FZD4   | -0.39659 | 1.11E-11 |
| PTOV1-A: TWIST2 | -0.37054 | 2.81E-10 |
| PTOV1-A: CXCL12 | -0.31244 | 1.43E-07 |
| PTOV1-A: FGF2   | -0.31119 | 1.61E-07 |
| PTPRD-A: ZEB1   | 0.408486 | 2.31E-12 |
| PTPRD-A: CXCL12 | 0.392096 | 1.98E-11 |
| PTPRG-A: FZD4   | -0.3082  | 2.15E-07 |
| PWAR5 ZEB1      | 0.402045 | 5.45E-12 |
| PWAR6 CXCL12    | 0.499639 | ≤0.0001  |
| PWAR6 BIRC5     | -0.51965 | ≤0.0001  |
| PWAR6 EGF       | 0.503893 | ≤0.0001  |
| PWAR6 ZEB1      | 0.454208 | 3.11E-15 |
| PWAR6 FGF2      | 0.367577 | 3.98E-10 |
| PYCARD- / ZEB1  | -0.30931 | 1.93E-07 |
| RAB11B-A TWIST1 | 0.333534 | 1.72E-08 |
| RAB11B-A TWIST2 | 0.331702 | 2.08E-08 |
| RAB11B-A HIF1A  | -0.30304 | 3.48E-07 |
| RAD51-A: BIRC5  | -0.5109  | ≤0.0001  |
| RAD51-A: EGF    | 0.565201 | ≤0.0001  |
| RAD51-A: CXCL12 | 0.426068 | 2.02E-13 |
| RAD51-A: SNAI1  | -0.30258 | 3.64E-07 |
| RAMP2-A: CXCL12 | 0.578789 | ≤0.0001  |
| RAMP2-A: FZD4   | 0.71435  | ≤0.0001  |
| RAMP2-A: FGF2   | 0.696471 | ≤0.0001  |
| RAMP2-A: TWIST2 | 0.62432  | ≤0.0001  |
| RAMP2-A: ZEB1   | 0.665232 | ≤0.0001  |
| RAMP2-A: TWIST1 | 0.569942 | ≤0.0001  |
| RAMP2-A: BIRC5  | -0.46539 | 4.44E-16 |
| RAMP2-A: CXCR4  | -0.30109 | 4.18E-07 |
| RAP2C-A: ZEB1   | 0.380544 | 8.41E-11 |
| RAP2C-A: BIRC5  | -0.33451 | 1.56E-08 |
| RAPGEF4- ZEB1   | 0.476089 | ≤0.0001  |
| RARA-AS1CXCL12  | 0.311027 | 1.64E-07 |
| RARA-AS1BIRC5   | -0.30943 | 1.91E-07 |
| RASGRF2- CXCL12 | 0.605416 | ≤0.0001  |
| RASGRF2- FZD4   | 0.7458   | ≤0.0001  |
| RASGRF2- FGF2   | 0.628523 | ≤0.0001  |
| RASGRF2- TWIST2 | 0.601933 | ≤0.0001  |

|                 |          |          |
|-----------------|----------|----------|
| RASGRF2-ZEB1    | 0.689851 | ≤0.0001  |
| RASGRF2-BIRC5   | -0.46947 | 2.22E-16 |
| RASGRF2-TWIST1  | 0.452755 | 3.77E-15 |
| RASGRF2-CXCR4   | -0.30324 | 3.42E-07 |
| RASSF8-A-ZEB1   | 0.429697 | 1.20E-13 |
| RASSF8-A-CXCL12 | 0.323859 | 4.64E-08 |
| RBAKDN-TGFB1    | 0.361561 | 8.01E-10 |
| RBM26-A-EGF     | 0.38744  | 3.57E-11 |
| RBM26-A-BIRC5   | -0.37693 | 1.31E-10 |
| RBM26-A-FGF2    | 0.376039 | 1.45E-10 |
| RBM26-A-CXCL12  | 0.351149 | 2.60E-09 |
| RBM26-A-SNAI1   | -0.34209 | 6.97E-09 |
| RBM26-A-TGFB1   | -0.32847 | 2.91E-08 |
| RBM26-A-ZEB1    | 0.32515  | 4.07E-08 |
| RBM5-AS1-ZEB1   | 0.402914 | 4.86E-12 |
| RBM5-AS1-BIRC5  | -0.31549 | 1.06E-07 |
| RBMS3-A-CDH2    | 0.347227 | 4.00E-09 |
| RBMS3-A-CDH2    | 0.348873 | 3.34E-09 |
| RBMS3-A-CXCL12  | 0.547601 | ≤0.0001  |
| RBMS3-A-BIRC5   | -0.52648 | ≤0.0001  |
| RBMS3-A-FZD4    | 0.543168 | ≤0.0001  |
| RBMS3-A-FGF2    | 0.539724 | ≤0.0001  |
| RBMS3-A-TWIST2  | 0.519066 | ≤0.0001  |
| RBMS3-A-ZEB1    | 0.619232 | ≤0.0001  |
| RBMS3-A-TWIST1  | 0.472454 | ≤0.0001  |
| RBMS3-A-CXCR4   | -0.31754 | 8.70E-08 |
| RPMS-A-FZD4     | 0.709686 | ≤0.0001  |
| RPMS-A-FGF2     | 0.606897 | ≤0.0001  |
| RPMS-A-TWIST2   | 0.660077 | ≤0.0001  |
| RPMS-A-ZEB1     | 0.529616 | ≤0.0001  |
| RPMS-A-TWIST1   | 0.618324 | ≤0.0001  |
| RPMS-A-CXCL12   | 0.445024 | 1.24E-14 |
| RPMS-A-BIRC5    | -0.41311 | 1.23E-12 |
| RERG-IT1-EGF    | 0.481723 | ≤0.0001  |
| RERG-IT1-BIRC5  | -0.45392 | 3.11E-15 |
| RERG-IT1-CXCL12 | 0.42599  | 2.04E-13 |
| RGS5-CXCL12     | 0.547646 | ≤0.0001  |
| RGS5-FZD4       | 0.583288 | ≤0.0001  |
| RGS5-FGF2       | 0.508998 | ≤0.0001  |
| RGS5-ZEB1       | 0.637932 | ≤0.0001  |
| RGS5-BIRC5      | -0.46047 | 1.11E-15 |
| RGS5-TWIST2     | 0.417293 | 6.93E-13 |
| RGS5-TWIST1     | 0.327505 | 3.21E-08 |
| RHOA-IT1-ZEB1   | 0.30201  | 3.83E-07 |
| RHPN1-A-CXCL12  | -0.50531 | ≤0.0001  |
| RHPN1-A-BIRC5   | 0.494397 | ≤0.0001  |
| RHPN1-A-ZEB1    | -0.4714  | 2.22E-16 |
| RHPN1-A-FZD4    | -0.43529 | 5.28E-14 |
| RHPN1-A-TWIST2  | -0.42801 | 1.53E-13 |
| RHPN1-A-FGF2    | -0.3398  | 8.91E-09 |
| RHPN1-A-TWIST1  | -0.32175 | 5.73E-08 |
| RMST-EGF        | 0.337391 | 1.15E-08 |
| RNASEH1-BIRC5   | 0.514877 | ≤0.0001  |
| RNASEH1-ZEB1    | -0.43579 | 4.93E-14 |
| RNASEH1-CXCL12  | -0.38222 | 6.84E-11 |
| RNASEH1-FGF2    | -0.36262 | 7.09E-10 |
| RNASEH1-FZD4    | -0.32725 | 3.29E-08 |
| RNASEH1-TWIST2  | -0.302   | 3.84E-07 |

|                  |          |          |
|------------------|----------|----------|
| RNF139-A CXCL12  | -0.33186 | 2.05E-08 |
| RNF139-A FZD4    | -0.32984 | 2.53E-08 |
| RNF139-A TWIST2  | -0.31568 | 1.04E-07 |
| RNF144A- BIRC5   | 0.344077 | 5.63E-09 |
| RNF144A- CXCL12  | -0.34125 | 7.63E-09 |
| RNF144A- CDH2    | 0.303245 | 3.42E-07 |
| RNF217-A ZEB1    | 0.338876 | 9.83E-09 |
| RNU6ATA\FZD4     | 0.812268 | ≤0.0001  |
| RNU6ATA\FGF2     | 0.654602 | ≤0.0001  |
| RNU6ATA\TWIST2   | 0.721657 | ≤0.0001  |
| RNU6ATA\ZEB1     | 0.569338 | ≤0.0001  |
| RNU6ATA\TWIST1   | 0.475731 | ≤0.0001  |
| RNU6ATA\CXCL12   | 0.438333 | 3.38E-14 |
| RNU6ATA\BIRC5    | -0.34092 | 7.90E-09 |
| ROR1-AS1CDH2     | 0.313565 | 1.28E-07 |
| ROR1-AS1ZEB1     | 0.311535 | 1.56E-07 |
| RORA-AS\CDH2     | 0.319281 | 7.32E-08 |
| RORB-AS1TWIST1   | 0.372668 | 2.18E-10 |
| RORB-AS1ZEB1     | 0.301149 | 4.15E-07 |
| RPARP-ASZEB1     | -0.35555 | 1.59E-09 |
| RPARP-ASTWIST2   | -0.3177  | 8.56E-08 |
| RPARP-ASFZD4     | -0.31254 | 1.41E-07 |
| RTCA-AS1EGF      | 0.350201 | 2.88E-09 |
| RTCA-AS1BIRC5    | -0.34604 | 4.55E-09 |
| RTCA-AS1SNAI1    | -0.3336  | 1.71E-08 |
| RUVBL1-AZEB1     | 0.328312 | 2.95E-08 |
| SALRNA1 CDH2     | 0.366791 | 4.37E-10 |
| SALRNA1 ZEB1     | 0.312993 | 1.35E-07 |
| SBF2-AS1 TGFB1   | -0.30594 | 2.66E-07 |
| SCAMP1-EGF       | 0.416204 | 8.06E-13 |
| SCAMP1-BIRC5     | -0.32073 | 6.34E-08 |
| SCARNA9 ZEB1     | 0.306516 | 2.52E-07 |
| SCHLAP1 HIF1A    | 0.326398 | 3.59E-08 |
| SDCBP2-AZEB1     | 0.449062 | 6.66E-15 |
| SEC24B-A EGF     | 0.331009 | 2.24E-08 |
| SEC62-AS ZEB1    | 0.370477 | 2.83E-10 |
| SEMA3B- TWIST2   | 0.512705 | ≤0.0001  |
| SEMA3B- FZD4     | 0.47122  | 2.22E-16 |
| SEMA3B- ZEB1     | 0.364485 | 5.72E-10 |
| SEMA3B- FGF2     | 0.351756 | 2.43E-09 |
| SEMA3B- TWIST1   | 0.319577 | 7.11E-08 |
| SEMA3F- BIRC5    | -0.43364 | 6.75E-14 |
| SEMA3F- A CXCL12 | 0.423558 | 2.88E-13 |
| SEMA3F- AZEB1    | 0.401737 | 5.68E-12 |
| SEMA3F- A EGF    | 0.30706  | 2.39E-07 |
| SEMA6A- ZEB1     | 0.400496 | 6.69E-12 |
| SENCR TWIST2     | 0.475778 | ≤0.0001  |
| SENCR CXCL12     | 0.426487 | 1.90E-13 |
| SENCR ZEB1       | 0.376044 | 1.45E-10 |
| SENCR TWIST1     | 0.352602 | 2.21E-09 |
| SENCR FZD4       | 0.327765 | 3.12E-08 |
| SEPT7-AS BIRC5   | -0.54924 | ≤0.0001  |
| SEPT7-AS ZEB1    | 0.479607 | ≤0.0001  |
| SEPT7-AS CXCL12  | 0.458351 | 1.55E-15 |
| SEPT7-AS FGF2    | 0.380634 | 8.32E-11 |
| SEPT7-AS EGF     | 0.352343 | 2.27E-09 |
| SEPT7-AS FZD4    | 0.313523 | 1.29E-07 |
| SERTAD4- PDGFB   | 0.325951 | 3.76E-08 |

|           |        |          |          |
|-----------|--------|----------|----------|
| SFTA1P    | FZD4   | 0.400092 | 7.05E-12 |
| SFTA1P    | TGFB1  | 0.365614 | 5.01E-10 |
| SFTA1P    | TWIST2 | 0.326233 | 3.65E-08 |
| SFTA1P    | ZEB1   | 0.313926 | 1.24E-07 |
| SFTA1P    | TWIST1 | 0.306504 | 2.52E-07 |
| SGMS1-A   | CXCL12 | 0.641947 | ≤0.0001  |
| SGMS1-A   | BIRC5  | -0.65704 | ≤0.0001  |
| SGMS1-A   | EGF    | 0.518936 | ≤0.0001  |
| SGMS1-A   | FGF2   | 0.446867 | 9.33E-15 |
| SGMS1-A   | ZEB1   | 0.436087 | 4.71E-14 |
| SGMS1-A   | SNAI1  | -0.37158 | 2.48E-10 |
| SGMS1-A   | FZD4   | 0.341103 | 7.75E-09 |
| SGMS1-A   | CXCR4  | -0.3017  | 3.95E-07 |
| SH3BP5-A  | ZEB1   | 0.434628 | 5.84E-14 |
| SH3BP5-A  | BIRC5  | -0.4277  | 1.59E-13 |
| SH3BP5-A  | CXCL12 | 0.415978 | 8.32E-13 |
| SH3BP5-A  | EGF    | 0.312371 | 1.44E-07 |
| SH3RF3-A  | ZEB1   | 0.406999 | 2.82E-12 |
| SH3RF3-A  | TWIST2 | 0.360725 | 8.82E-10 |
| SH3RF3-A  | FZD4   | 0.327594 | 3.18E-08 |
| SHANK3    | CXCL12 | 0.603138 | ≤0.0001  |
| SHANK3    | FZD4   | 0.684477 | ≤0.0001  |
| SHANK3    | FGF2   | 0.594401 | ≤0.0001  |
| SHANK3    | TWIST2 | 0.612237 | ≤0.0001  |
| SHANK3    | ZEB1   | 0.654036 | ≤0.0001  |
| SHANK3    | BIRC5  | -0.46125 | 8.88E-16 |
| SHANK3    | TWIST1 | 0.436879 | 4.17E-14 |
| SLC14A2-  | FZD4   | 0.615608 | ≤0.0001  |
| SLC14A2-  | FGF2   | 0.54842  | ≤0.0001  |
| SLC14A2-  | TWIST2 | 0.58527  | ≤0.0001  |
| SLC14A2-  | ZEB1   | 0.611329 | ≤0.0001  |
| SLC14A2-  | CXCL12 | 0.472027 | 2.22E-16 |
| SLC14A2-  | BIRC5  | -0.34443 | 5.42E-09 |
| SLC16A1-  | CDH2   | 0.346329 | 4.41E-09 |
| SLC25A21  | CXCL12 | 0.513068 | ≤0.0001  |
| SLC25A21  | BIRC5  | -0.53048 | ≤0.0001  |
| SLC25A21  | EGF    | 0.481744 | ≤0.0001  |
| SLC25A21  | FGF2   | 0.408672 | 2.25E-12 |
| SLC25A21  | SNAI1  | -0.36033 | 9.23E-10 |
| SLC25A21  | TGFB1  | -0.34059 | 8.18E-09 |
| SLC25A25  | CDH2   | 0.301213 | 4.13E-07 |
| SLC25A30  | EGF    | 0.467285 | 4.44E-16 |
| SLC25A30  | BIRC5  | -0.44692 | 9.33E-15 |
| SLC25A30  | CXCL12 | 0.37299  | 2.10E-10 |
| SLC7A11-  | CDH2   | 0.357397 | 1.29E-09 |
| SLC8A1-A  | CDH2   | 0.344113 | 5.61E-09 |
| SLC9A9-A  | CDH2   | 0.305685 | 2.72E-07 |
| SLC9A9-A  | CDH2   | 0.332265 | 1.97E-08 |
| SLIT2-IT1 | CDH2   | 0.350691 | 2.73E-09 |
| SMAD1-A   | CDH2   | 0.322269 | 5.44E-08 |
| SMAD9-IT  | ZEB1   | 0.356123 | 1.49E-09 |
| SMAD9-IT  | CDH2   | 0.322098 | 5.54E-08 |
| SMCR5     | CDH2   | 0.317613 | 8.63E-08 |
| SMG7-AS   | FZD4   | -0.31331 | 1.31E-07 |
| SMG7-AS   | CXCL12 | -0.30934 | 1.92E-07 |
| SMG7-AS   | TWIST2 | -0.30074 | 4.31E-07 |
| SNAI3-AS  | TGFB1  | 0.357237 | 1.31E-09 |
| SNCA-AS1  | CXCL12 | 0.367489 | 4.03E-10 |



|        |        |          |          |
|--------|--------|----------|----------|
| SNHG1  | BIRC5  | 0.510644 | ≤0.0001  |
| SNHG1  | CXCL12 | -0.42293 | 3.15E-13 |
| SNHG1  | FZD4   | -0.40557 | 3.42E-12 |
| SNHG1  | ZEB1   | -0.39777 | 9.54E-12 |
| SNHG1  | CDH2   | 0.374523 | 1.75E-10 |
| SNHG1  | TWIST2 | -0.35698 | 1.35E-09 |
| SNHG1  | FGF2   | -0.35358 | 1.98E-09 |
| SNHG10 | ZEB1   | -0.38125 | 7.71E-11 |
| SNHG10 | BIRC5  | 0.375453 | 1.56E-10 |
| SNHG10 | FZD4   | -0.3537  | 1.95E-09 |
| SNHG10 | CXCL12 | -0.3455  | 4.83E-09 |
| SNHG11 | ZEB1   | -0.30834 | 2.12E-07 |
| SNHG12 | BIRC5  | 0.454348 | 2.89E-15 |
| SNHG12 | FZD4   | -0.41159 | 1.52E-12 |
| SNHG12 | ZEB1   | -0.41019 | 1.84E-12 |
| SNHG12 | CXCL12 | -0.40927 | 2.08E-12 |
| SNHG12 | FGF2   | -0.40133 | 5.99E-12 |
| SNHG12 | TWIST2 | -0.35118 | 2.59E-09 |
| SNHG14 | BIRC5  | -0.43271 | 7.73E-14 |
| SNHG14 | EGF    | 0.424006 | 2.70E-13 |
| SNHG14 | ZEB1   | 0.414683 | 9.94E-13 |
| SNHG14 | CXCL12 | 0.366458 | 4.54E-10 |
| SNHG15 | BIRC5  | 0.436642 | 4.35E-14 |
| SNHG15 | ZEB1   | -0.40819 | 2.41E-12 |
| SNHG15 | FZD4   | -0.35826 | 1.17E-09 |
| SNHG15 | FGF2   | -0.34448 | 5.39E-09 |
| SNHG15 | CXCL12 | -0.33727 | 1.17E-08 |
| SNHG16 | BIRC5  | 0.467651 | 4.44E-16 |
| SNHG16 | CDH2   | 0.324572 | 4.32E-08 |
| SNHG16 | CXCL12 | -0.31849 | 7.92E-08 |
| SNHG17 | CXCL12 | -0.43319 | 7.19E-14 |
| SNHG17 | ZEB1   | -0.42388 | 2.75E-13 |
| SNHG17 | BIRC5  | 0.420044 | 4.73E-13 |
| SNHG17 | FGF2   | -0.41494 | 9.60E-13 |
| SNHG17 | FZD4   | -0.40779 | 2.54E-12 |
| SNHG17 | CDH2   | 0.316675 | 9.47E-08 |
| SNHG17 | TWIST2 | -0.30024 | 4.52E-07 |
| SNHG20 | BIRC5  | 0.44304  | 1.67E-14 |
| SNHG20 | FZD4   | -0.37668 | 1.35E-10 |
| SNHG20 | CDH2   | 0.344787 | 5.21E-09 |
| SNHG20 | ZEB1   | -0.33809 | 1.07E-08 |
| SNHG20 | FGF2   | -0.33033 | 2.40E-08 |
| SNHG20 | TWIST2 | -0.31153 | 1.56E-07 |
| SNHG21 | BIRC5  | 0.392338 | 1.92E-11 |
| SNHG21 | ZEB1   | -0.3438  | 5.80E-09 |
| SNHG21 | FZD4   | -0.32346 | 4.83E-08 |
| SNHG21 | CXCL12 | -0.31762 | 8.63E-08 |
| SNHG3  | BIRC5  | 0.434888 | 5.62E-14 |
| SNHG3  | CXCL12 | -0.37696 | 1.30E-10 |
| SNHG3  | FGF2   | -0.33833 | 1.04E-08 |
| SNHG3  | FZD4   | -0.33118 | 2.20E-08 |
| SNHG4  | EGF    | 0.322704 | 5.21E-08 |
| SNHG6  | BIRC5  | 0.444039 | 1.42E-14 |
| SNHG6  | ZEB1   | -0.38912 | 2.89E-11 |
| SNHG6  | CXCL12 | -0.35035 | 2.83E-09 |
| SNHG7  | HIF1A  | -0.31329 | 1.32E-07 |
| SNHG8  | HIF1A  | -0.34269 | 6.53E-09 |
| SNHG8  | EGF    | 0.327904 | 3.08E-08 |

|           |        |          |          |
|-----------|--------|----------|----------|
| SNHG9     | ZEB1   | -0.34599 | 4.57E-09 |
| SOCS2-AS  | BIRC5  | -0.36357 | 6.36E-10 |
| SORCS3-A  | CDH2   | 0.352935 | 2.13E-09 |
| SOX9-AS1  | TWIST2 | -0.30174 | 3.93E-07 |
| SOX9-AS1  | FZD4   | -0.30099 | 4.21E-07 |
| SP2-AS1   | ZEB1   | 0.318478 | 7.93E-08 |
| SPATA13   | EGF    | 0.447113 | 8.88E-15 |
| SPATA41   | CXCL12 | 0.333532 | 1.72E-08 |
| SPATA41   | TWIST2 | 0.30734  | 2.33E-07 |
| SPIN4-AS  | BIRC5  | -0.32058 | 6.44E-08 |
| SPIN4-AS  | EGF    | 0.300272 | 4.50E-07 |
| SRGAP2-A  | CDH2   | 0.335861 | 1.35E-08 |
| SRGAP3-A  | CDH2   | 0.310372 | 1.74E-07 |
| SRP14-AS  | CXCL12 | 0.565717 | ≤0.0001  |
| SRP14-AS  | BIRC5  | -0.48563 | ≤0.0001  |
| SRP14-AS  | FZD4   | 0.538564 | ≤0.0001  |
| SRP14-AS  | FGF2   | 0.541042 | ≤0.0001  |
| SRP14-AS  | ZEB1   | 0.514814 | ≤0.0001  |
| SRP14-AS  | TWIST2 | 0.435987 | 4.77E-14 |
| SRP14-AS  | HIF1A  | -0.36713 | 4.20E-10 |
| SRP14-AS  | CXCR4  | -0.33128 | 2.18E-08 |
| SSBP3-AS  | ZEB1   | 0.357031 | 1.34E-09 |
| SSSCA1-A  | TWIST2 | -0.31587 | 1.02E-07 |
| SSSCA1-A  | FZD4   | -0.31017 | 1.78E-07 |
| ST3GAL5-  | ZEB1   | 0.344369 | 5.45E-09 |
| ST7-AS2   | CDH2   | 0.355418 | 1.61E-09 |
| ST7-OT4   | CDH2   | 0.35623  | 1.47E-09 |
| ST8SIA6-A | CXCL12 | -0.37845 | 1.09E-10 |
| ST8SIA6-A | FGF2   | -0.36436 | 5.80E-10 |
| ST8SIA6-A | HIF1A  | 0.335606 | 1.39E-08 |
| ST8SIA6-A | TWIST2 | -0.3321  | 2.00E-08 |
| STAM-AS   | BIRC5  | 0.37612  | 1.44E-10 |
| STAM-AS   | CXCL12 | -0.35341 | 2.02E-09 |
| STAM-AS   | TWIST2 | -0.32564 | 3.88E-08 |
| STAM-AS   | FZD4   | -0.3237  | 4.71E-08 |
| STARD4-A  | CDH2   | 0.373487 | 1.98E-10 |
| STARD7-A  | CDH2   | 0.345972 | 4.58E-09 |
| STAU2-AS  | BIRC5  | 0.309973 | 1.81E-07 |
| STX17-AS  | EGF    | 0.421422 | 3.89E-13 |
| STXBP5-A  | CXCL12 | 0.538374 | ≤0.0001  |
| STXBP5-A  | BIRC5  | -0.51639 | ≤0.0001  |
| STXBP5-A  | ZEB1   | 0.521544 | ≤0.0001  |
| STXBP5-A  | FGF2   | 0.404378 | 4.01E-12 |
| STXBP5-A  | FZD4   | 0.356695 | 1.40E-09 |
| SUCLG2-A  | ZEB1   | 0.47094  | 2.22E-16 |
| SUCLG2-A  | BIRC5  | -0.42788 | 1.55E-13 |
| SUCLG2-A  | EGF    | 0.420158 | 4.65E-13 |
| SUCLG2-A  | FGF2   | 0.397209 | 1.03E-11 |
| SUCLG2-A  | CXCL12 | 0.373825 | 1.90E-10 |
| SUCLG2-A  | TGFB1  | -0.34032 | 8.43E-09 |
| SUCLG2-A  | FZD4   | 0.324687 | 4.27E-08 |
| SYNE1-AS  | FZD4   | 0.484909 | ≤0.0001  |
| SYNE1-AS  | FGF2   | 0.531021 | ≤0.0001  |
| SYNE1-AS  | ZEB1   | 0.494165 | ≤0.0001  |
| SYNE1-AS  | CXCL12 | 0.459345 | 1.33E-15 |
| SYNE1-AS  | TWIST2 | 0.419139 | 5.36E-13 |
| SYNE1-AS  | BIRC5  | -0.38084 | 8.11E-11 |
| TAPT1-AS  | BIRC5  | -0.46325 | 6.66E-16 |

|                 |          |          |
|-----------------|----------|----------|
| TAPT1-AS ZEB1   | 0.464162 | 6.66E-16 |
| TAPT1-AS CXCL12 | 0.362229 | 7.42E-10 |
| TAPT1-AS EGF    | 0.342897 | 6.39E-09 |
| TAT-AS1 EGF     | 0.336979 | 1.20E-08 |
| TAT-AS1 BIRC5   | -0.30166 | 3.96E-07 |
| TBL1XR1-CDH2    | 0.321703 | 5.76E-08 |
| TBX2-AS1 TWIST1 | 0.468384 | 4.44E-16 |
| TBX2-AS1 TGFB1  | 0.463467 | 6.66E-16 |
| TBX2-AS1 ZEB1   | 0.337134 | 1.18E-08 |
| TBX5-AS1 CXCL12 | 0.710026 | ≤0.0001  |
| TBX5-AS1 BIRC5  | -0.51887 | ≤0.0001  |
| TBX5-AS1 FZD4   | 0.473701 | ≤0.0001  |
| TBX5-AS1 FGF2   | 0.485345 | ≤0.0001  |
| TBX5-AS1 TWIST2 | 0.487398 | ≤0.0001  |
| TBX5-AS1 ZEB1   | 0.61663  | ≤0.0001  |
| TESC-AS1 EGF    | 0.454026 | 3.11E-15 |
| TESC-AS1 BIRC5  | -0.307   | 2.40E-07 |
| TEX26-AS ZEB1   | 0.402021 | 5.47E-12 |
| TFAP2A-A FGF2   | -0.32701 | 3.37E-08 |
| TFAP2A-A FZD4   | -0.32352 | 4.80E-08 |
| TFAP2A-A CXCL12 | -0.32113 | 6.10E-08 |
| TFAP2A-A TWIST2 | -0.316   | 1.01E-07 |
| TGFB2-AS CDH2   | 0.394946 | 1.38E-11 |
| THRB-AS1 CXCL12 | 0.548936 | ≤0.0001  |
| THRB-AS1 BIRC5  | -0.56249 | ≤0.0001  |
| THRB-AS1 FZD4   | 0.486564 | ≤0.0001  |
| THRB-AS1 FGF2   | 0.467722 | 4.44E-16 |
| THRB-AS1 ZEB1   | 0.454119 | 3.11E-15 |
| THRB-AS1 TWIST2 | 0.423094 | 3.08E-13 |
| THRB-AS1 EGF    | 0.418687 | 5.71E-13 |
| THRB-AS1 CXCR4  | -0.35887 | 1.09E-09 |
| THRB-AS1 TWIST1 | 0.317499 | 8.73E-08 |
| THUMPD3 TWIST2  | -0.32053 | 6.47E-08 |
| THUMPD3 FZD4    | -0.31475 | 1.14E-07 |
| TINCR CXCL12    | -0.3319  | 2.04E-08 |
| TINCR FGF2      | -0.3152  | 1.09E-07 |
| TINCR ZEB1      | -0.30145 | 4.04E-07 |
| TIPARP-A ZEB1   | -0.44071 | 2.35E-14 |
| TIPARP-A FZD4   | -0.34841 | 3.51E-09 |
| TMEM108 CDH2    | 0.311849 | 1.51E-07 |
| TMEM147 FZD4    | -0.32005 | 6.79E-08 |
| TMEM161 EGF     | 0.328848 | 2.80E-08 |
| TMEM191 FZD4    | -0.47257 | ≤0.0001  |
| TMEM191 ZEB1    | -0.55833 | ≤0.0001  |
| TMEM191 CXCL12  | -0.45661 | 2.00E-15 |
| TMEM191 FGF2    | -0.44524 | 1.20E-14 |
| TMEM191 TWIST2  | -0.37949 | 9.56E-11 |
| TMEM191 BIRC5   | 0.334881 | 1.50E-08 |
| TMEM191 ZEB1    | -0.40579 | 3.32E-12 |
| TMEM191 FZD4    | -0.36079 | 8.76E-10 |
| TMEM191 FGF2    | -0.31994 | 6.86E-08 |
| TMEM191 TWIST2  | -0.30967 | 1.86E-07 |
| TMEM191 CXCL12  | -0.30654 | 2.51E-07 |
| TMEM220 CXCL12  | 0.676192 | ≤0.0001  |
| TMEM220 BIRC5   | -0.6185  | ≤0.0001  |
| TMEM220 FZD4    | 0.499503 | ≤0.0001  |
| TMEM220 FGF2    | 0.561282 | ≤0.0001  |
| TMEM220 ZEB1    | 0.502031 | ≤0.0001  |

|                 |          |          |
|-----------------|----------|----------|
| TMEM220 EGF     | 0.458743 | 1.33E-15 |
| TMEM220 TWIST2  | 0.434087 | 6.31E-14 |
| TMEM220 SNAI1   | -0.33002 | 2.48E-08 |
| TMEM220 CXCR4   | -0.31989 | 6.90E-08 |
| TMEM246 FZD4    | 0.581696 | ≤0.0001  |
| TMEM246 FGF2    | 0.51934  | ≤0.0001  |
| TMEM246 TWIST2  | 0.472533 | ≤0.0001  |
| TMEM246 ZEB1    | 0.587338 | ≤0.0001  |
| TMEM246 CXCL12  | 0.380557 | 8.39E-11 |
| TMEM246 TWIST1  | 0.307738 | 2.24E-07 |
| TMEM246 BIRC5   | -0.30351 | 3.33E-07 |
| TMEM26-,EGF     | 0.418868 | 5.57E-13 |
| TMEM26-,BIRC5   | -0.38507 | 4.80E-11 |
| TMEM75 CDH2     | 0.344532 | 5.36E-09 |
| TMEM9B-,EGF     | 0.59816  | ≤0.0001  |
| TMEM9B-,BIRC5   | -0.46873 | 4.44E-16 |
| TMEM9B-,CXCL12  | 0.413725 | 1.13E-12 |
| TMEM9B-,SNAI1   | -0.31631 | 9.82E-08 |
| TMPO-AS CXCL12  | -0.52651 | ≤0.0001  |
| TMPO-AS BIRC5   | 0.627753 | ≤0.0001  |
| TMPO-AS ZEB1    | -0.44447 | 1.33E-14 |
| TMPO-AS FGF2    | -0.44012 | 2.58E-14 |
| TMPO-AS FZD4    | -0.41379 | 1.12E-12 |
| TMPO-AS TWIST2  | -0.4068  | 2.90E-12 |
| TMPO-AS CDH2    | 0.402018 | 5.47E-12 |
| TP73-AS1 CXCL12 | 0.438763 | 3.15E-14 |
| TP73-AS1 EGF    | 0.435321 | 5.28E-14 |
| TP73-AS1 BIRC5  | -0.42062 | 4.36E-13 |
| TP73-AS1 SNAI1  | -0.32721 | 3.30E-08 |
| TPRG1-AS CXCL12 | 0.537419 | ≤0.0001  |
| TPRG1-AS BIRC5  | -0.4884  | ≤0.0001  |
| TPRG1-AS FZD4   | 0.753331 | ≤0.0001  |
| TPRG1-AS FGF2   | 0.617393 | ≤0.0001  |
| TPRG1-AS TWIST2 | 0.569154 | ≤0.0001  |
| TPRG1-AS ZEB1   | 0.58505  | ≤0.0001  |
| TPRG1-AS TWIST1 | 0.356049 | 1.50E-09 |
| TPRG1-AS CXCR4  | -0.34872 | 3.39E-09 |
| TPT1-AS1 EGF    | 0.485889 | ≤0.0001  |
| TPT1-AS1 BIRC5  | -0.39061 | 2.39E-11 |
| TPT1-AS1 CXCL12 | 0.311464 | 1.57E-07 |
| TPTEP1 EGF      | 0.446873 | 9.33E-15 |
| TPTEP1 BIRC5    | -0.31303 | 1.35E-07 |
| TPTEP1 SNAI1    | -0.31209 | 1.48E-07 |
| TRAF3IP2-CDH2   | 0.316354 | 9.77E-08 |
| TRAF3IP2-ZEB1   | 0.316283 | 9.84E-08 |
| TRAM2-A'FGF2    | 0.453047 | 3.55E-15 |
| TRAM2-A'CXCL12  | 0.441981 | 1.95E-14 |
| TRAM2-A'ZEB1    | 0.415196 | 9.27E-13 |
| TRAM2-A'FZD4    | 0.413822 | 1.12E-12 |
| TRAM2-A'BIRC5   | -0.38056 | 8.39E-11 |
| TRAM2-A'SNAI1   | -0.35647 | 1.43E-09 |
| TRG-AS1 CXCR4   | 0.35257  | 2.22E-09 |
| TRG-AS1 TGFB1   | 0.310178 | 1.78E-07 |
| TRHDE-AS CXCL12 | 0.494148 | ≤0.0001  |
| TRHDE-AS FZD4   | 0.888263 | ≤0.0001  |
| TRHDE-AS FGF2   | 0.771976 | ≤0.0001  |
| TRHDE-AS TWIST2 | 0.788942 | ≤0.0001  |
| TRHDE-AS ZEB1   | 0.698605 | ≤0.0001  |

|                  |          |          |
|------------------|----------|----------|
| TRHDE-AS TWIST1  | 0.615565 | ≤0.0001  |
| TRHDE-AS BIRC5   | -0.38517 | 4.75E-11 |
| TRIM52-A CXCL12  | 0.489659 | ≤0.0001  |
| TRIM52-A FZD4    | 0.523466 | ≤0.0001  |
| TRIM52-A TWIST2  | 0.571095 | ≤0.0001  |
| TRIM52-A TWIST1  | 0.495226 | ≤0.0001  |
| TRIM52-A FGF2    | 0.448796 | 6.88E-15 |
| TRIM52-A ZEB1    | 0.408539 | 2.30E-12 |
| TRIM52-A HIF1A   | -0.38811 | 3.28E-11 |
| TRIM52-A BIRC5   | -0.37174 | 2.44E-10 |
| TRIM52-A CXCR4   | -0.31124 | 1.60E-07 |
| TRPM2-AS FGF2    | -0.41026 | 1.82E-12 |
| TRPM2-AS ZEB1    | -0.39986 | 7.27E-12 |
| TRPM2-AS CXCL12  | -0.37426 | 1.80E-10 |
| TRPM2-AS FZD4    | -0.35112 | 2.60E-09 |
| TRPM2-AS TWIST2  | -0.31554 | 1.06E-07 |
| TSPEAR-A CDH2    | 0.318386 | 8.00E-08 |
| TSPEAR-A CDH2    | 0.323708 | 4.71E-08 |
| TSTD3 CXCL12     | 0.566374 | ≤0.0001  |
| TSTD3 FZD4       | 0.640603 | ≤0.0001  |
| TSTD3 FGF2       | 0.580679 | ≤0.0001  |
| TSTD3 TWIST2     | 0.566537 | ≤0.0001  |
| TSTD3 ZEB1       | 0.508058 | ≤0.0001  |
| TSTD3 BIRC5      | -0.41433 | 1.04E-12 |
| TSTD3 TWIST1     | 0.380819 | 8.13E-11 |
| TSTD3 CXCR4      | -0.31775 | 8.52E-08 |
| TSTD3 HIF1A      | -0.30119 | 4.14E-07 |
| TTC28-AS EGF     | 0.368836 | 3.44E-10 |
| TTC39A-A BIRC5   | -0.34036 | 8.39E-09 |
| TTC3-AS1 CDH2    | 0.30366  | 3.29E-07 |
| TTLL10-AS FZD4   | 0.553222 | ≤0.0001  |
| TTLL10-AS TWIST2 | 0.53499  | ≤0.0001  |
| TTLL10-AS ZEB1   | 0.576822 | ≤0.0001  |
| TTLL10-AS CXCL12 | 0.448272 | 7.55E-15 |
| TTLL10-AS FGF2   | 0.424369 | 2.57E-13 |
| TTLL10-AS BIRC5  | -0.38798 | 3.34E-11 |
| TTLL10-AS TWIST1 | 0.354173 | 1.85E-09 |
| TTLL11-IT: HIF1A | 0.390678 | 2.37E-11 |
| TTLL7-IT1 CDH2   | 0.315298 | 1.08E-07 |
| TTN-AS1 EGF      | 0.444845 | 1.27E-14 |
| TTN-AS1 BIRC5    | -0.36233 | 7.34E-10 |
| TTN-AS1 CXCL12   | 0.307236 | 2.35E-07 |
| TUB-AS1 CDH2     | 0.330861 | 2.27E-08 |
| TUG1 TWIST2      | -0.36712 | 4.20E-10 |
| TUSC7 CDH2       | 0.354523 | 1.78E-09 |
| TUSC8 EGF        | 0.536588 | ≤0.0001  |
| TUSC8 BIRC5      | -0.40449 | 3.94E-12 |
| TYMSOS BIRC5     | 0.660395 | ≤0.0001  |
| TYMSOS CXCL12    | -0.4423  | 1.87E-14 |
| TYMSOS ZEB1      | -0.42059 | 4.38E-13 |
| TYMSOS FGF2      | -0.36426 | 5.87E-10 |
| TYMSOS FZD4      | -0.34671 | 4.23E-09 |
| TYMSOS TWIST2    | -0.31463 | 1.16E-07 |
| U91324.1 FZD4    | 0.600977 | ≤0.0001  |
| U91324.1 TWIST2  | 0.498595 | ≤0.0001  |
| U91324.1 ZEB1    | 0.539169 | ≤0.0001  |
| U91324.1 FGF2    | 0.428236 | 1.48E-13 |
| U91324.1 CXCL12  | 0.385202 | 4.73E-11 |

|                 |          |          |
|-----------------|----------|----------|
| UBA6-AS1TWIST2  | -0.32968 | 2.57E-08 |
| UBE2E2-A FGF2   | 0.49388  | ≤0.0001  |
| UBE2E2-A FZD4   | 0.398066 | 9.19E-12 |
| UBE2E2-A TWIST2 | 0.310623 | 1.70E-07 |
| UBL7-AS1 EGF    | 0.340016 | 8.70E-09 |
| UBXN7-AS1CDH2   | 0.30303  | 3.49E-07 |
| UCKL1-AS1CDH2   | 0.327534 | 3.20E-08 |
| UGDH-AS1BIRC5   | -0.49182 | ≤0.0001  |
| UGDH-AS1EGF     | 0.575865 | ≤0.0001  |
| UGDH-AS1CXCL12  | 0.42266  | 3.27E-13 |
| UMAD1 BIRC5     | -0.47768 | ≤0.0001  |
| UMAD1 CXCL12    | 0.411447 | 1.55E-12 |
| UMAD1 EGF       | 0.376549 | 1.37E-10 |
| UNC5B-AS1BIRC5  | 0.363034 | 6.76E-10 |
| UNQ6494 CXCL12  | -0.3149  | 1.13E-07 |
| UNQ6494 FGF2    | -0.30796 | 2.19E-07 |
| URB1-AS1ZEB1    | -0.42247 | 3.36E-13 |
| URB1-AS1CXCL12  | -0.34452 | 5.36E-09 |
| USP27X-A EGF    | 0.365199 | 5.26E-10 |
| USP2-AS1CXCL12  | -0.4781  | ≤0.0001  |
| USP2-AS1BIRC5   | 0.524024 | ≤0.0001  |
| USP2-AS1ZEB1    | -0.40608 | 3.19E-12 |
| USP2-AS1FZD4    | -0.38866 | 3.07E-11 |
| USP2-AS1FGF2    | -0.35369 | 1.96E-09 |
| USP2-AS1TWIST2  | -0.3289  | 2.78E-08 |
| USP30-AS1TGFB1  | 0.33533  | 1.43E-08 |
| USP30-AS1CXCL12 | -0.31201 | 1.49E-07 |
| USP46-AS1FGF2   | 0.482677 | ≤0.0001  |
| USP46-AS1CXCL12 | 0.433881 | 6.51E-14 |
| USP46-AS1ZEB1   | 0.432269 | 8.24E-14 |
| USP46-AS1BIRC5  | -0.4221  | 3.54E-13 |
| USP46-AS1FZD4   | 0.405381 | 3.50E-12 |
| VENTXP1 CDH2    | 0.345835 | 4.65E-09 |
| VIM-AS1 ZEB1    | -0.34552 | 4.81E-09 |
| VIM-AS1 FZD4    | -0.33637 | 1.28E-08 |
| VIM-AS1 CXCL12  | -0.325   | 4.13E-08 |
| VIM-AS1 TWIST2  | -0.32041 | 6.55E-08 |
| VIPR1-AS1BIRC5  | -0.49716 | ≤0.0001  |
| VIPR1-AS1EGF    | 0.570374 | ≤0.0001  |
| VIPR1-AS1CXCL12 | 0.365075 | 5.34E-10 |
| VIPR1-AS1SNAI1  | -0.34183 | 7.17E-09 |
| VLDLR-AS1FZD4   | 0.358401 | 1.15E-09 |
| VPS9D1-ABIRC5   | 0.506902 | ≤0.0001  |
| VPS9D1-ACXCL12  | -0.40812 | 2.43E-12 |
| VPS9D1-AZEB1    | -0.39643 | 1.14E-11 |
| VPS9D1-AFZD4    | -0.37442 | 1.77E-10 |
| VPS9D1-AFGF2    | -0.31395 | 1.23E-07 |
| WARS2-IT ZEB1   | 0.586354 | ≤0.0001  |
| WARS2-IT CXCL12 | 0.440836 | 2.31E-14 |
| WARS2-IT BIRC5  | -0.3952  | 1.33E-11 |
| WARS2-IT TWIST1 | 0.334069 | 1.63E-08 |
| WARS2-IT TWIST2 | 0.320441 | 6.53E-08 |
| WARS2-IT FZD4   | 0.320129 | 6.73E-08 |
| WASF3-AS1CDH2   | 0.34038  | 8.37E-09 |
| WASIR1 CDH2     | 0.47443  | ≤0.0001  |
| WASIR2 ZEB1     | -0.30848 | 2.09E-07 |
| WASIR2 TWIST2   | -0.30356 | 3.32E-07 |
| WDFY3-AS1CXCL12 | 0.801176 | ≤0.0001  |

|                 |          |          |
|-----------------|----------|----------|
| WDFY3-A:BIRC5   | -0.66978 | ≤0.0001  |
| WDFY3-A:FZD4    | 0.640315 | ≤0.0001  |
| WDFY3-A:FGF2    | 0.729959 | ≤0.0001  |
| WDFY3-A:TWIST2  | 0.523509 | ≤0.0001  |
| WDFY3-A:ZEB1    | 0.691519 | ≤0.0001  |
| WDFY3-A:TWIST1  | 0.407473 | 2.65E-12 |
| WDFY3-A:CXCR4   | -0.3969  | 1.07E-11 |
| WDFY3-A:EGF     | 0.338586 | 1.01E-08 |
| WDFY3-A:SNAI1   | -0.30819 | 2.15E-07 |
| WDR86-A:CXCL12  | 0.40703  | 2.81E-12 |
| WDR86-A:BIRC5   | -0.38575 | 4.41E-11 |
| WDR86-A:FGF2    | 0.30804  | 2.18E-07 |
| WEE2-AS1EGF     | 0.379369 | 9.71E-11 |
| WEE2-AS1BIRC5   | -0.3148  | 1.14E-07 |
| WFDC21P CXCL12  | -0.30294 | 3.52E-07 |
| WWC2-AS CXCL12  | 0.564354 | ≤0.0001  |
| WWC2-AS BIRC5   | -0.58095 | ≤0.0001  |
| WWC2-AS FZD4    | 0.567176 | ≤0.0001  |
| WWC2-AS FGF2    | 0.6381   | ≤0.0001  |
| WWC2-AS TWIST2  | 0.539309 | ≤0.0001  |
| WWC2-AS ZEB1    | 0.470288 | 2.22E-16 |
| WWC2-AS CXCR4   | -0.35616 | 1.48E-09 |
| WWC2-AS TWIST1  | 0.319994 | 6.83E-08 |
| WWTR1-A FZD4    | -0.36343 | 6.46E-10 |
| WWTR1-A ZEB1    | -0.32266 | 5.24E-08 |
| WWTR1-IT CDH2   | 0.306158 | 2.60E-07 |
| XIST ZEB1       | 0.362882 | 6.88E-10 |
| XXYLT1-A CDH2   | 0.308109 | 2.16E-07 |
| YEATS2-A CDH2   | 0.300379 | 4.46E-07 |
| YTHDF3-ATGFB1   | 0.359965 | 9.62E-10 |
| Z69720.2 FGF2   | -0.33896 | 9.74E-09 |
| ZBED3-AS FZD4   | 0.523747 | ≤0.0001  |
| ZBED3-AS TWIST2 | 0.511153 | ≤0.0001  |
| ZBED3-AS ZEB1   | 0.528408 | ≤0.0001  |
| ZBED3-AS TWIST1 | 0.517485 | ≤0.0001  |
| ZBED3-AS FGF2   | 0.410066 | 1.87E-12 |
| ZBED3-AS BIRC5  | -0.36453 | 5.69E-10 |
| ZBED3-AS CXCL12 | 0.311436 | 1.57E-07 |
| ZBTB11-A BIRC5  | 0.326392 | 3.59E-08 |
| ZBTB20-A CDH2   | 0.302408 | 3.70E-07 |
| ZBTB20-A ZEB1   | 0.386233 | 4.16E-11 |
| ZBTB40-IT ZEB1  | 0.355944 | 1.52E-09 |
| ZEB2-AS1 FZD4   | 0.565569 | ≤0.0001  |
| ZEB2-AS1 TWIST2 | 0.500616 | ≤0.0001  |
| ZEB2-AS1 ZEB1   | 0.654586 | ≤0.0001  |
| ZEB2-AS1 CXCL12 | 0.437198 | 4.00E-14 |
| ZEB2-AS1 TWIST1 | 0.436044 | 4.75E-14 |
| ZEB2-AS1 FGF2   | 0.412513 | 1.34E-12 |
| ZEB2-AS1 BIRC5  | -0.37607 | 1.45E-10 |
| ZFAS1 ZEB1      | -0.3373  | 1.16E-08 |
| ZFHx4-AS ZEB1   | 0.36194  | 7.67E-10 |
| ZFHx4-AS TWIST1 | 0.354327 | 1.82E-09 |
| ZFHx4-AS TWIST2 | 0.315669 | 1.04E-07 |
| ZFPM2-AS CDH2   | 0.327066 | 3.35E-08 |
| ZMIZ1-AS EGF    | 0.349646 | 3.06E-09 |
| ZNF30-AS EGF    | 0.401019 | 6.24E-12 |
| ZNF30-AS BIRC5  | -0.39178 | 2.06E-11 |
| ZNF30-AS SNAI1  | -0.33271 | 1.88E-08 |

|                 |          |          |
|-----------------|----------|----------|
| ZNF341-A CXCL12 | 0.306104 | 2.61E-07 |
| ZNF436-A CXCL12 | 0.513862 | ≤0.0001  |
| ZNF436-A FZD4   | 0.629488 | ≤0.0001  |
| ZNF436-A FGF2   | 0.526042 | ≤0.0001  |
| ZNF436-A TWIST2 | 0.510398 | ≤0.0001  |
| ZNF436-A ZEB1   | 0.645203 | ≤0.0001  |
| ZNF436-A BIRC5  | -0.45365 | 3.11E-15 |
| ZNF436-A TWIST1 | 0.352869 | 2.14E-09 |
| ZNF582-A CXCL12 | 0.554551 | ≤0.0001  |
| ZNF582-A BIRC5  | -0.5556  | ≤0.0001  |
| ZNF582-A EGF    | 0.379327 | 9.76E-11 |
| ZNF582-A FGF2   | 0.36824  | 3.69E-10 |
| ZNF582-A ZEB1   | 0.306335 | 2.56E-07 |
| ZNF883 ZEB1     | -0.36453 | 5.69E-10 |
| ZNF883 CXCL12   | -0.35472 | 1.74E-09 |
| ZNF883 FZD4     | -0.34196 | 7.07E-09 |
| ZNF883 BIRC5    | 0.334864 | 1.50E-08 |
| ZNF883 TWIST2   | -0.33235 | 1.95E-08 |
| ZRANB2-#ZEB1    | 0.454729 | 2.66E-15 |
| ZRANB2-#BIRC5   | -0.35896 | 1.08E-09 |
| ZRANB2-#CXCL12  | 0.323204 | 4.95E-08 |
| ZRANB2-#ZEB1    | 0.387681 | 3.47E-11 |
| ZSCAN16-TWIST2  | 0.533997 | ≤0.0001  |
| ZSCAN16-TWIST1  | 0.576353 | ≤0.0001  |
| ZSCAN16-FZD4    | 0.449559 | 6.22E-15 |
| ZSCAN16-ZEB1    | 0.328978 | 2.76E-08 |
| ZSCAN16-CXCL12  | 0.315045 | 1.11E-07 |
| ZSCAN16-FGF2    | 0.306176 | 2.60E-07 |
