# Supplementary figures and images for: Development of a Prognostic Model Based on the Identification of EMT-Related lncRNAs in Triple-Negative Breast Cancer
Source: Hindawi journal article supplement (doi:10.1155/2021/9219961), 2021-11-27

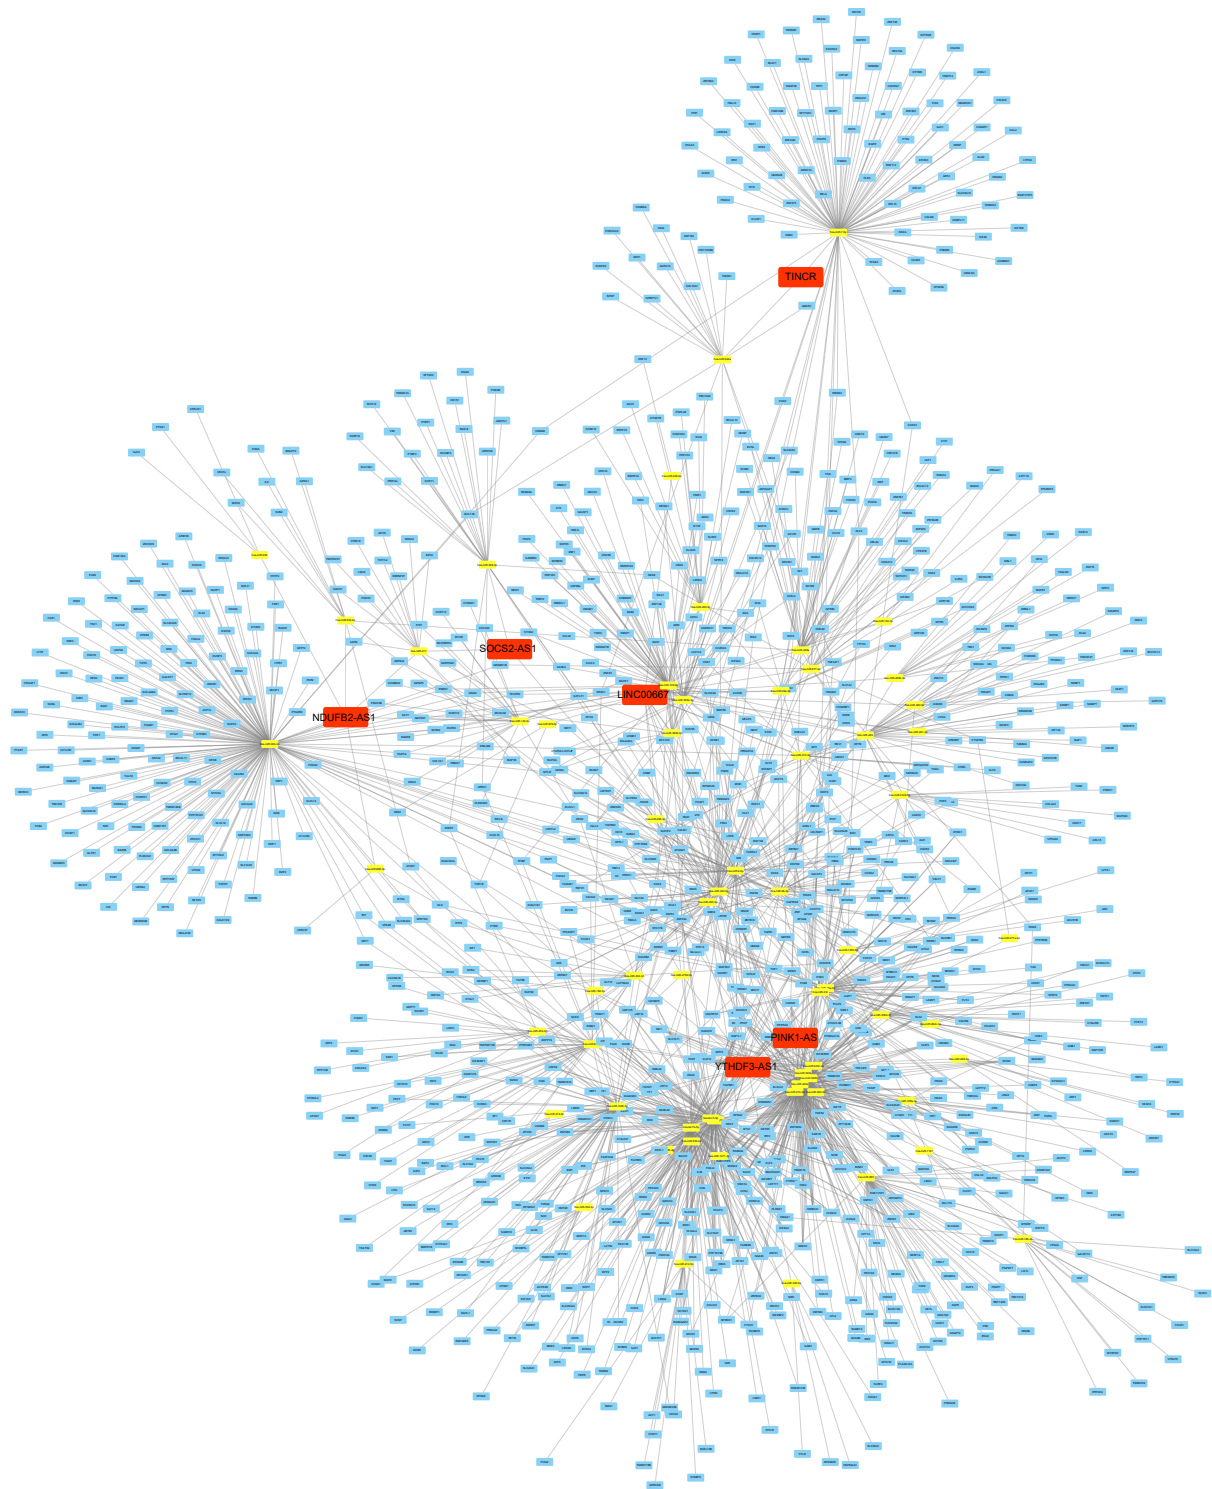

Supplement: f1 [file 9219961.f1.zip]

A

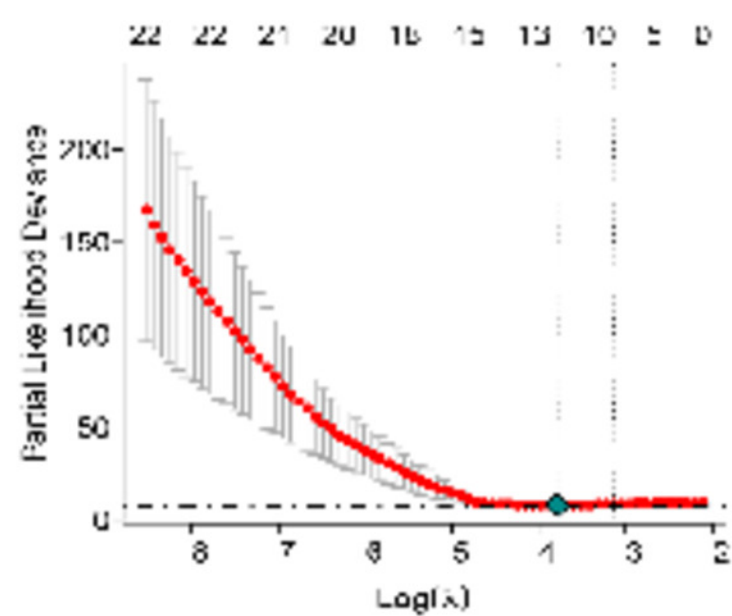

B

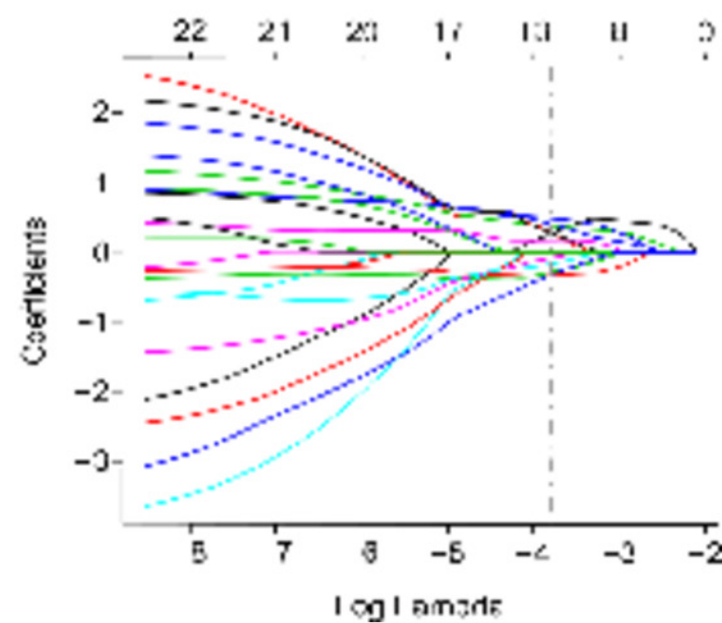

A

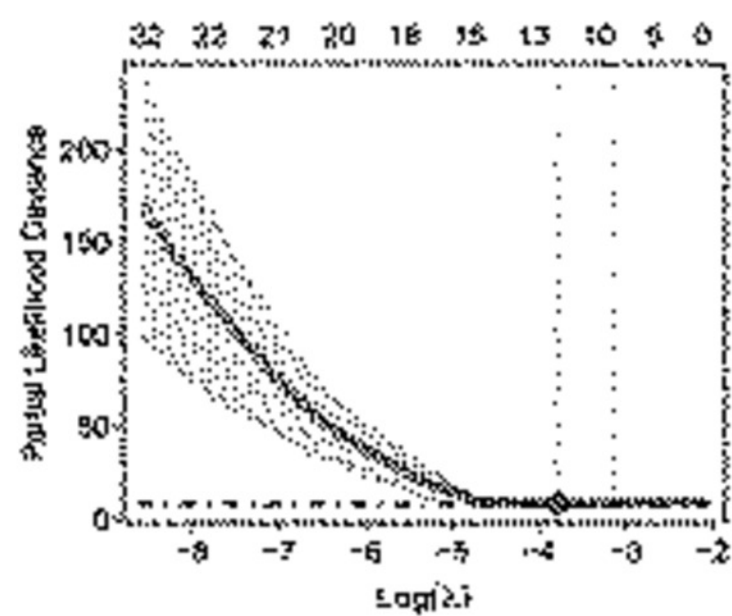

B

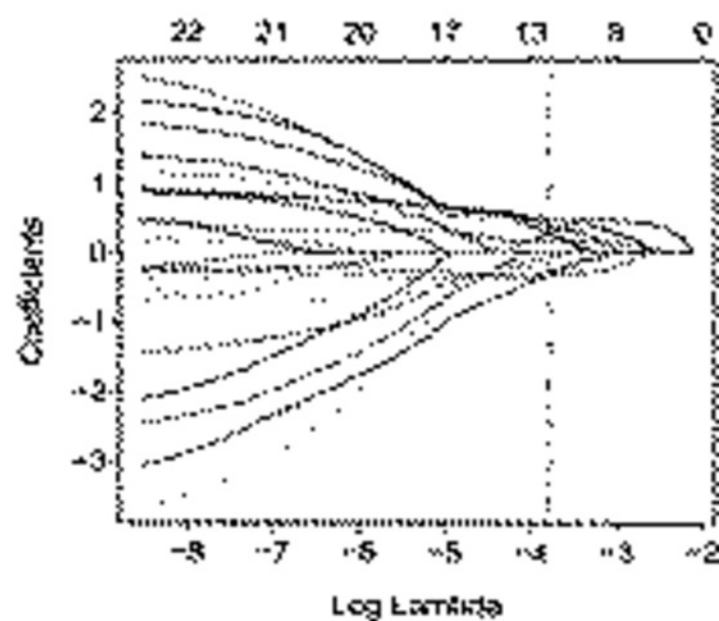

Supplement: f1 [file 9219961.f1.zip]
